# Supplementary material for: EnContact: predicting enhancer-enhancer contacts using sequence-based deep learning model
Source: PeerJ. 2019 Sep 13;7:e7657. doi: 10.7717/peerj.7657 (PMC6746221; doi:10.7717/peerj.7657)
Supplement: Supplemental Information 1 [file peerj-07-7657-s001.xlsx]

## Sheet: Table S1_DNase-seq experiments
replicate	biosample	experiment	celltype	cellname	Cell name in HiChIP
ENCFF000SEY	ENCBS619AAA	ENCSR000EIH	CL:0002539	Aortic smooth muscle cell	HCASMC
ENCFF000SEZ	ENCBS619AAA	ENCSR000EIH	CL:0002539	Aortic smooth muscle cell	HCASMC
ENCFF198FEP	ENCBS117TZS	ENCSR643GHI	CL:0000492	CD4-positive helper T cell	MyLa
ENCFF353WCX	ENCBS517HTQ	ENCSR425MRQ	CL:0000492	CD4-positive helper T cell	MyLa
ENCFF905PBC	ENCBS103XXU	ENCSR569ATD	CL:0000492	CD4-positive helper T cell	MyLa
ENCFF001CTZ	ENCBS110ENC	ENCSR000EMT	EFO:0002784	GM12878	GM12878
ENCFF001CUI	ENCBS857VGC	ENCSR000EMT	EFO:0002784	GM12878	GM12878
ENCFF905ASU	ENCBS857VGC	ENCSR000EMT	EFO:0002784	GM12878	GM12878
ENCFF996CVE	ENCBS110ENC	ENCSR000EMT	EFO:0002784	GM12878	GM12878
ENCFF001BSI	ENCBS039ENC	ENCSR000EPC	EFO:0002067	K562	K562
ENCFF001DOX	ENCBS039ENC	ENCSR000EPC	EFO:0002067	K562	K562
ENCFF001DPC	ENCBS025CUE	ENCSR000EPC	EFO:0002067	K562	K562
ENCFF484USH	ENCBS025CUE	ENCSR000EPC	EFO:0002067	K562	K562
ENCFF635BQF	ENCBS039ENC	ENCSR000EPC	EFO:0002067	K562	K562
ENCFF001AUG	ENCBS119AAA	ENCSR000EML	CL:0000895	Naive thymus-derived CD4-positive, alpha-beta T cell	Naïve
ENCFF001CQR	ENCBS119AAA	ENCSR000EML	CL:0000895	Naive thymus-derived CD4-positive, alpha-beta T cell	Naïve
ENCFF001CQW	ENCBS120AAA	ENCSR000EMM	CL:0000895	Naive thymus-derived CD4-positive, alpha-beta T cell	Naïve
ENCFF991FIW	ENCBS120AAA	ENCSR000EMM	CL:0000895	Naive thymus-derived CD4-positive, alpha-beta T cell	Naïve
ENCFF001CLN	ENCBS366AAA	ENCSR000EQJ	CL:0000815	Regulatory T cell	Treg
ENCFF001EKD	ENCBS366AAA	ENCSR000EQJ	CL:0000815	Regulatory T cell	Treg
ENCFF001EKR	ENCBS154AAA	ENCSR000EQK	CL:0000815	Regulatory T cell	Treg
ENCFF321TWD	ENCBS154AAA	ENCSR000EQK	CL:0000815	Regulatory T cell	Treg
ENCFF001CHF	ENCBS364AAA	ENCSR000EQF	CL:0000899	T-helper 17 cell	Th17
ENCFF001EHZ	ENCBS364AAA	ENCSR000EQF	CL:0000899	T-helper 17 cell	Th17

## Sheet: Table S2_Histone experiments
file accession	biosample	experiment	target	cell type	cell line	cell info	organism
ENCFF324SLX	ENCBS401ZBX	ENCSR307DQT	H3K27ac-human	EFO:0002357	SUDHL6	immortalized cell line	Homo sampiens
ENCFF149LWO	ENCBS782RBW	ENCSR307DQT	H3K27ac-human	EFO:0002357	SUDHL6	immortalized cell line	Homo sampiens
ENCFF236RNZ	ENCBS018GXW	ENCSR857GMX	H3K27ac-human	EFO:0006710	OCI-LY3	immortalized cell line	Homo sampiens
ENCFF056MQP	ENCBS757GPD	ENCSR857GMX	H3K27ac-human	EFO:0006710	OCI-LY3	immortalized cell line	Homo sampiens
ENCFF249JEZ	ENCBS481AAA	ENCSR000FCH	H3K27ac-human	EFO:0001182	HEK293	immortalized cell line	Homo sampiens
ENCFF452WMV	ENCBS486AAA	ENCSR000FCH	H3K27ac-human	EFO:0001182	HEK293	immortalized cell line	Homo sampiens
ENCFF247LYH	ENCBS869LIS	ENCSR719FEJ	H3K27ac-human	EFO:0006283	KOPT-K1	immortalized cell line	Homo sampiens
ENCFF317UFM	ENCBS345YKN	ENCSR719FEJ	H3K27ac-human	EFO:0006283	KOPT-K1	immortalized cell line	Homo sampiens
ENCFF926JXO	ENCBS703OTV	ENCSR318HUC	H3K27ac-human	UBERON:0001515	Thoracic aorta	tissue	Homo sampiens
ENCFF970ZBI	ENCBS766ILR	ENCSR837SGJ	H3K27ac-human	UBERON:0001211	Peyer's patch	tissue	Homo sampiens
ENCFF000VJE	ENCBS729QZR	ENCSR000EXK	H3K27ac-human	EFO:0002713	Panc1	immortalized cell line	Homo sampiens
ENCFF000VJG	ENCBS729QZR	ENCSR000EXK	H3K27ac-human	EFO:0002713	Panc1	immortalized cell line	Homo sampiens
ENCFF364PAM	ENCBS494OPB	ENCSR661KMA	H3K27ac-human	EFO:0002824	HCT116	immortalized cell line	Homo sampiens
ENCFF823CSZ	ENCBS847SOB	ENCSR661KMA	H3K27ac-human	EFO:0002824	HCT116	immortalized cell line	Homo sampiens
ENCFF710LJR	ENCBS741FXQ	ENCSR092TTO	H3K27ac-human	NTR:0003830	Mid-neurogenesis radial glial cells	in vitro differentiated cells	Homo sampiens
ENCFF369TLG	ENCBS908BQA	ENCSR092TTO	H3K27ac-human	NTR:0003830	Mid-neurogenesis radial glial cells	in vitro differentiated cells	Homo sampiens
ENCFF994ZSL	ENCBS908BQA	ENCSR092TTO	H3K27ac-human	NTR:0003830	Mid-neurogenesis radial glial cells	in vitro differentiated cells	Homo sampiens
ENCFF667SOQ	ENCBS324TZB	ENCSR564IGJ	H3K27ac-human	EFO:0003072	SK-N-SH	immortalized cell line	Homo sampiens
ENCFF339DNI	ENCBS500EWH	ENCSR564IGJ	H3K27ac-human	EFO:0003072	SK-N-SH	immortalized cell line	Homo sampiens
ENCFF000BOI	ENCBS276EMT	ENCSR000ANV	H3K27ac-human	CL:0002372	Myotube	in vitro differentiated cells	Homo sampiens
ENCFF000BOJ	ENCBS639UHS	ENCSR000ANV	H3K27ac-human	CL:0002372	Myotube	in vitro differentiated cells	Homo sampiens
ENCFF040NGJ	ENCBS385OLC	ENCSR714TJD	H3K27ac-human	EFO:0002106	A673	immortalized cell line	Homo sampiens
ENCFF416TYB	ENCBS615MBV	ENCSR714TJD	H3K27ac-human	EFO:0002106	A673	immortalized cell line	Homo sampiens
ENCFF001ENH	ENCBS004ENC	ENCSR000DPL	H3K27ac-human	CL:0002553	Fibroblast of lung	primary cell	Homo sampiens
ENCFF639QXV	ENCBS056PYD	ENCSR847AIA	H3K27ac-human	UBERON:0002369	Adrenal gland	tissue	Homo sampiens
ENCFF000CGX	ENCBS020ENC	ENCSR000AOQ	H3K27ac-human	CL:0000127	Astrocyte	primary cell	Homo sampiens
ENCFF000CGZ	ENCBS096LWS	ENCSR000AOQ	H3K27ac-human	CL:0000127	Astrocyte	primary cell	Homo sampiens
ENCFF623AQQ	ENCBS586ZNR	ENCSR875QDS	H3K27ac-human	EFO:0007098	iPS DF 6.9	induced pluripotent stem cell line	Homo sampiens
ENCFF039JZT	ENCBS359OQR	ENCSR748TFF	H3K27ac-human	UBERON:0001150	Body of pancreas	tissue	Homo sampiens
ENCFF226TTG	ENCBS474IPU	ENCSR443UYU	H3K27ac-human	UBERON:0001621	Coronary artery	tissue	Homo sampiens
ENCFF220TNE	ENCBS263ACC	ENCSR801IPH	H3K27ac-human	UBERON:0011907	Gastrocnemius medialis	tissue	Homo sampiens
ENCFF040TJZ	ENCBS861DVK	ENCSR801IPH	H3K27ac-human	UBERON:0011907	Gastrocnemius medialis	tissue	Homo sampiens
ENCFF655YQF	ENCBS273PSC	ENCSR982QIF	H3K27ac-human	UBERON:0001496	Ascending aorta	tissue	Homo sampiens
ENCFF562NOM	ENCBS054JUC	ENCSR909UAG	H3K27ac-human	UBERON:0006920	Esophagus squamous epithelium	tissue	Homo sampiens
ENCFF986TAX	ENCBS913XPU	ENCSR726HTS	H3K27ac-human	UBERON:0002106	Spleen	tissue	Homo sampiens
ENCFF354RIN	ENCBS562NPI	ENCSR842NGQ	H3K27ac-human	CL:0002259	Neuroepithelial stem cell	in vitro differentiated cells	Homo sampiens
ENCFF389PQC	ENCBS592DOF	ENCSR842NGQ	H3K27ac-human	CL:0002259	Neuroepithelial stem cell	in vitro differentiated cells	Homo sampiens
ENCFF492XPT	ENCBS374AAA	ENCSR905TYC	H3K27ac-human	NTR:0000560	Bipolar spindle neuron	in vitro differentiated cells	Homo sampiens
ENCFF940AWR	ENCBS369AAA	ENCSR905TYC	H3K27ac-human	NTR:0000560	Bipolar spindle neuron	in vitro differentiated cells	Homo sampiens
ENCFF070MRW	ENCBS130NHB	ENCSR189QAD	H3K27ac-human	UBERON:0002369	Adrenal gland	tissue	Homo sampiens
ENCFF152QOQ	ENCBS684YJH	ENCSR738SXD	H3K27ac-human	UBERON:0008952	Upper lobe of left lung	tissue	Homo sampiens
ENCFF395RUY	ENCBS536THV	ENCSR981UJA	H3K27ac-human	UBERON:0001114	Right lobe of liver	tissue	Homo sampiens
ENCFF855KHN	ENCBS536THV	ENCSR981UJA	H3K27ac-human	UBERON:0001114	Right lobe of liver	tissue	Homo sampiens
ENCFF273NZY	ENCBS469FLQ	ENCSR249INE	H3K27ac-human	UBERON:0000995	Uterus	tissue	Homo sampiens
ENCFF925IAZ	ENCBS071FUE	ENCSR095YMD	H3K27ac-human	UBERON:0004648	Esophagus muscularis mucosa	tissue	Homo sampiens
ENCFF046PRU	ENCBS343AKO	ENCSR000NPF	H3K27ac-human	CL:0000746	Cardiac muscle cell	in vitro differentiated cells	Homo sampiens
ENCFF328PWM	ENCBS806KLM	ENCSR000NPF	H3K27ac-human	CL:0000746	Cardiac muscle cell	in vitro differentiated cells	Homo sampiens
ENCFF000AKF	ENCBS161AAA	ENCSR000AUI	H3K27ac-human	EFO:0001086	A549	immortalized cell line	Homo sampiens
ENCFF000AKI	ENCBS161AAA	ENCSR000AUI	H3K27ac-human	EFO:0001086	A549	immortalized cell line	Homo sampiens
ENCFF945UYG	ENCBS451OVM	ENCSR826UTD	H3K27ac-human	EFO:0002074	PC-3	immortalized cell line	Homo sampiens
ENCFF681OSL	ENCBS596CTT	ENCSR826UTD	H3K27ac-human	EFO:0002074	PC-3	immortalized cell line	Homo sampiens
ENCFF665GXM	ENCBS628VEX	ENCSR082SHT	H3K27ac-human	UBERON:0001013	Adipose	tissue	Homo sampiens
ENCFF712IRY	ENCBS241TLI	ENCSR758OEC	H3K27ac-human	EFO:0005724	MM.1S	immortalized cell line	Homo sampiens
ENCFF014EKJ	ENCBS981ZAE	ENCSR758OEC	H3K27ac-human	EFO:0005724	MM.1S	immortalized cell line	Homo sampiens
ENCFF570OTY	ENCBS433LAO	ENCSR034ZKE	H3K27ac-human	UBERON:0008367	Breast epithelium	tissue	Homo sampiens
ENCFF668VJS	ENCBS765HGS	ENCSR208QRN	H3K27ac-human	UBERON:0001157	Transverse colon	tissue	Homo sampiens
ENCFF250TIL	ENCBS555KUV	ENCSR268ZCF	H3K27ac-human	UBERON:0001159	Sigmoid colon	tissue	Homo sampiens
ENCFF119ZDZ	ENCBS171YVY	ENCSR660IQS	H3K27ac-human	EFO:0005719	Karpas-422	immortalized cell line	Homo sampiens
ENCFF671FAG	ENCBS850UIV	ENCSR660IQS	H3K27ac-human	EFO:0005719	Karpas-422	immortalized cell line	Homo sampiens
ENCFF536UCA	ENCBS170DPY	ENCSR566GSO	H3K27ac-human	EFO:0007112	Loucy	immortalized cell line	Homo sampiens
ENCFF786NKX	ENCBS080PZG	ENCSR566GSO	H3K27ac-human	EFO:0007112	Loucy	immortalized cell line	Homo sampiens
ENCFF404WCX	ENCBS248LIK	ENCSR771YJT	H3K27ac-human	UBERON:0001323	Tibial nerve	tissue	Homo sampiens
ENCFF062XGN	ENCBS232HQQ	ENCSR094VJC	H3K27ac-human	UBERON:0002369	Adrenal gland	tissue	Homo sampiens
ENCFF224YOO	ENCBS693QTT	ENCSR948YYZ	H3K27ac-human	UBERON:0011907	Gastrocnemius medialis	tissue	Homo sampiens
ENCFF105LMV	ENCBS693QTT	ENCSR948YYZ	H3K27ac-human	UBERON:0011907	Gastrocnemius medialis	tissue	Homo sampiens
ENCFF488IPX	ENCBS522TJW	ENCSR597BWL	H3K27ac-human	UBERON:0002046	Thyroid gland	tissue	Homo sampiens
ENCFF424LMQ	ENCBS522TJW	ENCSR597BWL	H3K27ac-human	UBERON:0002046	Thyroid gland	tissue	Homo sampiens
ENCFF998QZR	ENCBS077RUJ	ENCSR507UDH	H3K27ac-human	CL:0000182	Hepatocyte	in vitro differentiated cells	Homo sampiens
ENCFF774ZCQ	ENCBS520VFV	ENCSR507UDH	H3K27ac-human	CL:0000182	Hepatocyte	in vitro differentiated cells	Homo sampiens
ENCFF000APY	ENCBS282AAA	ENCSR000AQW	H3K27ac-human	EFO:0007074	DND-41	immortalized cell line	Homo sampiens
ENCFF000APZ	ENCBS688JZQ	ENCSR000AQW	H3K27ac-human	EFO:0007074	DND-41	immortalized cell line	Homo sampiens
ENCFF201SGB	ENCBS282AAA	ENCSR000AQW	H3K27ac-human	EFO:0007074	DND-41	immortalized cell line	Homo sampiens
ENCFF228RCK	ENCBS688JZQ	ENCSR000AQW	H3K27ac-human	EFO:0007074	DND-41	immortalized cell line	Homo sampiens
ENCFF864OUU	ENCBS869MHP	ENCSR520BIM	H3K27ac-human	UBERON:0001150	Body of pancreas	tissue	Homo sampiens
ENCFF683HLQ	ENCBS869MHP	ENCSR520BIM	H3K27ac-human	UBERON:0001150	Body of pancreas	tissue	Homo sampiens
ENCFF918LIT	ENCBS328HPC	ENCSR069UMW	H3K27ac-human	UBERON:0001496	Ascending aorta	tissue	Homo sampiens
ENCFF684USK	ENCBS586UUR	ENCSR716FUH	H3K27ac-human	UBERON:0002046	Thyroid gland	tissue	Homo sampiens
ENCFF212KII	ENCBS780PCJ	ENCSR210ZPC	H3K27ac-human	CL:0000192	Smooth muscle cell	in vitro differentiated cells	Homo sampiens
ENCFF767OHX	ENCBS899TTJ	ENCSR210ZPC	H3K27ac-human	CL:0000192	Smooth muscle cell	in vitro differentiated cells	Homo sampiens
ENCFF508UMT	ENCBS018TPT	ENCSR449AXO	H3K27ac-human	NTR:0000711	Neural progenitor cell	in vitro differentiated cells	Homo sampiens
ENCFF564EPQ	ENCBS044KWE	ENCSR449AXO	H3K27ac-human	NTR:0000711	Neural progenitor cell	in vitro differentiated cells	Homo sampiens
ENCFF585EBV	ENCBS139WGU	ENCSR734UYL	H3K27ac-human	EFO:0001086	A549	immortalized cell line	Homo sampiens
ENCFF529ASS	ENCBS543OJU	ENCSR015GFK	H3K27ac-human	UBERON:0001515	Thoracic aorta	tissue	Homo sampiens
ENCFF492FMY	ENCBS543OJU	ENCSR015GFK	H3K27ac-human	UBERON:0001515	Thoracic aorta	tissue	Homo sampiens
ENCFF824HIQ	ENCBS987JQH	ENCSR769FOC	H3K27ac-human	EFO:0002847	PC-9	immortalized cell line	Homo sampiens
ENCFF079DIA	ENCBS177ANS	ENCSR769FOC	H3K27ac-human	EFO:0002847	PC-9	immortalized cell line	Homo sampiens
ENCFF855RCK	ENCBS789UPK	ENCSR752UOD	H3K27ac-human	EFO:0001203	MCF-7	immortalized cell line	Homo sampiens
ENCFF761EUR	ENCBS967MVZ	ENCSR752UOD	H3K27ac-human	EFO:0001203	MCF-7	immortalized cell line	Homo sampiens
ENCFF353UBN	ENCBS209WBW	ENCSR596PFU	H3K27ac-human	UBERON:0001150	Body of pancreas	tissue	Homo sampiens
ENCFF878RPY	ENCBS703ZDS	ENCSR566DVZ	H3K27ac-human	EFO:0003045	H9	stem cell	Homo sampiens
ENCFF963BLN	ENCBS769EPD	ENCSR566DVZ	H3K27ac-human	EFO:0003045	H9	stem cell	Homo sampiens
ENCFF191ITJ	ENCBS019YGN	ENCSR498ZRC	H3K27ac-human	UBERON:0001987	Placenta	tissue	Homo sampiens
ENCFF163IBV	ENCBS050AKF	ENCSR203KCB	H3K27ac-human	UBERON:0002046	Thyroid gland	tissue	Homo sampiens
ENCFF657EXB	ENCBS050AKF	ENCSR203KCB	H3K27ac-human	UBERON:0002046	Thyroid gland	tissue	Homo sampiens
ENCFF000AKB	ENCBS160AAA	ENCSR000AVF	H3K27ac-human	EFO:0001086	A549	immortalized cell line	Homo sampiens
ENCFF000AKD	ENCBS160AAA	ENCSR000AVF	H3K27ac-human	EFO:0001086	A549	immortalized cell line	Homo sampiens
ENCFF702LLO	ENCBS827JIC	ENCSR059MVB	H3K27ac-human	EFO:0007070	ACC112	immortalized cell line	Homo sampiens
ENCFF601EQE	ENCBS726UUU	ENCSR059MVB	H3K27ac-human	EFO:0007070	ACC112	immortalized cell line	Homo sampiens
ENCFF016PVN	ENCBS682HMC	ENCSR955IXZ	H3K27ac-human	EFO:0005694	KMS-11	immortalized cell line	Homo sampiens
ENCFF261PEE	ENCBS987CHP	ENCSR955IXZ	H3K27ac-human	EFO:0005694	KMS-11	immortalized cell line	Homo sampiens
ENCFF345SWP	ENCBS372AAA	ENCSR007YOT	H3K27ac-human	CL:2000015	Fibroblast of arm	primary cell	Homo sampiens
ENCFF612WGP	ENCBS367AAA	ENCSR007YOT	H3K27ac-human	CL:2000015	Fibroblast of arm	primary cell	Homo sampiens
ENCFF861EWI	ENCBS772AEX	ENCSR829UDX	H3K27ac-human	CL:0000681	Radial glial cell	in vitro differentiated cells	Homo sampiens
ENCFF171RVE	ENCBS108RIC	ENCSR829UDX	H3K27ac-human	CL:0000681	Radial glial cell	in vitro differentiated cells	Homo sampiens
ENCFF549QTQ	ENCBS886BJZ	ENCSR447ZGY	H3K27ac-human	EFO:0006711	OCI-LY7	immortalized cell line	Homo sampiens
ENCFF093GVO	ENCBS006VZG	ENCSR447ZGY	H3K27ac-human	EFO:0006711	OCI-LY7	immortalized cell line	Homo sampiens
ENCFF000BKV	ENCBS023XCT	ENCSR000ANF	H3K27ac-human	CL:0000515	Skeletal muscle myoblast	primary cell	Homo sampiens
ENCFF000BKW	ENCBS914GNL	ENCSR000ANF	H3K27ac-human	CL:0000515	Skeletal muscle myoblast	primary cell	Homo sampiens
ENCFF000VCN	ENCBS409MTT	ENCSR000EUT	H3K27ac-human	EFO:0002824	HCT116	immortalized cell line	Homo sampiens
ENCFF000VCO	ENCBS409MTT	ENCSR000EUT	H3K27ac-human	EFO:0002824	HCT116	immortalized cell line	Homo sampiens
ENCFF150HRE	ENCBS078MQQ	ENCSR177QFY	H3K27ac-human	UBERON:0002369	Adrenal gland	tissue	Homo sampiens
ENCFF521ZHZ	ENCBS078MQQ	ENCSR177QFY	H3K27ac-human	UBERON:0002369	Adrenal gland	tissue	Homo sampiens
ENCFF925XNY	ENCBS642ZQR	ENCSR133NBJ	H3K27ac-human	UBERON:0000945	Stomach	tissue	Homo sampiens
ENCFF164FND	ENCBS493WOF	ENCSR593KDJ	H3K27ac-human	UBERON:0006631	Right atrium auricular region	tissue	Homo sampiens
ENCFF594GSQ	ENCBS397COL	ENCSR597UDW	H3K27ac-human	EFO:0005907	OCI-LY1	immortalized cell line	Homo sampiens
ENCFF884LKB	ENCBS945KYE	ENCSR597UDW	H3K27ac-human	EFO:0005907	OCI-LY1	immortalized cell line	Homo sampiens
ENCFF283UZD	ENCBS866HOM	ENCSR736ALU	H3K27ac-human	UBERON:0011907	Gastrocnemius medialis	tissue	Homo sampiens
ENCFF105HMV	ENCBS866HOM	ENCSR736ALU	H3K27ac-human	UBERON:0011907	Gastrocnemius medialis	tissue	Homo sampiens
ENCFF274TNM	ENCBS100ZVH	ENCSR741STU	H3K27ac-human	EFO:0002167	DOHH2	immortalized cell line	Homo sampiens
ENCFF821QHG	ENCBS662OGM	ENCSR741STU	H3K27ac-human	EFO:0002167	DOHH2	immortalized cell line	Homo sampiens
ENCFF037SCG	ENCBS373AAA	ENCSR729ENO	H3K27ac-human	EFO:0004905	Induced pluripotent stem cell	induced pluripotent stem cell line	Homo sampiens
ENCFF794OAC	ENCBS368AAA	ENCSR729ENO	H3K27ac-human	EFO:0004905	Induced pluripotent stem cell	induced pluripotent stem cell line	Homo sampiens
ENCFF814JSE	ENCBS203EZT	ENCSR835MMN	H3K27ac-human	EFO:0002860	SK-N-MC	immortalized cell line	Homo sampiens
ENCFF818VJD	ENCBS273LIC	ENCSR835MMN	H3K27ac-human	EFO:0002860	SK-N-MC	immortalized cell line	Homo sampiens
ENCFF995OXQ	ENCBS861XCF	ENCSR854OXF	H3K27ac-human	UBERON:0002084	Heart left ventricle	tissue	Homo sampiens
ENCFF883HPL	ENCBS783BYN	ENCSR677LBH	H3K27ac-human	UBERON:0004550	Gastroesophageal sphincter	tissue	Homo sampiens
ENCFF542EXN	ENCBS047TWL	ENCSR718BTD	H3K27ac-human	UBERON:0000996	Vagina	tissue	Homo sampiens
ENCFF834JHG	ENCBS047TWL	ENCSR718BTD	H3K27ac-human	UBERON:0000996	Vagina	tissue	Homo sampiens
ENCFF811QNM	ENCBS504GFW	ENCSR124VOE	H3K27ac-human	CL:0002319	Neural cell	in vitro differentiated cells	Homo sampiens
ENCFF627PAM	ENCBS737HIZ	ENCSR124VOE	H3K27ac-human	CL:0002319	Neural cell	in vitro differentiated cells	Homo sampiens
ENCFF000CEF	ENCBS865RXK	ENCSR000ASJ	H3K27ac-human	CL:0001054	Monocytes-CD14+	primary cell	Homo sampiens
ENCFF000CEG	ENCBS188BKX	ENCSR000ASJ	H3K27ac-human	CL:0001054	Monocytes-CD14+	primary cell	Homo sampiens
ENCFF000BBM	ENCBS075PNA	ENCSR000AOC	H3K27ac-human	EFO:0002791	HeLa-S3	immortalized cell line	Homo sampiens
ENCFF000BBN	ENCBS655ARO	ENCSR000AOC	H3K27ac-human	EFO:0002791	HeLa-S3	immortalized cell line	Homo sampiens
ENCFF000BHY	ENCBS045GHW	ENCSR000ALW	H3K27ac-human	CL:0002327	Mammary epithelial cell	primary cell	Homo sampiens
ENCFF000BHZ	ENCBS091ENC	ENCSR000ALW	H3K27ac-human	CL:0002327	Mammary epithelial cell	primary cell	Homo sampiens
ENCFF635SNH	ENCBS364KFR	ENCSR054BKO	H3K27ac-human	UBERON:0001255	Urinary bladder	tissue	Homo sampiens
ENCFF506YDW	ENCBS012DXH	ENCSR013KEC	H3K27ac-human	EFO:0000586	Mesenchymal stem cell	in vitro differentiated cells	Homo sampiens
ENCFF955GFR	ENCBS725VAK	ENCSR013KEC	H3K27ac-human	EFO:0000586	Mesenchymal stem cell	in vitro differentiated cells	Homo sampiens
ENCFF000ASG	ENCBS830CIQ	ENCSR000AKC	H3K27ac-human	EFO:0002784	GM12878	immortalized cell line	Homo sampiens
ENCFF000ASI	ENCBS715VCP	ENCSR000AKC	H3K27ac-human	EFO:0002784	GM12878	immortalized cell line	Homo sampiens
ENCFF882PRP	ENCBS830CIQ	ENCSR000AKC	H3K27ac-human	EFO:0002784	GM12878	immortalized cell line	Homo sampiens
ENCFF197QHX	ENCBS715VCP	ENCSR000AKC	H3K27ac-human	EFO:0002784	GM12878	immortalized cell line	Homo sampiens
ENCFF471QZV	ENCBS463LFL	ENCSR429YAE	H3K27ac-human	EFO:0007105	iPS-18a	induced pluripotent stem cell line	Homo sampiens
ENCFF000CRJ	ENCBS149EDI	ENCSR000AMR	H3K27ac-human	CL:0002553	Fibroblast of lung	primary cell	Homo sampiens
ENCFF000CRK	ENCBS339AAA	ENCSR000AMR	H3K27ac-human	CL:0002553	Fibroblast of lung	primary cell	Homo sampiens
ENCFF000CJW	ENCBS311WGW	ENCSR000APN	H3K27ac-human	CL:0002551	Fibroblast of dermis	primary cell	Homo sampiens
ENCFF000CKA	ENCBS617RCN	ENCSR000APN	H3K27ac-human	CL:0002551	Fibroblast of dermis	primary cell	Homo sampiens
ENCFF000VFM	ENCBS105ENC	ENCSR000EWR	H3K27ac-human	EFO:0001203	MCF-7	immortalized cell line	Homo sampiens
ENCFF000VFN	ENCBS105ENC	ENCSR000EWR	H3K27ac-human	EFO:0001203	MCF-7	immortalized cell line	Homo sampiens
ENCFF000AWF	ENCBS718AAA	ENCSR000ANP	H3K27ac-human	EFO:0003042	H1-hESC	stem cell	Homo sampiens
ENCFF000AWG	ENCBS718AAA	ENCSR000ANP	H3K27ac-human	EFO:0003042	H1-hESC	stem cell	Homo sampiens
ENCFF948TVI	ENCBS718AAA	ENCSR000ANP	H3K27ac-human	EFO:0003042	H1-hESC	stem cell	Homo sampiens
ENCFF661NZB	ENCBS718AAA	ENCSR000ANP	H3K27ac-human	EFO:0003042	H1-hESC	stem cell	Homo sampiens
ENCFF775ONB	ENCBS532LWE	ENCSR876RGF	H3K27ac-human	EFO:0003045	H9	stem cell	Homo sampiens
ENCFF930EEK	ENCBS808UWK	ENCSR876RGF	H3K27ac-human	EFO:0003045	H9	stem cell	Homo sampiens
ENCFF000BRQ	ENCBS717AAA	ENCSR000ALB	H3K27ac-human	CL:0002618	Endothelial cell of umbilical vein	primary cell	Homo sampiens
ENCFF000BRR	ENCBS717AAA	ENCSR000ALB	H3K27ac-human	CL:0002618	Endothelial cell of umbilical vein	primary cell	Homo sampiens
ENCFF000BRS	ENCBS717AAA	ENCSR000ALB	H3K27ac-human	CL:0002618	Endothelial cell of umbilical vein	primary cell	Homo sampiens
ENCFF904SZU	ENCBS492AAA	ENCSR000FCU	H3K27ac-human	EFO:0003072	SK-N-SH	immortalized cell line	Homo sampiens
ENCFF972XSR	ENCBS495AAA	ENCSR000FCU	H3K27ac-human	EFO:0003072	SK-N-SH	immortalized cell line	Homo sampiens
ENCFF000CMZ	ENCBS585ENC	ENCSR000ALK	H3K27ac-human	CL:0000312	Keratinocyte	primary cell	Homo sampiens
ENCFF000CNA	ENCBS584ENC	ENCSR000ALK	H3K27ac-human	CL:0000312	Keratinocyte	primary cell	Homo sampiens
ENCFF000CNC	ENCBS935RSN	ENCSR000ALK	H3K27ac-human	CL:0000312	Keratinocyte	primary cell	Homo sampiens
ENCFF563GHN	ENCBS606XXJ	ENCSR729GQT	H3K27ac-human	EFO:0007108	iPS-20b	induced pluripotent stem cell line	Homo sampiens
ENCFF986MXJ	ENCBS302TYA	ENCSR200ETW	H3K27ac-human	EFO:0007090	HUES64-derived CD184+	in vitro differentiated cells	Homo sampiens
ENCFF232NSN	ENCBS820BQB	ENCSR200ETW	H3K27ac-human	EFO:0007090	HUES64-derived CD184+	in vitro differentiated cells	Homo sampiens
ENCFF000CVH	ENCBS341AAA	ENCSR000APH	H3K27ac-human	CL:0000062	Osteoblast	primary cell	Homo sampiens
ENCFF000CVJ	ENCBS653BJC	ENCSR000APH	H3K27ac-human	CL:0000062	Osteoblast	primary cell	Homo sampiens
ENCFF000ANG	ENCBS836CYW	ENCSR000AUP	H3K27ac-human	CL:0000236	B cell	primary cell	Homo sampiens
ENCFF000ANK	ENCBS400ARI	ENCSR000AUP	H3K27ac-human	CL:0000236	B cell	primary cell	Homo sampiens
ENCFF000BEZ	ENCBS295NFS	ENCSR000AMO	H3K27ac-human	EFO:0001187	HepG2	immortalized cell line	Homo sampiens
ENCFF000BFB	ENCBS743JKX	ENCSR000AMO	H3K27ac-human	EFO:0001187	HepG2	immortalized cell line	Homo sampiens
ENCFF638JUP	ENCBS295NFS	ENCSR000AMO	H3K27ac-human	EFO:0001187	HepG2	immortalized cell line	Homo sampiens
ENCFF208LPX	ENCBS743JKX	ENCSR000AMO	H3K27ac-human	EFO:0001187	HepG2	immortalized cell line	Homo sampiens
ENCFF000BWX	ENCBS674MPN	ENCSR000AKP	H3K27ac-human	EFO:0002067	K562	immortalized cell line	Homo sampiens
ENCFF000BWZ	ENCBS639AAA	ENCSR000AKP	H3K27ac-human	EFO:0002067	K562	immortalized cell line	Homo sampiens
ENCFF964BVT	ENCBS921VGK	ENCSR267YXV	H3K27ac-human	CL:0000775	Neutrophil	primary cell	Homo sampiens
ENCFF801OZE	ENCBS360EQL	ENCSR267YXV	H3K27ac-human	CL:0000775	Neutrophil	primary cell	Homo sampiens
ENCFF841WGY	ENCBS100ZVH	ENCSR992YSL	H3K4me2-human	EFO:0002167	DOHH2	immortalized cell line	Homo sampiens
ENCFF872PRM	ENCBS662OGM	ENCSR992YSL	H3K4me2-human	EFO:0002167	DOHH2	immortalized cell line	Homo sampiens
ENCFF000CKO	ENCBS311WGW	ENCSR000APQ	H3K4me2-human	CL:0002551	Fibroblast of dermis	primary cell	Homo sampiens
ENCFF000CKQ	ENCBS617RCN	ENCSR000APQ	H3K4me2-human	CL:0002551	Fibroblast of dermis	primary cell	Homo sampiens
ENCFF439DMO	ENCBS311WGW	ENCSR000APQ	H3K4me2-human	CL:0002551	Fibroblast of dermis	primary cell	Homo sampiens
ENCFF516TKM	ENCBS617RCN	ENCSR000APQ	H3K4me2-human	CL:0002551	Fibroblast of dermis	primary cell	Homo sampiens
ENCFF000BIV	ENCBS091ENC	ENCSR000AMK	H3K4me2-human	CL:0002327	Mammary epithelial cell	primary cell	Homo sampiens
ENCFF000BIX	ENCBS045GHW	ENCSR000AMK	H3K4me2-human	CL:0002327	Mammary epithelial cell	primary cell	Homo sampiens
ENCFF939RJO	ENCBS091ENC	ENCSR000AMK	H3K4me2-human	CL:0002327	Mammary epithelial cell	primary cell	Homo sampiens
ENCFF941OQA	ENCBS045GHW	ENCSR000AMK	H3K4me2-human	CL:0002327	Mammary epithelial cell	primary cell	Homo sampiens
ENCFF620HPW	ENCBS596CTT	ENCSR788EQL	H3K4me2-human	EFO:0002074	PC-3	immortalized cell line	Homo sampiens
ENCFF070YZI	ENCBS451OVM	ENCSR788EQL	H3K4me2-human	EFO:0002074	PC-3	immortalized cell line	Homo sampiens
ENCFF507DHX	ENCBS372AAA	ENCSR124MTJ	H3K4me2-human	CL:2000015	Fibroblast of arm	primary cell	Homo sampiens
ENCFF278VMX	ENCBS967MVZ	ENCSR875KOJ	H3K4me2-human	EFO:0001203	MCF-7	immortalized cell line	Homo sampiens
ENCFF437IPW	ENCBS789UPK	ENCSR875KOJ	H3K4me2-human	EFO:0001203	MCF-7	immortalized cell line	Homo sampiens
ENCFF637QQY	ENCBS757GPD	ENCSR701ZDB	H3K4me2-human	EFO:0006710	OCI-LY3	immortalized cell line	Homo sampiens
ENCFF870ZMH	ENCBS018GXW	ENCSR701ZDB	H3K4me2-human	EFO:0006710	OCI-LY3	immortalized cell line	Homo sampiens
ENCFF000COF	ENCBS650AAA	ENCSR000ALN	H3K4me2-human	CL:0000312	Keratinocyte	primary cell	Homo sampiens
ENCFF000COH	ENCBS650AAA	ENCSR000ALN	H3K4me2-human	CL:0000312	Keratinocyte	primary cell	Homo sampiens
ENCFF000COJ	ENCBS650AAA	ENCSR000ALN	H3K4me2-human	CL:0000312	Keratinocyte	primary cell	Homo sampiens
ENCFF497QKF	ENCBS650AAA	ENCSR000ALN	H3K4me2-human	CL:0000312	Keratinocyte	primary cell	Homo sampiens
ENCFF048WUM	ENCBS650AAA	ENCSR000ALN	H3K4me2-human	CL:0000312	Keratinocyte	primary cell	Homo sampiens
ENCFF978ESV	ENCBS650AAA	ENCSR000ALN	H3K4me2-human	CL:0000312	Keratinocyte	primary cell	Homo sampiens
ENCFF000BPI	ENCBS276EMT	ENCSR000ANY	H3K4me2-human	CL:0002372	Myotube	in vitro differentiated cells	Homo sampiens
ENCFF000BPJ	ENCBS639UHS	ENCSR000ANY	H3K4me2-human	CL:0002372	Myotube	in vitro differentiated cells	Homo sampiens
ENCFF726HPM	ENCBS276EMT	ENCSR000ANY	H3K4me2-human	CL:0002372	Myotube	in vitro differentiated cells	Homo sampiens
ENCFF872RBX	ENCBS639UHS	ENCSR000ANY	H3K4me2-human	CL:0002372	Myotube	in vitro differentiated cells	Homo sampiens
ENCFF000AMX	ENCBS836CYW	ENCSR000AUY	H3K4me2-human	CL:0000236	B cell	primary cell	Homo sampiens
ENCFF000AMY	ENCBS098ETX	ENCSR000AUY	H3K4me2-human	CL:0000236	B cell	primary cell	Homo sampiens
ENCFF296NYG	ENCBS836CYW	ENCSR000AUY	H3K4me2-human	CL:0000236	B cell	primary cell	Homo sampiens
ENCFF861KFA	ENCBS098ETX	ENCSR000AUY	H3K4me2-human	CL:0000236	B cell	primary cell	Homo sampiens
ENCFF000AIV	ENCBS161AAA	ENCSR000AVI	H3K4me2-human	EFO:0001086	A549	immortalized cell line	Homo sampiens
ENCFF000AIY	ENCBS161AAA	ENCSR000AVI	H3K4me2-human	EFO:0001086	A549	immortalized cell line	Homo sampiens
ENCFF700NZJ	ENCBS161AAA	ENCSR000AVI	H3K4me2-human	EFO:0001086	A549	immortalized cell line	Homo sampiens
ENCFF471RCX	ENCBS161AAA	ENCSR000AVI	H3K4me2-human	EFO:0001086	A549	immortalized cell line	Homo sampiens
ENCFF776TRZ	ENCBS520VFV	ENCSR220XCD	H3K4me2-human	CL:0000182	Hepatocyte	in vitro differentiated cells	Homo sampiens
ENCFF728YWL	ENCBS077RUJ	ENCSR220XCD	H3K4me2-human	CL:0000182	Hepatocyte	in vitro differentiated cells	Homo sampiens
ENCFF876PRA	ENCBS241TLI	ENCSR086YIH	H3K4me2-human	EFO:0005724	MM.1S	immortalized cell line	Homo sampiens
ENCFF646SDW	ENCBS981ZAE	ENCSR086YIH	H3K4me2-human	EFO:0005724	MM.1S	immortalized cell line	Homo sampiens
ENCFF000CDH	ENCBS188BKX	ENCSR000ATE	H3K4me2-human	CL:0001054	Monocytes-CD14+	primary cell	Homo sampiens
ENCFF000CDI	ENCBS865RXK	ENCSR000ATE	H3K4me2-human	CL:0001054	Monocytes-CD14+	primary cell	Homo sampiens
ENCFF397NPK	ENCBS188BKX	ENCSR000ATE	H3K4me2-human	CL:0001054	Monocytes-CD14+	primary cell	Homo sampiens
ENCFF478HMU	ENCBS865RXK	ENCSR000ATE	H3K4me2-human	CL:0001054	Monocytes-CD14+	primary cell	Homo sampiens
ENCFF000AIP	ENCBS160AAA	ENCSR000ATO	H3K4me2-human	EFO:0001086	A549	immortalized cell line	Homo sampiens
ENCFF000AIQ	ENCBS160AAA	ENCSR000ATO	H3K4me2-human	EFO:0001086	A549	immortalized cell line	Homo sampiens
ENCFF927EWB	ENCBS160AAA	ENCSR000ATO	H3K4me2-human	EFO:0001086	A549	immortalized cell line	Homo sampiens
ENCFF874VXV	ENCBS160AAA	ENCSR000ATO	H3K4me2-human	EFO:0001086	A549	immortalized cell line	Homo sampiens
ENCFF903BWK	ENCBS850UIV	ENCSR870IGD	H3K4me2-human	EFO:0005719	Karpas-422	immortalized cell line	Homo sampiens
ENCFF446MJU	ENCBS301UOD	ENCSR870IGD	H3K4me2-human	EFO:0005719	Karpas-422	immortalized cell line	Homo sampiens
ENCFF413PBI	ENCBS373AAA	ENCSR740FYN	H3K4me2-human	EFO:0004905	Induced pluripotent stem cell	induced pluripotent stem cell line	Homo sampiens
ENCFF276SHM	ENCBS368AAA	ENCSR740FYN	H3K4me2-human	EFO:0004905	Induced pluripotent stem cell	induced pluripotent stem cell line	Homo sampiens
ENCFF763TYC	ENCBS708EFA	ENCSR165LOF	H3K4me2-human	EFO:0007112	Loucy	immortalized cell line	Homo sampiens
ENCFF724AQB	ENCBS080PZG	ENCSR165LOF	H3K4me2-human	EFO:0007112	Loucy	immortalized cell line	Homo sampiens
ENCFF000BCF	ENCBS075PNA	ENCSR000AOE	H3K4me2-human	EFO:0002791	HeLa-S3	immortalized cell line	Homo sampiens
ENCFF000BCH	ENCBS655ARO	ENCSR000AOE	H3K4me2-human	EFO:0002791	HeLa-S3	immortalized cell line	Homo sampiens
ENCFF467RWV	ENCBS655ARO	ENCSR000AOE	H3K4me2-human	EFO:0002791	HeLa-S3	immortalized cell line	Homo sampiens
ENCFF477ACN	ENCBS075PNA	ENCSR000AOE	H3K4me2-human	EFO:0002791	HeLa-S3	immortalized cell line	Homo sampiens
ENCFF917GYL	ENCBS571AQH	ENCSR692HIO	H3K4me2-human	EFO:0001221	Myeloma	immortalized cell line	Homo sampiens
ENCFF009LSN	ENCBS197CBA	ENCSR692HIO	H3K4me2-human	EFO:0001221	Myeloma	immortalized cell line	Homo sampiens
ENCFF136URJ	ENCBS494OPB	ENCSR794ULT	H3K4me2-human	EFO:0002824	HCT116	immortalized cell line	Homo sampiens
ENCFF391TEP	ENCBS494OPB	ENCSR794ULT	H3K4me2-human	EFO:0002824	HCT116	immortalized cell line	Homo sampiens
ENCFF742QJO	ENCBS847SOB	ENCSR794ULT	H3K4me2-human	EFO:0002824	HCT116	immortalized cell line	Homo sampiens
ENCFF000BLT	ENCBS023XCT	ENCSR000ANJ	H3K4me2-human	CL:0000515	Skeletal muscle myoblast	primary cell	Homo sampiens
ENCFF000BLW	ENCBS914GNL	ENCSR000ANJ	H3K4me2-human	CL:0000515	Skeletal muscle myoblast	primary cell	Homo sampiens
ENCFF698BSH	ENCBS023XCT	ENCSR000ANJ	H3K4me2-human	CL:0000515	Skeletal muscle myoblast	primary cell	Homo sampiens
ENCFF076UEA	ENCBS914GNL	ENCSR000ANJ	H3K4me2-human	CL:0000515	Skeletal muscle myoblast	primary cell	Homo sampiens
ENCFF421GCQ	ENCBS401ZBX	ENCSR804MDH	H3K4me2-human	EFO:0002357	SUDHL6	immortalized cell line	Homo sampiens
ENCFF333ZDC	ENCBS107PVI	ENCSR804MDH	H3K4me2-human	EFO:0002357	SUDHL6	immortalized cell line	Homo sampiens
ENCFF845JBX	ENCBS504GFW	ENCSR045HLL	H3K4me2-human	CL:0002319	Neural cell	in vitro differentiated cells	Homo sampiens
ENCFF487ZJG	ENCBS737HIZ	ENCSR045HLL	H3K4me2-human	CL:0002319	Neural cell	in vitro differentiated cells	Homo sampiens
ENCFF101LNO	ENCBS886BJZ	ENCSR850QKN	H3K4me2-human	EFO:0006711	OCI-LY7	immortalized cell line	Homo sampiens
ENCFF631BBT	ENCBS121JKZ	ENCSR850QKN	H3K4me2-human	EFO:0006711	OCI-LY7	immortalized cell line	Homo sampiens
ENCFF742WHC	ENCBS018TPT	ENCSR645BCH	H3K4me2-human	NTR:0000711	Neural progenitor cell	in vitro differentiated cells	Homo sampiens
ENCFF625WDV	ENCBS044KWE	ENCSR645BCH	H3K4me2-human	NTR:0000711	Neural progenitor cell	in vitro differentiated cells	Homo sampiens
ENCFF000BSU	ENCBS717AAA	ENCSR000AKM	H3K4me2-human	CL:0002618	Endothelial cell of umbilical vein	primary cell	Homo sampiens
ENCFF000BSW	ENCBS717AAA	ENCSR000AKM	H3K4me2-human	CL:0002618	Endothelial cell of umbilical vein	primary cell	Homo sampiens
ENCFF841BJP	ENCBS717AAA	ENCSR000AKM	H3K4me2-human	CL:0002618	Endothelial cell of umbilical vein	primary cell	Homo sampiens
ENCFF148JMZ	ENCBS717AAA	ENCSR000AKM	H3K4me2-human	CL:0002618	Endothelial cell of umbilical vein	primary cell	Homo sampiens
ENCFF000AXD	ENCBS718AAA	ENCSR000ANC	H3K4me2-human	EFO:0003042	H1-hESC	stem cell	Homo sampiens
ENCFF000AXE	ENCBS718AAA	ENCSR000ANC	H3K4me2-human	EFO:0003042	H1-hESC	stem cell	Homo sampiens
ENCFF164TUS	ENCBS718AAA	ENCSR000ANC	H3K4me2-human	EFO:0003042	H1-hESC	stem cell	Homo sampiens
ENCFF000BXS	ENCBS674MPN	ENCSR000AKT	H3K4me2-human	EFO:0002067	K562	immortalized cell line	Homo sampiens
ENCFF000BXT	ENCBS639AAA	ENCSR000AKT	H3K4me2-human	EFO:0002067	K562	immortalized cell line	Homo sampiens
ENCFF408XXB	ENCBS674MPN	ENCSR000AKT	H3K4me2-human	EFO:0002067	K562	immortalized cell line	Homo sampiens
ENCFF475HIM	ENCBS639AAA	ENCSR000AKT	H3K4me2-human	EFO:0002067	K562	immortalized cell line	Homo sampiens
ENCFF000CSH	ENCBS149EDI	ENCSR000AMV	H3K4me2-human	CL:0002553	Fibroblast of lung	primary cell	Homo sampiens
ENCFF000CSI	ENCBS339AAA	ENCSR000AMV	H3K4me2-human	CL:0002553	Fibroblast of lung	primary cell	Homo sampiens
ENCFF227EHJ	ENCBS339AAA	ENCSR000AMV	H3K4me2-human	CL:0002553	Fibroblast of lung	primary cell	Homo sampiens
ENCFF376UFR	ENCBS149EDI	ENCSR000AMV	H3K4me2-human	CL:0002553	Fibroblast of lung	primary cell	Homo sampiens
ENCFF000CVX	ENCBS341AAA	ENCSR000APK	H3K4me2-human	CL:0000062	Osteoblast	primary cell	Homo sampiens
ENCFF000CWA	ENCBS653BJC	ENCSR000APK	H3K4me2-human	CL:0000062	Osteoblast	primary cell	Homo sampiens
ENCFF204IFH	ENCBS341AAA	ENCSR000APK	H3K4me2-human	CL:0000062	Osteoblast	primary cell	Homo sampiens
ENCFF939UEF	ENCBS653BJC	ENCSR000APK	H3K4me2-human	CL:0000062	Osteoblast	primary cell	Homo sampiens
ENCFF000ATG	ENCBS715VCP	ENCSR000AKG	H3K4me2-human	EFO:0002784	GM12878	immortalized cell line	Homo sampiens
ENCFF000ATH	ENCBS830CIQ	ENCSR000AKG	H3K4me2-human	EFO:0002784	GM12878	immortalized cell line	Homo sampiens
ENCFF058VSR	ENCBS830CIQ	ENCSR000AKG	H3K4me2-human	EFO:0002784	GM12878	immortalized cell line	Homo sampiens
ENCFF794KPF	ENCBS715VCP	ENCSR000AKG	H3K4me2-human	EFO:0002784	GM12878	immortalized cell line	Homo sampiens
ENCFF135OPH	ENCBS729LWO	ENCSR790EDQ	H3K4me2-human	EFO:0005907	OCI-LY1	immortalized cell line	Homo sampiens
ENCFF483XQD	ENCBS397COL	ENCSR790EDQ	H3K4me2-human	EFO:0005907	OCI-LY1	immortalized cell line	Homo sampiens
ENCFF000CGG	ENCBS248DIP	ENCSR000ARS	H3K4me2-human	CL:0000127	Astrocyte	primary cell	Homo sampiens
ENCFF000CGJ	ENCBS018VIR	ENCSR000ARS	H3K4me2-human	CL:0000127	Astrocyte	primary cell	Homo sampiens
ENCFF643NNL	ENCBS018VIR	ENCSR000ARS	H3K4me2-human	CL:0000127	Astrocyte	primary cell	Homo sampiens
ENCFF042DKS	ENCBS248DIP	ENCSR000ARS	H3K4me2-human	CL:0000127	Astrocyte	primary cell	Homo sampiens
ENCFF361KHB	ENCBS500EWH	ENCSR791INM	H3K4me2-human	EFO:0003072	SK-N-SH	immortalized cell line	Homo sampiens
ENCFF007WHO	ENCBS018DDZ	ENCSR791INM	H3K4me2-human	EFO:0003072	SK-N-SH	immortalized cell line	Homo sampiens
ENCFF154WBN	ENCBS369AAA	ENCSR821IAK	H3K4me2-human	NTR:0000560	Bipolar spindle neuron	in vitro differentiated cells	Homo sampiens
ENCFF797TXF	ENCBS374AAA	ENCSR821IAK	H3K4me2-human	NTR:0000560	Bipolar spindle neuron	in vitro differentiated cells	Homo sampiens
ENCFF314KRQ	ENCBS987JQH	ENCSR513KNS	H3K4me2-human	EFO:0002847	PC-9	immortalized cell line	Homo sampiens
ENCFF789FKN	ENCBS177ANS	ENCSR513KNS	H3K4me2-human	EFO:0002847	PC-9	immortalized cell line	Homo sampiens
ENCFF778XUA	ENCBS780PCJ	ENCSR783AXV	H3K4me2-human	CL:0000192	Smooth muscle cell	in vitro differentiated cells	Homo sampiens
ENCFF912EDV	ENCBS899TTJ	ENCSR783AXV	H3K4me2-human	CL:0000192	Smooth muscle cell	in vitro differentiated cells	Homo sampiens
ENCFF884KDU	ENCBS682HMC	ENCSR806XIU	H3K4me2-human	EFO:0005694	KMS-11	immortalized cell line	Homo sampiens
ENCFF120DWP	ENCBS987CHP	ENCSR806XIU	H3K4me2-human	EFO:0005694	KMS-11	immortalized cell line	Homo sampiens
ENCFF000AOX	ENCBS282AAA	ENCSR000AQZ	H3K4me2-human	EFO:0007074	DND-41	immortalized cell line	Homo sampiens
ENCFF000AOY	ENCBS688JZQ	ENCSR000AQZ	H3K4me2-human	EFO:0007074	DND-41	immortalized cell line	Homo sampiens
ENCFF605JFH	ENCBS688JZQ	ENCSR000AQZ	H3K4me2-human	EFO:0007074	DND-41	immortalized cell line	Homo sampiens
ENCFF002XUP	ENCBS282AAA	ENCSR000AQZ	H3K4me2-human	EFO:0007074	DND-41	immortalized cell line	Homo sampiens
ENCFF580UTN	ENCBS776ACY	ENCSR486GWT	H3K4me2-human	CL:0000047	Neuronal stem cell	stem cell	Homo sampiens
ENCFF244QKQ	ENCBS725VAK	ENCSR786GJM	H3K4me2-human	EFO:0000586	Mesenchymal stem cell	in vitro differentiated cells	Homo sampiens
ENCFF581BTS	ENCBS012DXH	ENCSR786GJM	H3K4me2-human	EFO:0000586	Mesenchymal stem cell	in vitro differentiated cells	Homo sampiens
ENCFF000BFP	ENCBS295NFS	ENCSR000AMC	H3K4me2-human	EFO:0001187	HepG2	immortalized cell line	Homo sampiens
ENCFF000BFQ	ENCBS743JKX	ENCSR000AMC	H3K4me2-human	EFO:0001187	HepG2	immortalized cell line	Homo sampiens
ENCFF410DZX	ENCBS743JKX	ENCSR000AMC	H3K4me2-human	EFO:0001187	HepG2	immortalized cell line	Homo sampiens
ENCFF512NTM	ENCBS295NFS	ENCSR000AMC	H3K4me2-human	EFO:0001187	HepG2	immortalized cell line	Homo sampiens
ENCFF431FYY	ENCBS532LWE	ENCSR730POX	H3K4me2-human	EFO:0003045	H9	stem cell	Homo sampiens
ENCFF905XXA	ENCBS808UWK	ENCSR730POX	H3K4me2-human	EFO:0003045	H9	stem cell	Homo sampiens
ENCFF385FLC	ENCBS945MCY	ENCSR322MEI	H3K4me2-human	EFO:0003042	H1-hESC	stem cell	Homo sampiens
ENCFF921FHX	ENCBS368BPP	ENCSR322MEI	H3K4me2-human	EFO:0003042	H1-hESC	stem cell	Homo sampiens
ENCFF067ZVJ	ENCBS662OGM	ENCSR052WRV	H3K4me3-human	EFO:0002167	DOHH2	immortalized cell line	Homo sampiens
ENCFF562IAL	ENCBS100ZVH	ENCSR052WRV	H3K4me3-human	EFO:0002167	DOHH2	immortalized cell line	Homo sampiens
ENCFF973DCN	ENCBS549SAW	ENCSR941YPY	H3K4me3-human	EFO:0007099	iPS-11a	induced pluripotent stem cell line	Homo sampiens
ENCFF771MGJ	ENCBS757ZRB	ENCSR263ELQ	H3K4me3-human	EFO:0007098	iPS DF 6.9	induced pluripotent stem cell line	Homo sampiens
ENCFF904ZKS	ENCBS586ZNR	ENCSR263ELQ	H3K4me3-human	EFO:0007098	iPS DF 6.9	induced pluripotent stem cell line	Homo sampiens
ENCFF661JGG	ENCBS703ZDS	ENCSR716ZJH	H3K4me3-human	EFO:0003045	H9	stem cell	Homo sampiens
ENCFF917DMP	ENCBS769EPD	ENCSR716ZJH	H3K4me3-human	EFO:0003045	H9	stem cell	Homo sampiens
ENCFF001FNZ	ENCBS721SRV	ENCSR000DUQ	H3K4me3-human	CL:0002327	Mammary epithelial cell	primary cell	Homo sampiens
ENCFF001FOB	ENCBS531UOE	ENCSR000DUQ	H3K4me3-human	CL:0002327	Mammary epithelial cell	primary cell	Homo sampiens
ENCFF001GBD	ENCBS945URM	ENCSR000DXB	H3K4me3-human	EFO:0002713	Panc1	immortalized cell line	Homo sampiens
ENCFF001GBK	ENCBS492WPY	ENCSR000DXB	H3K4me3-human	EFO:0002713	Panc1	immortalized cell line	Homo sampiens
ENCFF001EMA	ENCBS338DRP	ENCSR000DPI	H3K4me3-human	CL:2000014	Fibroblast of upper leg skin	primary cell	Homo sampiens
ENCFF001EMI	ENCBS747YUA	ENCSR000DPI	H3K4me3-human	CL:2000014	Fibroblast of upper leg skin	primary cell	Homo sampiens
ENCFF001FFX	ENCBS304AAA	ENCSR000DTC	H3K4me3-human	CL:2000044	Brain microvascular endothelial cell	primary cell	Homo sampiens
ENCFF001FGD	ENCBS729HUF	ENCSR000DTC	H3K4me3-human	CL:2000044	Brain microvascular endothelial cell	primary cell	Homo sampiens
ENCFF286DPW	ENCBS655ARO	ENCSR340WQU	H3K4me3-human	EFO:0002791	HeLa-S3	immortalized cell line	Homo sampiens
ENCFF185UFB	ENCBS075PNA	ENCSR340WQU	H3K4me3-human	EFO:0002791	HeLa-S3	immortalized cell line	Homo sampiens
ENCFF929XIP	ENCBS369AAA	ENCSR849YFO	H3K4me3-human	NTR:0000560	Bipolar spindle neuron	in vitro differentiated cells	Homo sampiens
ENCFF687NIV	ENCBS374AAA	ENCSR849YFO	H3K4me3-human	NTR:0000560	Bipolar spindle neuron	in vitro differentiated cells	Homo sampiens
ENCFF001ENZ	ENCBS112TMK	ENCSR000DPR	H3K4me3-human	CL:2000012	Fibroblast of pedal digit skin	primary cell	Homo sampiens
ENCFF001EOA	ENCBS394ULN	ENCSR000DPR	H3K4me3-human	CL:2000012	Fibroblast of pedal digit skin	primary cell	Homo sampiens
ENCFF398CFR	ENCBS345YKN	ENCSR535NGG	H3K4me3-human	EFO:0006283	KOPT-K1	immortalized cell line	Homo sampiens
ENCFF615VVB	ENCBS869LIS	ENCSR535NGG	H3K4me3-human	EFO:0006283	KOPT-K1	immortalized cell line	Homo sampiens
ENCFF001GDK	ENCBS501OSZ	ENCSR000DXT	H3K4me3-human	CL:0000188	Skeletal muscle cell	primary cell	Homo sampiens
ENCFF001GDP	ENCBS909WFM	ENCSR000DXT	H3K4me3-human	CL:0000188	Skeletal muscle cell	primary cell	Homo sampiens
ENCFF001FGX	ENCBS501ROB	ENCSR000DTH	H3K4me3-human	CL:0002548	Cardiac fibroblast	primary cell	Homo sampiens
ENCFF001FIT	ENCBS191CHS	ENCSR000DTT	H3K4me3-human	CL:0002252	Epithelial cell of esophagus	primary cell	Homo sampiens
ENCFF001FIY	ENCBS044KJV	ENCSR000DTT	H3K4me3-human	CL:0002252	Epithelial cell of esophagus	primary cell	Homo sampiens
ENCFF001FMO	ENCBS411AMC	ENCSR000DUK	H3K4me3-human	NTR:0004646	HFF-Myc	primary cell	Homo sampiens
ENCFF001FMU	ENCBS553ENC	ENCSR000DUK	H3K4me3-human	NTR:0004646	HFF-Myc	primary cell	Homo sampiens
ENCFF001FNB	ENCBS215JQI	ENCSR000DUO	H3K4me3-human	EFO:0002793	HL-60	immortalized cell line	Homo sampiens
ENCFF001FNI	ENCBS308XSW	ENCSR000DUO	H3K4me3-human	EFO:0002793	HL-60	immortalized cell line	Homo sampiens
ENCFF651TTD	ENCBS215JQI	ENCSR000DUO	H3K4me3-human	EFO:0002793	HL-60	immortalized cell line	Homo sampiens
ENCFF396OAB	ENCBS308XSW	ENCSR000DUO	H3K4me3-human	EFO:0002793	HL-60	immortalized cell line	Homo sampiens
ENCFF001FWO	ENCBS204NMW	ENCSR000DWD	H3K4me3-human	EFO:0002067	K562	immortalized cell line	Homo sampiens
ENCFF001FWT	ENCBS511YCF	ENCSR000DWD	H3K4me3-human	EFO:0002067	K562	immortalized cell line	Homo sampiens
ENCFF001FRA	ENCBS420ENC	ENCSR000DVK	H3K4me3-human	CL:0002586	Retinal pigment epithelial cell	primary cell	Homo sampiens
ENCFF001FRI	ENCBS893GDP	ENCSR000DVK	H3K4me3-human	CL:0002586	Retinal pigment epithelial cell	primary cell	Homo sampiens
ENCFF001ESO	ENCBS700RKG	ENCSR000DQM	H3K4me3-human	EFO:0001099	Caco-2	immortalized cell line	Homo sampiens
ENCFF001EST	ENCBS530YXL	ENCSR000DQM	H3K4me3-human	EFO:0001099	Caco-2	immortalized cell line	Homo sampiens
ENCFF954JJF	ENCBS827JIC	ENCSR778VGY	H3K4me3-human	EFO:0007070	ACC112	immortalized cell line	Homo sampiens
ENCFF346WYN	ENCBS726UUU	ENCSR778VGY	H3K4me3-human	EFO:0007070	ACC112	immortalized cell line	Homo sampiens
ENCFF133DTX	ENCBS433LAO	ENCSR416AUW	H3K4me3-human	UBERON:0008367	Breast epithelium	tissue	Homo sampiens
ENCFF647UET	ENCBS433LAO	ENCSR416AUW	H3K4me3-human	UBERON:0008367	Breast epithelium	tissue	Homo sampiens
ENCFF000VHW	ENCBS810EWQ	ENCSR000EXD	H3K4me3-human	EFO:0005236	NTERA-2	immortalized cell line	Homo sampiens
ENCFF000VHY	ENCBS810EWQ	ENCSR000EXD	H3K4me3-human	EFO:0005236	NTERA-2	immortalized cell line	Homo sampiens
ENCFF261CEH	ENCBS810EWQ	ENCSR000EXD	H3K4me3-human	EFO:0005236	NTERA-2	immortalized cell line	Homo sampiens
ENCFF255ZFJ	ENCBS810EWQ	ENCSR000EXD	H3K4me3-human	EFO:0005236	NTERA-2	immortalized cell line	Homo sampiens
ENCFF001GFQ	ENCBS087YAE	ENCSR000DXU	H3K4me3-human	EFO:0005715	WERI-Rb-1	immortalized cell line	Homo sampiens
ENCFF001GFT	ENCBS679NMZ	ENCSR000DXU	H3K4me3-human	EFO:0005715	WERI-Rb-1	immortalized cell line	Homo sampiens
ENCFF195NMV	ENCBS679NMZ	ENCSR000DXU	H3K4me3-human	EFO:0005715	WERI-Rb-1	immortalized cell line	Homo sampiens
ENCFF289SMU	ENCBS087YAE	ENCSR000DXU	H3K4me3-human	EFO:0005715	WERI-Rb-1	immortalized cell line	Homo sampiens
ENCFF813MFQ	ENCBS861XCF	ENCSR901SIL	H3K4me3-human	UBERON:0002084	Heart left ventricle	tissue	Homo sampiens
ENCFF001FJF	ENCBS022BLS	ENCSR000DTU	H3K4me3-human	EFO:0001182	HEK293	immortalized cell line	Homo sampiens
ENCFF001FJK	ENCBS613RZL	ENCSR000DTU	H3K4me3-human	EFO:0001182	HEK293	immortalized cell line	Homo sampiens
ENCFF375WTP	ENCBS830CIQ	ENCSR057BWO	H3K4me3-human	EFO:0002784	GM12878	immortalized cell line	Homo sampiens
ENCFF056GPS	ENCBS978YID	ENCSR057BWO	H3K4me3-human	EFO:0002784	GM12878	immortalized cell line	Homo sampiens
ENCFF716EYB	ENCBS177ANS	ENCSR441JWF	H3K4me3-human	EFO:0002847	PC-9	immortalized cell line	Homo sampiens
ENCFF996OJN	ENCBS987JQH	ENCSR441JWF	H3K4me3-human	EFO:0002847	PC-9	immortalized cell line	Homo sampiens
ENCFF001FKN	ENCBS493MKF	ENCSR000DUA	H3K4me3-human	EFO:0002791	HeLa-S3	immortalized cell line	Homo sampiens
ENCFF001FKS	ENCBS031GUL	ENCSR000DUA	H3K4me3-human	EFO:0002791	HeLa-S3	immortalized cell line	Homo sampiens
ENCFF001EWI	ENCBS133HLD	ENCSR000DRG	H3K4me3-human	EFO:0005339	GM12866	immortalized cell line	Homo sampiens
ENCFF001ENR	ENCBS485QDY	ENCSR000DPO	H3K4me3-human	CL:0002553	Fibroblast of lung	primary cell	Homo sampiens
ENCFF001ENV	ENCBS004ENC	ENCSR000DPO	H3K4me3-human	CL:0002553	Fibroblast of lung	primary cell	Homo sampiens
ENCFF001FHT	ENCBS559KYO	ENCSR000DTN	H3K4me3-human	CL:0000706	Choroid plexus epithelial cell	primary cell	Homo sampiens
ENCFF001FHW	ENCBS395ENC	ENCSR000DTN	H3K4me3-human	CL:0000706	Choroid plexus epithelial cell	primary cell	Homo sampiens
ENCFF218JTE	ENCBS203SNR	ENCSR153SGD	H3K4me3-human	EFO:0007083	HUES48	stem cell	Homo sampiens
ENCFF587UTZ	ENCBS099BXQ	ENCSR153SGD	H3K4me3-human	EFO:0007083	HUES48	stem cell	Homo sampiens
ENCFF001GBP	ENCBS166KRI	ENCSR000DXF	H3K4me3-human	CL:0002306	Epithelial cell of proximal tubule	primary cell	Homo sampiens
ENCFF001GBU	ENCBS402ENC	ENCSR000DXF	H3K4me3-human	CL:0002306	Epithelial cell of proximal tubule	primary cell	Homo sampiens
ENCFF467CHP	ENCBS555KUV	ENCSR900UIP	H3K4me3-human	UBERON:0001159	Sigmoid colon	tissue	Homo sampiens
ENCFF955GED	ENCBS708EFA	ENCSR657RRI	H3K4me3-human	EFO:0007112	Loucy	immortalized cell line	Homo sampiens
ENCFF912DEA	ENCBS080PZG	ENCSR657RRI	H3K4me3-human	EFO:0007112	Loucy	immortalized cell line	Homo sampiens
ENCFF584PKD	ENCBS772AEX	ENCSR433PUR	H3K4me3-human	CL:0000681	Radial glial cell	in vitro differentiated cells	Homo sampiens
ENCFF812RYE	ENCBS008AOU	ENCSR433PUR	H3K4me3-human	CL:0000681	Radial glial cell	in vitro differentiated cells	Homo sampiens
ENCFF020VFT	ENCBS586UUR	ENCSR761WVQ	H3K4me3-human	UBERON:0002046	Thyroid gland	tissue	Homo sampiens
ENCFF125FKI	ENCBS301UOD	ENCSR910XKX	H3K4me3-human	EFO:0005719	Karpas-422	immortalized cell line	Homo sampiens
ENCFF142XWN	ENCBS850UIV	ENCSR910XKX	H3K4me3-human	EFO:0005719	Karpas-422	immortalized cell line	Homo sampiens
ENCFF572OAS	ENCBS980HYW	ENCSR668LDD	H3K4me3-human	EFO:0002067	K562	immortalized cell line	Homo sampiens
ENCFF407UPO	ENCBS619VEE	ENCSR668LDD	H3K4me3-human	EFO:0002067	K562	immortalized cell line	Homo sampiens
ENCFF963OOU	ENCBS232HQQ	ENCSR620TXL	H3K4me3-human	UBERON:0002369	Adrenal gland	tissue	Homo sampiens
ENCFF001EXQ	ENCBS813RJD	ENCSR000DRY	H3K4me3-human	EFO:0002784	GM12878	immortalized cell line	Homo sampiens
ENCFF001EXR	ENCBS657FSS	ENCSR000DRY	H3K4me3-human	EFO:0002784	GM12878	immortalized cell line	Homo sampiens
ENCFF001GAC	ENCBS281QFI	ENCSR000DWV	H3K4me3-human	CL:0000312	Keratinocyte	primary cell	Homo sampiens
ENCFF001GAD	ENCBS501AXW	ENCSR000DWV	H3K4me3-human	CL:0000312	Keratinocyte	primary cell	Homo sampiens
ENCFF814APR	ENCBS281QFI	ENCSR000DWV	H3K4me3-human	CL:0000312	Keratinocyte	primary cell	Homo sampiens
ENCFF104YCW	ENCBS501AXW	ENCSR000DWV	H3K4me3-human	CL:0000312	Keratinocyte	primary cell	Homo sampiens
ENCFF000CHW	ENCBS020ENC	ENCSR000AOU	H3K4me3-human	CL:0000127	Astrocyte	primary cell	Homo sampiens
ENCFF000CHX	ENCBS096LWS	ENCSR000AOU	H3K4me3-human	CL:0000127	Astrocyte	primary cell	Homo sampiens
ENCFF001FSZ	ENCBS332AAA	ENCSR000DVS	H3K4me3-human	CL:0002558	Fibroblast of villous mesenchyme	primary cell	Homo sampiens
ENCFF001FTC	ENCBS825YFA	ENCSR000DVS	H3K4me3-human	CL:0002558	Fibroblast of villous mesenchyme	primary cell	Homo sampiens
ENCFF001GDX	ENCBS400ENC	ENCSR000DXL	H3K4me3-human	EFO:0002860	SK-N-MC	immortalized cell line	Homo sampiens
ENCFF001GDY	ENCBS366AET	ENCSR000DXL	H3K4me3-human	EFO:0002860	SK-N-MC	immortalized cell line	Homo sampiens
ENCFF001FEW	ENCBS115FPY	ENCSR000DSY	H3K4me3-human	CL:0002603	Astrocyte of the cerebellum	primary cell	Homo sampiens
ENCFF001FEX	ENCBS303AAA	ENCSR000DSY	H3K4me3-human	CL:0002603	Astrocyte of the cerebellum	primary cell	Homo sampiens
ENCFF001FYO	ENCBS390ENC	ENCSR000DWP	H3K4me3-human	EFO:0002798	NB4	immortalized cell line	Homo sampiens
ENCFF001ERH	ENCBS693PNC	ENCSR000DQH	H3K4me3-human	CL:1001608	Foreskin fibroblast	primary cell	Homo sampiens
ENCFF001ERL	ENCBS488ZLU	ENCSR000DQH	H3K4me3-human	CL:1001608	Foreskin fibroblast	primary cell	Homo sampiens
ENCFF001FSI	ENCBS723CDM	ENCSR000DVN	H3K4me3-human	CL:0002618	Endothelial cell of umbilical vein	primary cell	Homo sampiens
ENCFF001FSJ	ENCBS834QWR	ENCSR000DVN	H3K4me3-human	CL:0002618	Endothelial cell of umbilical vein	primary cell	Homo sampiens
ENCFF709DML	ENCBS018DDZ	ENCSR975GZA	H3K4me3-human	EFO:0003072	SK-N-SH	immortalized cell line	Homo sampiens
ENCFF107OBT	ENCBS500EWH	ENCSR975GZA	H3K4me3-human	EFO:0003072	SK-N-SH	immortalized cell line	Homo sampiens
ENCFF315DGS	ENCBS847SOB	ENCSR333OPW	H3K4me3-human	EFO:0002824	HCT116	immortalized cell line	Homo sampiens
ENCFF800JTG	ENCBS494OPB	ENCSR333OPW	H3K4me3-human	EFO:0002824	HCT116	immortalized cell line	Homo sampiens
ENCFF001EVG	ENCBS388ZNW	ENCSR000DQZ	H3K4me3-human	EFO:0005337	GM12864	immortalized cell line	Homo sampiens
ENCFF001EVM	ENCBS845FQR	ENCSR000DQZ	H3K4me3-human	EFO:0005337	GM12864	immortalized cell line	Homo sampiens
ENCFF602CAO	ENCBS388ZNW	ENCSR000DQZ	H3K4me3-human	EFO:0005337	GM12864	immortalized cell line	Homo sampiens
ENCFF893OET	ENCBS845FQR	ENCSR000DQZ	H3K4me3-human	EFO:0005337	GM12864	immortalized cell line	Homo sampiens
ENCFF001FXA	ENCBS418ENC	ENCSR000DWF	H3K4me3-human	EFO:0005726	LNCaP clone FGC	immortalized cell line	Homo sampiens
ENCFF001FXD	ENCBS235TSM	ENCSR000DWF	H3K4me3-human	EFO:0005726	LNCaP clone FGC	immortalized cell line	Homo sampiens
ENCFF170CQY	ENCBS054JUC	ENCSR508UPW	H3K4me3-human	UBERON:0006920	Esophagus squamous epithelium	tissue	Homo sampiens
ENCFF518TFW	ENCBS054JUC	ENCSR508UPW	H3K4me3-human	UBERON:0006920	Esophagus squamous epithelium	tissue	Homo sampiens
ENCFF974KVN	ENCBS543OJU	ENCSR984KWT	H3K4me3-human	UBERON:0001515	Thoracic aorta	tissue	Homo sampiens
ENCFF670ZGD	ENCBS642ZQR	ENCSR489ZLL	H3K4me3-human	UBERON:0000945	Stomach	tissue	Homo sampiens
ENCFF001FGK	ENCBS993VPT	ENCSR000DTE	H3K4me3-human	CL:0002548	Cardiac fibroblast	primary cell	Homo sampiens
ENCFF001FGL	ENCBS392ENC	ENCSR000DTE	H3K4me3-human	CL:0002548	Cardiac fibroblast	primary cell	Homo sampiens
ENCFF332UYK	ENCBS765HGS	ENCSR933BVL	H3K4me3-human	UBERON:0001157	Transverse colon	tissue	Homo sampiens
ENCFF724MTQ	ENCBS474IPU	ENCSR343ZOV	H3K4me3-human	UBERON:0001621	Coronary artery	tissue	Homo sampiens
ENCFF925AJJ	ENCBS474IPU	ENCSR343ZOV	H3K4me3-human	UBERON:0001621	Coronary artery	tissue	Homo sampiens
ENCFF001FHF	ENCBS836NVG	ENCSR000DTK	H3K4me3-human	CL:0000746	Cardiac muscle cell	primary cell	Homo sampiens
ENCFF001FHK	ENCBS072ENC	ENCSR000DTK	H3K4me3-human	CL:0000746	Cardiac muscle cell	primary cell	Homo sampiens
ENCFF415TQT	ENCBS071FUE	ENCSR607ARN	H3K4me3-human	UBERON:0004648	Esophagus muscularis mucosa	tissue	Homo sampiens
ENCFF994HCO	ENCBS071FUE	ENCSR607ARN	H3K4me3-human	UBERON:0004648	Esophagus muscularis mucosa	tissue	Homo sampiens
ENCFF001EQF	ENCBS271SFD	ENCSR000DQB	H3K4me3-human	EFO:0005725	BE2C	immortalized cell line	Homo sampiens
ENCFF001EQG	ENCBS982TUR	ENCSR000DQB	H3K4me3-human	EFO:0005725	BE2C	immortalized cell line	Homo sampiens
ENCFF595RYY	ENCBS688JZQ	ENCSR564VIX	H3K4me3-human	EFO:0007074	DND-41	immortalized cell line	Homo sampiens
ENCFF668EFC	ENCBS439IWV	ENCSR564VIX	H3K4me3-human	EFO:0007074	DND-41	immortalized cell line	Homo sampiens
ENCFF001EVR	ENCBS710IXP	ENCSR000DRC	H3K4me3-human	EFO:0005338	GM12865	immortalized cell line	Homo sampiens
ENCFF001EVW	ENCBS885AEZ	ENCSR000DRC	H3K4me3-human	EFO:0005338	GM12865	immortalized cell line	Homo sampiens
ENCFF447JKC	ENCBS710IXP	ENCSR000DRC	H3K4me3-human	EFO:0005338	GM12865	immortalized cell line	Homo sampiens
ENCFF575COH	ENCBS885AEZ	ENCSR000DRC	H3K4me3-human	EFO:0005338	GM12865	immortalized cell line	Homo sampiens
ENCFF418HCK	ENCBS078MQQ	ENCSR926NMC	H3K4me3-human	UBERON:0002369	Adrenal gland	tissue	Homo sampiens
ENCFF001FPH	ENCBS323AAA	ENCSR000DVC	H3K4me3-human	CL:0002553	Fibroblast of lung	primary cell	Homo sampiens
ENCFF001FPK	ENCBS024DYT	ENCSR000DVC	H3K4me3-human	CL:0002553	Fibroblast of lung	primary cell	Homo sampiens
ENCFF290WZR	ENCBS914GNL	ENCSR596NOF	H3K4me3-human	CL:0000515	Skeletal muscle myoblast	primary cell	Homo sampiens
ENCFF280HQO	ENCBS034BMX	ENCSR596NOF	H3K4me3-human	CL:0000515	Skeletal muscle myoblast	primary cell	Homo sampiens
ENCFF385ZJY	ENCBS571AQH	ENCSR082NQB	H3K4me3-human	EFO:0001221	Myeloma	immortalized cell line	Homo sampiens
ENCFF696BFR	ENCBS197CBA	ENCSR082NQB	H3K4me3-human	EFO:0001221	Myeloma	immortalized cell line	Homo sampiens
ENCFF001EPM	ENCBS403VCX	ENCSR000DQA	H3K4me3-human	CL:0002547	Fibroblast of the aortic adventitia	primary cell	Homo sampiens
ENCFF001EPR	ENCBS098SOQ	ENCSR000DQA	H3K4me3-human	CL:0002547	Fibroblast of the aortic adventitia	primary cell	Homo sampiens
ENCFF001EWT	ENCBS823YEP	ENCSR000DRS	H3K4me3-human	EFO:0001162	GM12875	immortalized cell line	Homo sampiens
ENCFF693JCT	ENCBS823YEP	ENCSR000DRS	H3K4me3-human	EFO:0001162	GM12875	immortalized cell line	Homo sampiens
ENCFF101EGM	ENCBS328HPC	ENCSR122LOZ	H3K4me3-human	UBERON:0001496	Ascending aorta	tissue	Homo sampiens
ENCFF320ABP	ENCBS861DVK	ENCSR206STN	H3K4me3-human	UBERON:0011907	Gastrocnemius medialis	tissue	Homo sampiens
ENCFF682GSA	ENCBS861DVK	ENCSR206STN	H3K4me3-human	UBERON:0011907	Gastrocnemius medialis	tissue	Homo sampiens
ENCFF506SJL	ENCBS372AAA	ENCSR479HKJ	H3K4me3-human	CL:2000015	Fibroblast of arm	primary cell	Homo sampiens
ENCFF863KGF	ENCBS367AAA	ENCSR479HKJ	H3K4me3-human	CL:2000015	Fibroblast of arm	primary cell	Homo sampiens
ENCFF179TEP	ENCBS372AAA	ENCSR479HKJ	H3K4me3-human	CL:2000015	Fibroblast of arm	primary cell	Homo sampiens
ENCFF397XVM	ENCBS367AAA	ENCSR479HKJ	H3K4me3-human	CL:2000015	Fibroblast of arm	primary cell	Homo sampiens
ENCFF001GGO	ENCBS157XHV	ENCSR000DXZ	H3K4me3-human	EFO:0001260	WI38	immortalized cell line	Homo sampiens
ENCFF001GGT	ENCBS606ENC	ENCSR000DXZ	H3K4me3-human	EFO:0001260	WI38	immortalized cell line	Homo sampiens
ENCFF000VJA	ENCBS729QZR	ENCSR000EXI	H3K4me3-human	EFO:0002713	Panc1	immortalized cell line	Homo sampiens
ENCFF000VJB	ENCBS729QZR	ENCSR000EXI	H3K4me3-human	EFO:0002713	Panc1	immortalized cell line	Homo sampiens
ENCFF001FYA	ENCBS609ENC	ENCSR000DWL	H3K4me3-human	CL:0001054	Monocytes-CD14+	primary cell	Homo sampiens
ENCFF001EYO	ENCBS093MVN	ENCSR000DSE	H3K4me3-human	EFO:0000315	Cardiac mesoderm	in vitro differentiated cells	Homo sampiens
ENCFF001EYP	ENCBS824XSS	ENCSR000DSE	H3K4me3-human	EFO:0000315	Cardiac mesoderm	in vitro differentiated cells	Homo sampiens
ENCFF001FQN	ENCBS869FDU	ENCSR000DVG	H3K4me3-human	CL:0002518	Kidney epithelial cell	primary cell	Homo sampiens
ENCFF001FQO	ENCBS050EYT	ENCSR000DVG	H3K4me3-human	CL:0002518	Kidney epithelial cell	primary cell	Homo sampiens
ENCFF791VWP	ENCBS987CHP	ENCSR539TKY	H3K4me3-human	EFO:0005694	KMS-11	immortalized cell line	Homo sampiens
ENCFF058AEQ	ENCBS536THV	ENCSR344TLI	H3K4me3-human	UBERON:0001114	Right lobe of liver	tissue	Homo sampiens
ENCFF566UVE	ENCBS536THV	ENCSR344TLI	H3K4me3-human	UBERON:0001114	Right lobe of liver	tissue	Homo sampiens
ENCFF797JGI	ENCBS047TWL	ENCSR258UUX	H3K4me3-human	UBERON:0000996	Vagina	tissue	Homo sampiens
ENCFF587VBR	ENCBS047TWL	ENCSR258UUX	H3K4me3-human	UBERON:0000996	Vagina	tissue	Homo sampiens
ENCFF001EUQ	ENCBS185XLT	ENCSR000DQV	H3K4me3-human	EFO:0002783	GM06990	immortalized cell line	Homo sampiens
ENCFF001EUV	ENCBS146QHV	ENCSR000DQV	H3K4me3-human	EFO:0002783	GM06990	immortalized cell line	Homo sampiens
ENCFF001EZJ	ENCBS303BHK	ENCSR000DSD	H3K4me3-human	EFO:0000315	Cardiac mesoderm	in vitro differentiated cells	Homo sampiens
ENCFF001EZQ	ENCBS152EVQ	ENCSR000DSD	H3K4me3-human	EFO:0000315	Cardiac mesoderm	in vitro differentiated cells	Homo sampiens
ENCFF729RZP	ENCBS153ORV	ENCSR176ABZ	H3K4me3-human	EFO:0007086	HUES6	stem cell	Homo sampiens
ENCFF020YCC	ENCBS530IZG	ENCSR176ABZ	H3K4me3-human	EFO:0007086	HUES6	stem cell	Homo sampiens
ENCFF014AIG	ENCBS522TJW	ENCSR901BRV	H3K4me3-human	UBERON:0002046	Thyroid gland	tissue	Homo sampiens
ENCFF001EON	ENCBS992UXD	ENCSR000DPU	H3K4me3-human	CL:0002552	Fibroblast of gingiva	primary cell	Homo sampiens
ENCFF001EOT	ENCBS697FJI	ENCSR000DPU	H3K4me3-human	CL:0002552	Fibroblast of gingiva	primary cell	Homo sampiens
ENCFF102IZW	ENCBS448IJH	ENCSR236XRR	H3K4me3-human	EFO:0007102	iPS-15b	induced pluripotent stem cell line	Homo sampiens
ENCFF606UPH	ENCBS945KYE	ENCSR422JNY	H3K4me3-human	EFO:0005907	OCI-LY1	immortalized cell line	Homo sampiens
ENCFF306MII	ENCBS397COL	ENCSR422JNY	H3K4me3-human	EFO:0005907	OCI-LY1	immortalized cell line	Homo sampiens
ENCFF001ETO	ENCBS484ENC	ENCSR000DQR	H3K4me3-human	CL:0000236	B cell	primary cell	Homo sampiens
ENCFF784URR	ENCBS866HOM	ENCSR785DJD	H3K4me3-human	UBERON:0011907	Gastrocnemius medialis	tissue	Homo sampiens
ENCFF001FFL	ENCBS302AAA	ENCSR000DSW	H3K4me3-human	CL:0002606	Astrocyte of the spinal cord	primary cell	Homo sampiens
ENCFF001FFQ	ENCBS995OME	ENCSR000DSW	H3K4me3-human	CL:0002606	Astrocyte of the spinal cord	primary cell	Homo sampiens
ENCFF000VJO	ENCBS343AAA	ENCSR000EXT	H3K4me3-human	CL:0000842	Mononuclear cell	primary cell	Homo sampiens
ENCFF000VJR	ENCBS343AAA	ENCSR000EXT	H3K4me3-human	CL:0000842	Mononuclear cell	primary cell	Homo sampiens
ENCFF620KNH	ENCBS343AAA	ENCSR000EXT	H3K4me3-human	CL:0000842	Mononuclear cell	primary cell	Homo sampiens
ENCFF593FEO	ENCBS343AAA	ENCSR000EXT	H3K4me3-human	CL:0000842	Mononuclear cell	primary cell	Homo sampiens
ENCFF001FLU	ENCBS645YGY	ENCSR000DUF	H3K4me3-human	EFO:0001187	HepG2	immortalized cell line	Homo sampiens
ENCFF001FLV	ENCBS270KOG	ENCSR000DUF	H3K4me3-human	EFO:0001187	HepG2	immortalized cell line	Homo sampiens
ENCFF001FYV	ENCBS748WVA	ENCSR000DWS	H3K4me3-human	CL:1001608	Foreskin fibroblast	primary cell	Homo sampiens
ENCFF001FZA	ENCBS271PJP	ENCSR000DWS	H3K4me3-human	CL:1001608	Foreskin fibroblast	primary cell	Homo sampiens
ENCFF115HTK	ENCBS294RTL	ENCSR930HLX	H3K4me3-human	UBERON:0001515	Thoracic aorta	tissue	Homo sampiens
ENCFF502AXL	ENCBS703OTV	ENCSR930HLX	H3K4me3-human	UBERON:0001515	Thoracic aorta	tissue	Homo sampiens
ENCFF001EYK	ENCBS395GPZ	ENCSR000DSP	H3K4me3-human	EFO:0000315	Cardiac mesoderm	in vitro differentiated cells	Homo sampiens
ENCFF001EYL	ENCBS173KZV	ENCSR000DSP	H3K4me3-human	EFO:0000315	Cardiac mesoderm	in vitro differentiated cells	Homo sampiens
ENCFF319QIC	ENCBS869MHP	ENCSR876DCP	H3K4me3-human	UBERON:0001150	Body of pancreas	tissue	Homo sampiens
ENCFF340PYU	ENCBS869MHP	ENCSR876DCP	H3K4me3-human	UBERON:0001150	Body of pancreas	tissue	Homo sampiens
ENCFF270PBG	ENCBS783BYN	ENCSR510NXV	H3K4me3-human	UBERON:0004550	Gastroesophageal sphincter	tissue	Homo sampiens
ENCFF417HIV	ENCBS783BYN	ENCSR510NXV	H3K4me3-human	UBERON:0004550	Gastroesophageal sphincter	tissue	Homo sampiens
ENCFF001EOZ	ENCBS065SFO	ENCSR000DPX	H3K4me3-human	CL:2000013	Fibroblast of skin of abdomen	primary cell	Homo sampiens
ENCFF001EPG	ENCBS793PDT	ENCSR000DPX	H3K4me3-human	CL:2000013	Fibroblast of skin of abdomen	primary cell	Homo sampiens
ENCFF575JJC	ENCBS248LIK	ENCSR314SPW	H3K4me3-human	UBERON:0001323	Tibial nerve	tissue	Homo sampiens
ENCFF391HVL	ENCBS913XPU	ENCSR197QDK	H3K4me3-human	UBERON:0002106	Spleen	tissue	Homo sampiens
ENCFF127TGU	ENCBS981ZAE	ENCSR361FWQ	H3K4me3-human	EFO:0005724	MM.1S	immortalized cell line	Homo sampiens
ENCFF380YRC	ENCBS241TLI	ENCSR361FWQ	H3K4me3-human	EFO:0005724	MM.1S	immortalized cell line	Homo sampiens
ENCFF001EYZ	ENCBS360WQQ	ENCSR000DSO	H3K4me3-human	EFO:0000315	Cardiac mesoderm	in vitro differentiated cells	Homo sampiens
ENCFF001EZC	ENCBS138XIW	ENCSR000DSO	H3K4me3-human	EFO:0000315	Cardiac mesoderm	in vitro differentiated cells	Homo sampiens
ENCFF201LGO	ENCBS138XIW	ENCSR000DSO	H3K4me3-human	EFO:0000315	Cardiac mesoderm	in vitro differentiated cells	Homo sampiens
ENCFF928TJF	ENCBS360WQQ	ENCSR000DSO	H3K4me3-human	EFO:0000315	Cardiac mesoderm	in vitro differentiated cells	Homo sampiens
ENCFF001FDZ	ENCBS017AOD	ENCSR000DSR	H3K4me3-human	EFO:0005904	H7-hESC	stem cell	Homo sampiens
ENCFF001FEA	ENCBS851RDN	ENCSR000DSR	H3K4me3-human	EFO:0005904	H7-hESC	stem cell	Homo sampiens
ENCFF281ROX	ENCBS851RDN	ENCSR000DSR	H3K4me3-human	EFO:0005904	H7-hESC	stem cell	Homo sampiens
ENCFF221EJW	ENCBS017AOD	ENCSR000DSR	H3K4me3-human	EFO:0005904	H7-hESC	stem cell	Homo sampiens
ENCFF001GCX	ENCBS184XYA	ENCSR000DXJ	H3K4me3-human	CL:0002328	Bronchial epithelial cell	primary cell	Homo sampiens
ENCFF001GCY	ENCBS367KZY	ENCSR000DXJ	H3K4me3-human	CL:0002328	Bronchial epithelial cell	primary cell	Homo sampiens
ENCFF000BMB	ENCBS914GNL	ENCSR000ANK	H3K4me3-human	CL:0000515	Skeletal muscle myoblast	primary cell	Homo sampiens
ENCFF000BMD	ENCBS023XCT	ENCSR000ANK	H3K4me3-human	CL:0000515	Skeletal muscle myoblast	primary cell	Homo sampiens
ENCFF001FML	ENCBS921TFG	ENCSR000DUJ	H3K4me3-human	CL:1001608	Foreskin fibroblast	primary cell	Homo sampiens
ENCFF001GFD	ENCBS767VYD	ENCSR000DXR	H3K4me3-human	EFO:0003072	SK-N-SH	immortalized cell line	Homo sampiens
ENCFF001GFM	ENCBS718MJZ	ENCSR000DXR	H3K4me3-human	EFO:0003072	SK-N-SH	immortalized cell line	Homo sampiens
ENCFF000BXW	ENCBS639AAA	ENCSR000AKU	H3K4me3-human	EFO:0002067	K562	immortalized cell line	Homo sampiens
ENCFF000BXZ	ENCBS674MPN	ENCSR000AKU	H3K4me3-human	EFO:0002067	K562	immortalized cell line	Homo sampiens
ENCFF804NBY	ENCBS674MPN	ENCSR000AKU	H3K4me3-human	EFO:0002067	K562	immortalized cell line	Homo sampiens
ENCFF681JQI	ENCBS639AAA	ENCSR000AKU	H3K4me3-human	EFO:0002067	K562	immortalized cell line	Homo sampiens
ENCFF001FXP	ENCBS661RDG	ENCSR000DWJ	H3K4me3-human	EFO:0001203	MCF-7	immortalized cell line	Homo sampiens
ENCFF001FXX	ENCBS748WRO	ENCSR000DWJ	H3K4me3-human	EFO:0001203	MCF-7	immortalized cell line	Homo sampiens
ENCFF195GST	ENCBS253TYD	ENCSR814XPE	H3K4me3-human	EFO:0003042	H1-hESC	stem cell	Homo sampiens
ENCFF539XVD	ENCBS011NFB	ENCSR814XPE	H3K4me3-human	EFO:0003042	H1-hESC	stem cell	Homo sampiens
ENCFF448XZR	ENCBS952IPA	ENCSR814XPE	H3K4me3-human	EFO:0003042	H1-hESC	stem cell	Homo sampiens
ENCFF458ZKV	ENCBS091ENC	ENCSR016JWS	H3K4me3-human	CL:0002327	Mammary epithelial cell	primary cell	Homo sampiens
ENCFF373TJR	ENCBS045GHW	ENCSR016JWS	H3K4me3-human	CL:0002327	Mammary epithelial cell	primary cell	Homo sampiens
ENCFF779NPB	ENCBS780PCJ	ENCSR515PKY	H3K4me3-human	CL:0000192	Smooth muscle cell	in vitro differentiated cells	Homo sampiens
ENCFF971VRD	ENCBS899TTJ	ENCSR515PKY	H3K4me3-human	CL:0000192	Smooth muscle cell	in vitro differentiated cells	Homo sampiens
ENCFF899ARW	ENCBS596CTT	ENCSR275NCH	H3K4me3-human	EFO:0002074	PC-3	immortalized cell line	Homo sampiens
ENCFF422CEI	ENCBS451OVM	ENCSR275NCH	H3K4me3-human	EFO:0002074	PC-3	immortalized cell line	Homo sampiens
ENCFF000AJD	ENCBS160AAA	ENCSR000AST	H3K4me3-human	EFO:0001086	A549	immortalized cell line	Homo sampiens
ENCFF000AJF	ENCBS160AAA	ENCSR000AST	H3K4me3-human	EFO:0001086	A549	immortalized cell line	Homo sampiens
ENCFF444BLS	ENCBS044KWE	ENCSR661MUS	H3K4me3-human	NTR:0000711	Neural progenitor cell	in vitro differentiated cells	Homo sampiens
ENCFF496ZEP	ENCBS018TPT	ENCSR661MUS	H3K4me3-human	NTR:0000711	Neural progenitor cell	in vitro differentiated cells	Homo sampiens
ENCFF000AJK	ENCBS161AAA	ENCSR000ASH	H3K4me3-human	EFO:0001086	A549	immortalized cell line	Homo sampiens
ENCFF000AJL	ENCBS161AAA	ENCSR000ASH	H3K4me3-human	EFO:0001086	A549	immortalized cell line	Homo sampiens
ENCFF079TOP	ENCBS161AAA	ENCSR000ASH	H3K4me3-human	EFO:0001086	A549	immortalized cell line	Homo sampiens
ENCFF761OKC	ENCBS161AAA	ENCSR000ASH	H3K4me3-human	EFO:0001086	A549	immortalized cell line	Homo sampiens
ENCFF498BFK	ENCBS015UPH	ENCSR894OYM	H3K4me3-human	EFO:0007089	HUES64	stem cell	Homo sampiens
ENCFF884JIG	ENCBS389KQW	ENCSR894OYM	H3K4me3-human	EFO:0007089	HUES64	stem cell	Homo sampiens
ENCFF135DAC	ENCBS693QTT	ENCSR972ETR	H3K4me3-human	UBERON:0011907	Gastrocnemius medialis	tissue	Homo sampiens
ENCFF614BWS	ENCBS693QTT	ENCSR972ETR	H3K4me3-human	UBERON:0011907	Gastrocnemius medialis	tissue	Homo sampiens
ENCFF865RQN	ENCBS363SWF	ENCSR662PLB	H3K4me3-human	CL:0002259	Neuroepithelial stem cell	in vitro differentiated cells	Homo sampiens
ENCFF003GVA	ENCBS562NPI	ENCSR662PLB	H3K4me3-human	CL:0002259	Neuroepithelial stem cell	in vitro differentiated cells	Homo sampiens
ENCFF321ISC	ENCBS385OLC	ENCSR435FGK	H3K4me3-human	EFO:0002106	A673	immortalized cell line	Homo sampiens
ENCFF691SFY	ENCBS615MBV	ENCSR435FGK	H3K4me3-human	EFO:0002106	A673	immortalized cell line	Homo sampiens
ENCFF822KGE	ENCBS273LIC	ENCSR287VPM	H3K4me3-human	EFO:0002860	SK-N-MC	immortalized cell line	Homo sampiens
ENCFF446UTW	ENCBS203EZT	ENCSR287VPM	H3K4me3-human	EFO:0002860	SK-N-MC	immortalized cell line	Homo sampiens
ENCFF123YZJ	ENCBS859WPH	ENCSR578QSO	H3K4me3-human	CL:0002618	Endothelial cell of umbilical vein	primary cell	Homo sampiens
ENCFF380AYQ	ENCBS741UNQ	ENCSR578QSO	H3K4me3-human	CL:0002618	Endothelial cell of umbilical vein	primary cell	Homo sampiens
ENCFF482XRP	ENCBS050AKF	ENCSR975NOU	H3K4me3-human	UBERON:0002046	Thyroid gland	tissue	Homo sampiens
ENCFF606GLK	ENCBS050AKF	ENCSR975NOU	H3K4me3-human	UBERON:0002046	Thyroid gland	tissue	Homo sampiens
ENCFF229AIK	ENCBS019YGN	ENCSR419BDT	H3K4me3-human	UBERON:0001987	Placenta	tissue	Homo sampiens
ENCFF000APG	ENCBS688JZQ	ENCSR000ARA	H3K4me3-human	EFO:0007074	DND-41	immortalized cell line	Homo sampiens
ENCFF000APH	ENCBS282AAA	ENCSR000ARA	H3K4me3-human	EFO:0007074	DND-41	immortalized cell line	Homo sampiens
ENCFF350KJB	ENCBS282AAA	ENCSR000ARA	H3K4me3-human	EFO:0007074	DND-41	immortalized cell line	Homo sampiens
ENCFF160WOY	ENCBS688JZQ	ENCSR000ARA	H3K4me3-human	EFO:0007074	DND-41	immortalized cell line	Homo sampiens
ENCFF161NHB	ENCBS209WBW	ENCSR554RQQ	H3K4me3-human	UBERON:0001150	Body of pancreas	tissue	Homo sampiens
ENCFF071BWC	ENCBS209WBW	ENCSR554RQQ	H3K4me3-human	UBERON:0001150	Body of pancreas	tissue	Homo sampiens
ENCFF434GEP	ENCBS520VFV	ENCSR442ZOI	H3K4me3-human	CL:0000182	Hepatocyte	in vitro differentiated cells	Homo sampiens
ENCFF921PYT	ENCBS077RUJ	ENCSR442ZOI	H3K4me3-human	CL:0000182	Hepatocyte	in vitro differentiated cells	Homo sampiens
ENCFF001GAQ	ENCBS936GPP	ENCSR000DWZ	H3K4me3-human	CL:0002553	Fibroblast of lung	primary cell	Homo sampiens
ENCFF001GAW	ENCBS340AAA	ENCSR000DWZ	H3K4me3-human	CL:0002553	Fibroblast of lung	primary cell	Homo sampiens
ENCFF887NQL	ENCBS355KGI	ENCSR922CAT	H3K4me3-human	NTR:0003830	Mid-neurogenesis radial glial cells	in vitro differentiated cells	Homo sampiens
ENCFF661WTZ	ENCBS741FXQ	ENCSR922CAT	H3K4me3-human	NTR:0003830	Mid-neurogenesis radial glial cells	in vitro differentiated cells	Homo sampiens
ENCFF290CZW	ENCBS339AAA	ENCSR915QOL	H3K4me3-human	CL:0002553	Fibroblast of lung	primary cell	Homo sampiens
ENCFF148IFM	ENCBS149EDI	ENCSR915QOL	H3K4me3-human	CL:0002553	Fibroblast of lung	primary cell	Homo sampiens
ENCFF001FOT	ENCBS321AAA	ENCSR000DUZ	H3K4me3-human	CL:0002557	Fibroblast of pulmonary artery	primary cell	Homo sampiens
ENCFF001FOU	ENCBS769DLJ	ENCSR000DUZ	H3K4me3-human	CL:0002557	Fibroblast of pulmonary artery	primary cell	Homo sampiens
ENCFF001FIF	ENCBS409ENC	ENCSR000DTQ	H3K4me3-human	EFO:0002824	HCT116	immortalized cell line	Homo sampiens
ENCFF001FIL	ENCBS650OZU	ENCSR000DTQ	H3K4me3-human	EFO:0002824	HCT116	immortalized cell line	Homo sampiens
ENCFF425FFD	ENCBS766ILR	ENCSR878KIY	H3K4me3-human	UBERON:0001211	Peyer's patch	tissue	Homo sampiens
ENCFF621JTK	ENCBS766ILR	ENCSR878KIY	H3K4me3-human	UBERON:0001211	Peyer's patch	tissue	Homo sampiens
ENCFF301JSI	ENCBS107PVI	ENCSR494LJG	H3K4me3-human	EFO:0002357	SUDHL6	immortalized cell line	Homo sampiens
ENCFF071WMV	ENCBS136LHJ	ENCSR494LJG	H3K4me3-human	EFO:0002357	SUDHL6	immortalized cell line	Homo sampiens
ENCFF001FTH	ENCBS407ENC	ENCSR000DVU	H3K4me3-human	NTR:0003860	Jurkat clone E61	immortalized cell line	Homo sampiens
ENCFF001FTO	ENCBS550BVM	ENCSR000DVU	H3K4me3-human	NTR:0003860	Jurkat clone E61	immortalized cell line	Homo sampiens
ENCFF960GYF	ENCBS684YJH	ENCSR208WDY	H3K4me3-human	UBERON:0008952	Upper lobe of left lung	tissue	Homo sampiens
ENCFF945SBT	ENCBS493WOF	ENCSR791KFQ	H3K4me3-human	UBERON:0006631	Right atrium auricular region	tissue	Homo sampiens
ENCFF001FOM	ENCBS311AAA	ENCSR000DUW	H3K4me3-human	CL:0002555	Fibroblast of mammary gland	primary cell	Homo sampiens
ENCFF001FOO	ENCBS399FWJ	ENCSR000DUW	H3K4me3-human	CL:0002555	Fibroblast of mammary gland	primary cell	Homo sampiens
ENCFF894KLD	ENCBS757GPD	ENCSR548PZS	H3K4me3-human	EFO:0006710	OCI-LY3	immortalized cell line	Homo sampiens
ENCFF400WZA	ENCBS018GXW	ENCSR548PZS	H3K4me3-human	EFO:0006710	OCI-LY3	immortalized cell line	Homo sampiens
ENCFF787UJE	ENCBS935RSN	ENCSR970FPM	H3K4me3-human	CL:0000312	Keratinocyte	primary cell	Homo sampiens
ENCFF399YAM	ENCBS574ILP	ENCSR970FPM	H3K4me3-human	CL:0000312	Keratinocyte	primary cell	Homo sampiens
ENCFF001GGD	ENCBS715PYA	ENCSR000DXY	H3K4me3-human	EFO:0001260	WI38	immortalized cell line	Homo sampiens
ENCFF001GGE	ENCBS601ENJ	ENCSR000DXY	H3K4me3-human	EFO:0001260	WI38	immortalized cell line	Homo sampiens
ENCFF209RUO	ENCBS478AAA	ENCSR000FCL	H3K4me3-human	EFO:0005333	GM08714	immortalized cell line	Homo sampiens
ENCFF208HUN	ENCBS477AAA	ENCSR000FCL	H3K4me3-human	EFO:0005333	GM08714	immortalized cell line	Homo sampiens
ENCFF000BPL	ENCBS276EMT	ENCSR000ANZ	H3K4me3-human	CL:0002372	Myotube	in vitro differentiated cells	Homo sampiens
ENCFF000BPM	ENCBS639UHS	ENCSR000ANZ	H3K4me3-human	CL:0002372	Myotube	in vitro differentiated cells	Homo sampiens
ENCFF868UDM	ENCBS098ETX	ENCSR878JSF	H3K4me3-human	CL:0000236	B cell	primary cell	Homo sampiens
ENCFF990GRQ	ENCBS006VZG	ENCSR005SXO	H3K4me3-human	EFO:0006711	OCI-LY7	immortalized cell line	Homo sampiens
ENCFF652QLZ	ENCBS886BJZ	ENCSR005SXO	H3K4me3-human	EFO:0006711	OCI-LY7	immortalized cell line	Homo sampiens
ENCFF997ZRV	ENCBS343AKO	ENCSR652QNW	H3K4me3-human	CL:0000746	Cardiac muscle cell	in vitro differentiated cells	Homo sampiens
ENCFF683OKL	ENCBS806KLM	ENCSR652QNW	H3K4me3-human	CL:0000746	Cardiac muscle cell	in vitro differentiated cells	Homo sampiens
ENCFF946PRH	ENCBS694TAW	ENCSR432GOP	H3K4me3-human	UBERON:0004264	Lower leg skin	tissue	Homo sampiens
ENCFF963ZVR	ENCBS851XJZ	ENCSR432GOP	H3K4me3-human	UBERON:0004264	Lower leg skin	tissue	Homo sampiens
ENCFF822ZQZ	ENCBS273PSC	ENCSR645FBM	H3K4me3-human	UBERON:0001496	Ascending aorta	tissue	Homo sampiens
ENCFF573XGB	ENCBS373AAA	ENCSR657DYL	H3K4me3-human	EFO:0004905	Induced pluripotent stem cell	induced pluripotent stem cell line	Homo sampiens
ENCFF751FUQ	ENCBS368AAA	ENCSR657DYL	H3K4me3-human	EFO:0004905	Induced pluripotent stem cell	induced pluripotent stem cell line	Homo sampiens
ENCFF873HHG	ENCBS068KXI	ENCSR630OUQ	H3K4me3-human	EFO:0005904	H7-hESC	stem cell	Homo sampiens
ENCFF856OEK	ENCBS130NHB	ENCSR605QAV	H3K4me3-human	UBERON:0002369	Adrenal gland	tissue	Homo sampiens
ENCFF000CSL	ENCBS149EDI	ENCSR000AMW	H3K4me3-human	CL:0002553	Fibroblast of lung	primary cell	Homo sampiens
ENCFF000CSO	ENCBS339AAA	ENCSR000AMW	H3K4me3-human	CL:0002553	Fibroblast of lung	primary cell	Homo sampiens
ENCFF593NSI	ENCBS339AAA	ENCSR000AMW	H3K4me3-human	CL:0002553	Fibroblast of lung	primary cell	Homo sampiens
ENCFF953WAZ	ENCBS149EDI	ENCSR000AMW	H3K4me3-human	CL:0002553	Fibroblast of lung	primary cell	Homo sampiens
ENCFF263SAC	ENCBS463LFL	ENCSR505JQC	H3K4me3-human	EFO:0007105	iPS-18a	induced pluripotent stem cell line	Homo sampiens
ENCFF000BTA	ENCBS717AAA	ENCSR000AKN	H3K4me3-human	CL:0002618	Endothelial cell of umbilical vein	primary cell	Homo sampiens
ENCFF000BTB	ENCBS717AAA	ENCSR000AKN	H3K4me3-human	CL:0002618	Endothelial cell of umbilical vein	primary cell	Homo sampiens
ENCFF000BTC	ENCBS717AAA	ENCSR000AKN	H3K4me3-human	CL:0002618	Endothelial cell of umbilical vein	primary cell	Homo sampiens
ENCFF456FFM	ENCBS717AAA	ENCSR000AKN	H3K4me3-human	CL:0002618	Endothelial cell of umbilical vein	primary cell	Homo sampiens
ENCFF353JMR	ENCBS717AAA	ENCSR000AKN	H3K4me3-human	CL:0002618	Endothelial cell of umbilical vein	primary cell	Homo sampiens
ENCFF000BJA	ENCBS091ENC	ENCSR000AML	H3K4me3-human	CL:0002327	Mammary epithelial cell	primary cell	Homo sampiens
ENCFF000BJB	ENCBS045GHW	ENCSR000AML	H3K4me3-human	CL:0002327	Mammary epithelial cell	primary cell	Homo sampiens
ENCFF095KBB	ENCBS045GHW	ENCSR000AML	H3K4me3-human	CL:0002327	Mammary epithelial cell	primary cell	Homo sampiens
ENCFF037RFR	ENCBS091ENC	ENCSR000AML	H3K4me3-human	CL:0002327	Mammary epithelial cell	primary cell	Homo sampiens
ENCFF447EJD	ENCBS295NFS	ENCSR575RRX	H3K4me3-human	EFO:0001187	HepG2	immortalized cell line	Homo sampiens
ENCFF833HZR	ENCBS957WYL	ENCSR575RRX	H3K4me3-human	EFO:0001187	HepG2	immortalized cell line	Homo sampiens
ENCFF772QZH	ENCBS504GFW	ENCSR608VNA	H3K4me3-human	CL:0002319	Neural cell	in vitro differentiated cells	Homo sampiens
ENCFF736TXU	ENCBS737HIZ	ENCSR608VNA	H3K4me3-human	CL:0002319	Neural cell	in vitro differentiated cells	Homo sampiens
ENCFF000CDN	ENCBS188BKX	ENCSR000ASN	H3K4me3-human	CL:0001054	Monocytes-CD14+	primary cell	Homo sampiens
ENCFF000CDO	ENCBS865RXK	ENCSR000ASN	H3K4me3-human	CL:0001054	Monocytes-CD14+	primary cell	Homo sampiens
ENCFF469WQI	ENCBS012DXH	ENCSR501JET	H3K4me3-human	EFO:0000586	Mesenchymal stem cell	in vitro differentiated cells	Homo sampiens
ENCFF950ZSG	ENCBS725VAK	ENCSR501JET	H3K4me3-human	EFO:0000586	Mesenchymal stem cell	in vitro differentiated cells	Homo sampiens
ENCFF000BCN	ENCBS655ARO	ENCSR000AOF	H3K4me3-human	EFO:0002791	HeLa-S3	immortalized cell line	Homo sampiens
ENCFF000BCO	ENCBS075PNA	ENCSR000AOF	H3K4me3-human	EFO:0002791	HeLa-S3	immortalized cell line	Homo sampiens
ENCFF001ELO	ENCBS163AAA	ENCSR000DPD	H3K4me3-human	EFO:0001086	A549	immortalized cell line	Homo sampiens
ENCFF001ELP	ENCBS858LUL	ENCSR000DPD	H3K4me3-human	EFO:0001086	A549	immortalized cell line	Homo sampiens
ENCFF000AXK	ENCBS718AAA	ENCSR000AMG	H3K4me3-human	EFO:0003042	H1-hESC	stem cell	Homo sampiens
ENCFF000AXN	ENCBS718AAA	ENCSR000AMG	H3K4me3-human	EFO:0003042	H1-hESC	stem cell	Homo sampiens
ENCFF271RJC	ENCBS492AAA	ENCSR000FCS	H3K4me3-human	EFO:0003072	SK-N-SH	immortalized cell line	Homo sampiens
ENCFF316CYQ	ENCBS491AAA	ENCSR000FCS	H3K4me3-human	EFO:0003072	SK-N-SH	immortalized cell line	Homo sampiens
ENCFF001ETB	ENCBS192PUU	ENCSR000DQP	H3K4me3-human	CL:0000236	B cell	primary cell	Homo sampiens
ENCFF001ETD	ENCBS967QBI	ENCSR000DQP	H3K4me3-human	CL:0000236	B cell	primary cell	Homo sampiens
ENCFF933OOA	ENCBS606XXJ	ENCSR989RAL	H3K4me3-human	EFO:0007108	iPS-20b	induced pluripotent stem cell line	Homo sampiens
ENCFF601VOI	ENCBS391JPU	ENCSR989RAL	H3K4me3-human	EFO:0007108	iPS-20b	induced pluripotent stem cell line	Homo sampiens
ENCFF866SJL	ENCBS789UPK	ENCSR985MIB	H3K4me3-human	EFO:0001203	MCF-7	immortalized cell line	Homo sampiens
ENCFF503VVL	ENCBS967MVZ	ENCSR985MIB	H3K4me3-human	EFO:0001203	MCF-7	immortalized cell line	Homo sampiens
ENCFF000CON	ENCBS585ENC	ENCSR000ALO	H3K4me3-human	CL:0000312	Keratinocyte	primary cell	Homo sampiens
ENCFF000COO	ENCBS584ENC	ENCSR000ALO	H3K4me3-human	CL:0000312	Keratinocyte	primary cell	Homo sampiens
ENCFF000COQ	ENCBS935RSN	ENCSR000ALO	H3K4me3-human	CL:0000312	Keratinocyte	primary cell	Homo sampiens
ENCFF174BJB	ENCBS585ENC	ENCSR000ALO	H3K4me3-human	CL:0000312	Keratinocyte	primary cell	Homo sampiens
ENCFF747OGU	ENCBS584ENC	ENCSR000ALO	H3K4me3-human	CL:0000312	Keratinocyte	primary cell	Homo sampiens
ENCFF532VHS	ENCBS087RTK	ENCSR888WZL	H3K4me3-human	EFO:0007096	iPS DF 19.11	induced pluripotent stem cell line	Homo sampiens
ENCFF052TYC	ENCBS972ZOZ	ENCSR888WZL	H3K4me3-human	EFO:0007096	iPS DF 19.11	induced pluripotent stem cell line	Homo sampiens
ENCFF000CTK	ENCBS341AAA	ENCSR000ATH	H3K4me3-human	CL:0000062	Osteoblast	primary cell	Homo sampiens
ENCFF000CTM	ENCBS653BJC	ENCSR000ATH	H3K4me3-human	CL:0000062	Osteoblast	primary cell	Homo sampiens
ENCFF000CTN	ENCBS341AAA	ENCSR000ATH	H3K4me3-human	CL:0000062	Osteoblast	primary cell	Homo sampiens
ENCFF000CKT	ENCBS337AAA	ENCSR000APR	H3K4me3-human	CL:0002551	Fibroblast of dermis	primary cell	Homo sampiens
ENCFF000CKW	ENCBS337AAA	ENCSR000APR	H3K4me3-human	CL:0002551	Fibroblast of dermis	primary cell	Homo sampiens
ENCFF000BFW	ENCBS295NFS	ENCSR000AMP	H3K4me3-human	EFO:0001187	HepG2	immortalized cell line	Homo sampiens
ENCFF000BFX	ENCBS743JKX	ENCSR000AMP	H3K4me3-human	EFO:0001187	HepG2	immortalized cell line	Homo sampiens
ENCFF554AJT	ENCBS295NFS	ENCSR000AMP	H3K4me3-human	EFO:0001187	HepG2	immortalized cell line	Homo sampiens
ENCFF942HPS	ENCBS743JKX	ENCSR000AMP	H3K4me3-human	EFO:0001187	HepG2	immortalized cell line	Homo sampiens
ENCFF955YGZ	ENCBS532LWE	ENCSR043VGU	H3K4me3-human	EFO:0003045	H9	stem cell	Homo sampiens
ENCFF190YKE	ENCBS808UWK	ENCSR043VGU	H3K4me3-human	EFO:0003045	H9	stem cell	Homo sampiens
ENCFF000ASE	ENCBS830CIQ	ENCSR000AKA	H3K4me3-human	EFO:0002784	GM12878	immortalized cell line	Homo sampiens
ENCFF000ATQ	ENCBS830CIQ	ENCSR000AKA	H3K4me3-human	EFO:0002784	GM12878	immortalized cell line	Homo sampiens
ENCFF000ATS	ENCBS715VCP	ENCSR000AKA	H3K4me3-human	EFO:0002784	GM12878	immortalized cell line	Homo sampiens
ENCFF788INU	ENCBS715VCP	ENCSR000AKA	H3K4me3-human	EFO:0002784	GM12878	immortalized cell line	Homo sampiens
ENCFF338DBV	ENCBS830CIQ	ENCSR000AKA	H3K4me3-human	EFO:0002784	GM12878	immortalized cell line	Homo sampiens
ENCFF285ZJI	ENCBS945MCY	ENCSR443YAS	H3K4me3-human	EFO:0003042	H1-hESC	stem cell	Homo sampiens
ENCFF737BUY	ENCBS368BPP	ENCSR443YAS	H3K4me3-human	EFO:0003042	H1-hESC	stem cell	Homo sampiens
ENCFF000VDL	ENCBS667AAA	ENCSR000EWA	H3K4me3-human	EFO:0002067	K562	immortalized cell line	Homo sampiens
ENCFF000VDM	ENCBS667AAA	ENCSR000EWA	H3K4me3-human	EFO:0002067	K562	immortalized cell line	Homo sampiens
ENCFF365EGU	ENCBS360EQL	ENCSR393SYU	H3K4me3-human	CL:0000775	Neutrophil	primary cell	Homo sampiens
ENCFF458TOS	ENCBS462VZJ	ENCSR393SYU	H3K4me3-human	CL:0000775	Neutrophil	primary cell	Homo sampiens
ENCFF914ONY	ENCBS977TKX	ENCSR622TNA	H3K4me3-human	EFO:0003042	H1-hESC	stem cell	Homo sampiens
ENCFF000APM	ENCBS282AAA	ENCSR000ARY	H3K9ac-human	EFO:0007074	DND-41	immortalized cell line	Homo sampiens
ENCFF000APN	ENCBS688JZQ	ENCSR000ARY	H3K9ac-human	EFO:0007074	DND-41	immortalized cell line	Homo sampiens
ENCFF244AMQ	ENCBS282AAA	ENCSR000ARY	H3K9ac-human	EFO:0007074	DND-41	immortalized cell line	Homo sampiens
ENCFF463TTX	ENCBS688JZQ	ENCSR000ARY	H3K9ac-human	EFO:0007074	DND-41	immortalized cell line	Homo sampiens
ENCFF000BTO	ENCBS717AAA	ENCSR000ALD	H3K9ac-human	CL:0002618	Endothelial cell of umbilical vein	primary cell	Homo sampiens
ENCFF000BTP	ENCBS717AAA	ENCSR000ALD	H3K9ac-human	CL:0002618	Endothelial cell of umbilical vein	primary cell	Homo sampiens
ENCFF000BTR	ENCBS717AAA	ENCSR000ALD	H3K9ac-human	CL:0002618	Endothelial cell of umbilical vein	primary cell	Homo sampiens
ENCFF317NWL	ENCBS717AAA	ENCSR000ALD	H3K9ac-human	CL:0002618	Endothelial cell of umbilical vein	primary cell	Homo sampiens
ENCFF158QUD	ENCBS717AAA	ENCSR000ALD	H3K9ac-human	CL:0002618	Endothelial cell of umbilical vein	primary cell	Homo sampiens
ENCFF831PBC	ENCBS717AAA	ENCSR000ALD	H3K9ac-human	CL:0002618	Endothelial cell of umbilical vein	primary cell	Homo sampiens
ENCFF000CDQ	ENCBS865RXK	ENCSR000ATF	H3K9ac-human	CL:0001054	Monocytes-CD14+	primary cell	Homo sampiens
ENCFF000CDU	ENCBS188BKX	ENCSR000ATF	H3K9ac-human	CL:0001054	Monocytes-CD14+	primary cell	Homo sampiens
ENCFF560GUS	ENCBS188BKX	ENCSR000ATF	H3K9ac-human	CL:0001054	Monocytes-CD14+	primary cell	Homo sampiens
ENCFF165JCA	ENCBS865RXK	ENCSR000ATF	H3K9ac-human	CL:0001054	Monocytes-CD14+	primary cell	Homo sampiens
ENCFF919QZP	ENCBS682HMC	ENCSR521AIV	H3K9ac-human	EFO:0005694	KMS-11	immortalized cell line	Homo sampiens
ENCFF375YSO	ENCBS987CHP	ENCSR521AIV	H3K9ac-human	EFO:0005694	KMS-11	immortalized cell line	Homo sampiens
ENCFF417IVB	ENCBS708EFA	ENCSR543IKB	H3K9ac-human	EFO:0007112	Loucy	immortalized cell line	Homo sampiens
ENCFF215UWC	ENCBS080PZG	ENCSR543IKB	H3K9ac-human	EFO:0007112	Loucy	immortalized cell line	Homo sampiens
ENCFF142ZMX	ENCBS273LIC	ENCSR111QAW	H3K9ac-human	EFO:0002860	SK-N-MC	immortalized cell line	Homo sampiens
ENCFF299FCW	ENCBS203EZT	ENCSR111QAW	H3K9ac-human	EFO:0002860	SK-N-MC	immortalized cell line	Homo sampiens
ENCFF000CSX	ENCBS149EDI	ENCSR000AMX	H3K9ac-human	CL:0002553	Fibroblast of lung	primary cell	Homo sampiens
ENCFF000CTA	ENCBS339AAA	ENCSR000AMX	H3K9ac-human	CL:0002553	Fibroblast of lung	primary cell	Homo sampiens
ENCFF610BSE	ENCBS149EDI	ENCSR000AMX	H3K9ac-human	CL:0002553	Fibroblast of lung	primary cell	Homo sampiens
ENCFF796VKG	ENCBS339AAA	ENCSR000AMX	H3K9ac-human	CL:0002553	Fibroblast of lung	primary cell	Homo sampiens
ENCFF508UQV	ENCBS789UPK	ENCSR056UBA	H3K9ac-human	EFO:0001203	MCF-7	immortalized cell line	Homo sampiens
ENCFF028LDS	ENCBS967MVZ	ENCSR056UBA	H3K9ac-human	EFO:0001203	MCF-7	immortalized cell line	Homo sampiens
ENCFF515WGX	ENCBS311AAZ	ENCSR958WOY	H3K9ac-human	EFO:0005904	H7-hESC	stem cell	Homo sampiens
ENCFF000BCW	ENCBS075PNA	ENCSR000AOH	H3K9ac-human	EFO:0002791	HeLa-S3	immortalized cell line	Homo sampiens
ENCFF000BCX	ENCBS655ARO	ENCSR000AOH	H3K9ac-human	EFO:0002791	HeLa-S3	immortalized cell line	Homo sampiens
ENCFF203MBP	ENCBS075PNA	ENCSR000AOH	H3K9ac-human	EFO:0002791	HeLa-S3	immortalized cell line	Homo sampiens
ENCFF112SRH	ENCBS655ARO	ENCSR000AOH	H3K9ac-human	EFO:0002791	HeLa-S3	immortalized cell line	Homo sampiens
ENCFF762GQQ	ENCBS530IZG	ENCSR583ALI	H3K9ac-human	EFO:0007086	HUES6	stem cell	Homo sampiens
ENCFF145MQT	ENCBS018GXW	ENCSR996GHD	H3K9ac-human	EFO:0006710	OCI-LY3	immortalized cell line	Homo sampiens
ENCFF520UXW	ENCBS757GPD	ENCSR996GHD	H3K9ac-human	EFO:0006710	OCI-LY3	immortalized cell line	Homo sampiens
ENCFF579XYN	ENCBS136LHJ	ENCSR114GLZ	H3K9ac-human	EFO:0002357	SUDHL6	immortalized cell line	Homo sampiens
ENCFF242LZF	ENCBS107PVI	ENCSR114GLZ	H3K9ac-human	EFO:0002357	SUDHL6	immortalized cell line	Homo sampiens
ENCFF637SGJ	ENCBS372AAA	ENCSR562MOC	H3K9ac-human	CL:2000015	Fibroblast of arm	primary cell	Homo sampiens
ENCFF554OSQ	ENCBS367AAA	ENCSR562MOC	H3K9ac-human	CL:2000015	Fibroblast of arm	primary cell	Homo sampiens
ENCFF000BPX	ENCBS276EMT	ENCSR000AOY	H3K9ac-human	CL:0002372	Myotube	in vitro differentiated cells	Homo sampiens
ENCFF000BQA	ENCBS639UHS	ENCSR000AOY	H3K9ac-human	CL:0002372	Myotube	in vitro differentiated cells	Homo sampiens
ENCFF272XTN	ENCBS276EMT	ENCSR000AOY	H3K9ac-human	CL:0002372	Myotube	in vitro differentiated cells	Homo sampiens
ENCFF463WQD	ENCBS639UHS	ENCSR000AOY	H3K9ac-human	CL:0002372	Myotube	in vitro differentiated cells	Homo sampiens
ENCFF263ROW	ENCBS099BXQ	ENCSR335ELI	H3K9ac-human	EFO:0007083	HUES48	stem cell	Homo sampiens
ENCFF896GYO	ENCBS203SNR	ENCSR335ELI	H3K9ac-human	EFO:0007083	HUES48	stem cell	Homo sampiens
ENCFF000BYK	ENCBS639AAA	ENCSR000AKV	H3K9ac-human	EFO:0002067	K562	immortalized cell line	Homo sampiens
ENCFF000BYL	ENCBS674MPN	ENCSR000AKV	H3K9ac-human	EFO:0002067	K562	immortalized cell line	Homo sampiens
ENCFF355NBA	ENCBS674MPN	ENCSR000AKV	H3K9ac-human	EFO:0002067	K562	immortalized cell line	Homo sampiens
ENCFF501UKW	ENCBS639AAA	ENCSR000AKV	H3K9ac-human	EFO:0002067	K562	immortalized cell line	Homo sampiens
ENCFF000VIA	ENCBS810EWQ	ENCSR000EXC	H3K9ac-human	EFO:0005236	NTERA-2	immortalized cell line	Homo sampiens
ENCFF000VID	ENCBS810EWQ	ENCSR000EXC	H3K9ac-human	EFO:0005236	NTERA-2	immortalized cell line	Homo sampiens
ENCFF144YZK	ENCBS810EWQ	ENCSR000EXC	H3K9ac-human	EFO:0005236	NTERA-2	immortalized cell line	Homo sampiens
ENCFF493LSP	ENCBS810EWQ	ENCSR000EXC	H3K9ac-human	EFO:0005236	NTERA-2	immortalized cell line	Homo sampiens
ENCFF000BJM	ENCBS091ENC	ENCSR000ALZ	H3K9ac-human	CL:0002327	Mammary epithelial cell	primary cell	Homo sampiens
ENCFF000BJQ	ENCBS045GHW	ENCSR000ALZ	H3K9ac-human	CL:0002327	Mammary epithelial cell	primary cell	Homo sampiens
ENCFF114UET	ENCBS045GHW	ENCSR000ALZ	H3K9ac-human	CL:0002327	Mammary epithelial cell	primary cell	Homo sampiens
ENCFF995ZHH	ENCBS091ENC	ENCSR000ALZ	H3K9ac-human	CL:0002327	Mammary epithelial cell	primary cell	Homo sampiens
ENCFF143BFS	ENCBS596CTT	ENCSR197QXT	H3K9ac-human	EFO:0002074	PC-3	immortalized cell line	Homo sampiens
ENCFF536BRS	ENCBS451OVM	ENCSR197QXT	H3K9ac-human	EFO:0002074	PC-3	immortalized cell line	Homo sampiens
ENCFF543CTE	ENCBS836CYW	ENCSR799SLA	H3K9ac-human	CL:0000236	B cell	primary cell	Homo sampiens
ENCFF256MNM	ENCBS098ETX	ENCSR799SLA	H3K9ac-human	CL:0000236	B cell	primary cell	Homo sampiens
ENCFF897HSG	ENCBS850UIV	ENCSR058SHN	H3K9ac-human	EFO:0005719	Karpas-422	immortalized cell line	Homo sampiens
ENCFF608QHI	ENCBS171YVY	ENCSR058SHN	H3K9ac-human	EFO:0005719	Karpas-422	immortalized cell line	Homo sampiens
ENCFF211UJG	ENCBS987JQH	ENCSR945KBK	H3K9ac-human	EFO:0002847	PC-9	immortalized cell line	Homo sampiens
ENCFF119JZT	ENCBS177ANS	ENCSR945KBK	H3K9ac-human	EFO:0002847	PC-9	immortalized cell line	Homo sampiens
ENCFF635WUS	ENCBS324TZB	ENCSR121INC	H3K9ac-human	EFO:0003072	SK-N-SH	immortalized cell line	Homo sampiens
ENCFF120ITP	ENCBS018DDZ	ENCSR121INC	H3K9ac-human	EFO:0003072	SK-N-SH	immortalized cell line	Homo sampiens
ENCFF201ZUR	ENCBS504GFW	ENCSR531QHM	H3K9ac-human	CL:0002319	Neural cell	in vitro differentiated cells	Homo sampiens
ENCFF683XFR	ENCBS737HIZ	ENCSR531QHM	H3K9ac-human	CL:0002319	Neural cell	in vitro differentiated cells	Homo sampiens
ENCFF988WNN	ENCBS729LWO	ENCSR076JBA	H3K9ac-human	EFO:0005907	OCI-LY1	immortalized cell line	Homo sampiens
ENCFF102DQM	ENCBS397COL	ENCSR076JBA	H3K9ac-human	EFO:0005907	OCI-LY1	immortalized cell line	Homo sampiens
ENCFF482QTK	ENCBS373AAA	ENCSR550UQS	H3K9ac-human	EFO:0004905	Induced pluripotent stem cell	induced pluripotent stem cell line	Homo sampiens
ENCFF916MNW	ENCBS368AAA	ENCSR550UQS	H3K9ac-human	EFO:0004905	Induced pluripotent stem cell	induced pluripotent stem cell line	Homo sampiens
ENCFF133VFA	ENCBS494OPB	ENCSR093SHE	H3K9ac-human	EFO:0002824	HCT116	immortalized cell line	Homo sampiens
ENCFF166HTQ	ENCBS851PYB	ENCSR093SHE	H3K9ac-human	EFO:0002824	HCT116	immortalized cell line	Homo sampiens
ENCFF743YMG	ENCBS018TPT	ENCSR105NMJ	H3K9ac-human	NTR:0000711	Neural progenitor cell	in vitro differentiated cells	Homo sampiens
ENCFF780AAY	ENCBS044KWE	ENCSR105NMJ	H3K9ac-human	NTR:0000711	Neural progenitor cell	in vitro differentiated cells	Homo sampiens
ENCFF734WKE	ENCBS448IJH	ENCSR848EZM	H3K9ac-human	EFO:0007102	iPS-15b	induced pluripotent stem cell line	Homo sampiens
ENCFF129JTM	ENCBS077RUJ	ENCSR850ODD	H3K9ac-human	CL:0000182	Hepatocyte	in vitro differentiated cells	Homo sampiens
ENCFF905RYT	ENCBS520VFV	ENCSR850ODD	H3K9ac-human	CL:0000182	Hepatocyte	in vitro differentiated cells	Homo sampiens
ENCFF151DQI	ENCBS374AAA	ENCSR592ETL	H3K9ac-human	NTR:0000560	Bipolar spindle neuron	in vitro differentiated cells	Homo sampiens
ENCFF000AXW	ENCBS718AAA	ENCSR000AND	H3K9ac-human	EFO:0003042	H1-hESC	stem cell	Homo sampiens
ENCFF000AXY	ENCBS718AAA	ENCSR000AND	H3K9ac-human	EFO:0003042	H1-hESC	stem cell	Homo sampiens
ENCFF875JYW	ENCBS718AAA	ENCSR000AND	H3K9ac-human	EFO:0003042	H1-hESC	stem cell	Homo sampiens
ENCFF009NVQ	ENCBS718AAA	ENCSR000AND	H3K9ac-human	EFO:0003042	H1-hESC	stem cell	Homo sampiens
ENCFF000CPB	ENCBS584ENC	ENCSR000ALP	H3K9ac-human	CL:0000312	Keratinocyte	primary cell	Homo sampiens
ENCFF000CPC	ENCBS585ENC	ENCSR000ALP	H3K9ac-human	CL:0000312	Keratinocyte	primary cell	Homo sampiens
ENCFF000CPE	ENCBS935RSN	ENCSR000ALP	H3K9ac-human	CL:0000312	Keratinocyte	primary cell	Homo sampiens
ENCFF039LPD	ENCBS935RSN	ENCSR000ALP	H3K9ac-human	CL:0000312	Keratinocyte	primary cell	Homo sampiens
ENCFF284YVY	ENCBS585ENC	ENCSR000ALP	H3K9ac-human	CL:0000312	Keratinocyte	primary cell	Homo sampiens
ENCFF940EVD	ENCBS584ENC	ENCSR000ALP	H3K9ac-human	CL:0000312	Keratinocyte	primary cell	Homo sampiens
ENCFF000CGM	ENCBS248DIP	ENCSR000ART	H3K9ac-human	CL:0000127	Astrocyte	primary cell	Homo sampiens
ENCFF000CGN	ENCBS018VIR	ENCSR000ART	H3K9ac-human	CL:0000127	Astrocyte	primary cell	Homo sampiens
ENCFF932JSP	ENCBS018VIR	ENCSR000ART	H3K9ac-human	CL:0000127	Astrocyte	primary cell	Homo sampiens
ENCFF684NWM	ENCBS248DIP	ENCSR000ART	H3K9ac-human	CL:0000127	Astrocyte	primary cell	Homo sampiens
ENCFF573OIB	ENCBS571AQH	ENCSR327OGS	H3K9ac-human	EFO:0001221	Myeloma	immortalized cell line	Homo sampiens
ENCFF686XVR	ENCBS197CBA	ENCSR327OGS	H3K9ac-human	EFO:0001221	Myeloma	immortalized cell line	Homo sampiens
ENCFF855IAW	ENCBS015UPH	ENCSR470PLJ	H3K9ac-human	EFO:0007089	HUES64	stem cell	Homo sampiens
ENCFF593KQL	ENCBS389KQW	ENCSR470PLJ	H3K9ac-human	EFO:0007089	HUES64	stem cell	Homo sampiens
ENCFF000ATY	ENCBS715VCP	ENCSR000AKH	H3K9ac-human	EFO:0002784	GM12878	immortalized cell line	Homo sampiens
ENCFF000AUA	ENCBS830CIQ	ENCSR000AKH	H3K9ac-human	EFO:0002784	GM12878	immortalized cell line	Homo sampiens
ENCFF415YCS	ENCBS715VCP	ENCSR000AKH	H3K9ac-human	EFO:0002784	GM12878	immortalized cell line	Homo sampiens
ENCFF674BEP	ENCBS830CIQ	ENCSR000AKH	H3K9ac-human	EFO:0002784	GM12878	immortalized cell line	Homo sampiens
ENCFF000CLI	ENCBS311WGW	ENCSR000APS	H3K9ac-human	CL:0002551	Fibroblast of dermis	primary cell	Homo sampiens
ENCFF000CLK	ENCBS617RCN	ENCSR000APS	H3K9ac-human	CL:0002551	Fibroblast of dermis	primary cell	Homo sampiens
ENCFF069PTX	ENCBS311WGW	ENCSR000APS	H3K9ac-human	CL:0002551	Fibroblast of dermis	primary cell	Homo sampiens
ENCFF390VDG	ENCBS617RCN	ENCSR000APS	H3K9ac-human	CL:0002551	Fibroblast of dermis	primary cell	Homo sampiens
ENCFF000AJO	ENCBS161AAA	ENCSR000ASV	H3K9ac-human	EFO:0001086	A549	immortalized cell line	Homo sampiens
ENCFF000AJR	ENCBS161AAA	ENCSR000ASV	H3K9ac-human	EFO:0001086	A549	immortalized cell line	Homo sampiens
ENCFF965KEO	ENCBS161AAA	ENCSR000ASV	H3K9ac-human	EFO:0001086	A549	immortalized cell line	Homo sampiens
ENCFF017SPM	ENCBS161AAA	ENCSR000ASV	H3K9ac-human	EFO:0001086	A549	immortalized cell line	Homo sampiens
ENCFF995EDE	ENCBS886BJZ	ENCSR660IQK	H3K9ac-human	EFO:0006711	OCI-LY7	immortalized cell line	Homo sampiens
ENCFF030MSL	ENCBS699NWP	ENCSR660IQK	H3K9ac-human	EFO:0006711	OCI-LY7	immortalized cell line	Homo sampiens
ENCFF000BMM	ENCBS023XCT	ENCSR000ANL	H3K9ac-human	CL:0000515	Skeletal muscle myoblast	primary cell	Homo sampiens
ENCFF000BMN	ENCBS914GNL	ENCSR000ANL	H3K9ac-human	CL:0000515	Skeletal muscle myoblast	primary cell	Homo sampiens
ENCFF620FOE	ENCBS914GNL	ENCSR000ANL	H3K9ac-human	CL:0000515	Skeletal muscle myoblast	primary cell	Homo sampiens
ENCFF413EDN	ENCBS023XCT	ENCSR000ANL	H3K9ac-human	CL:0000515	Skeletal muscle myoblast	primary cell	Homo sampiens
ENCFF180YTK	ENCBS780PCJ	ENCSR540UZV	H3K9ac-human	CL:0000192	Smooth muscle cell	in vitro differentiated cells	Homo sampiens
ENCFF054NRD	ENCBS899TTJ	ENCSR540UZV	H3K9ac-human	CL:0000192	Smooth muscle cell	in vitro differentiated cells	Homo sampiens
ENCFF824WPH	ENCBS981ZAE	ENCSR872PRJ	H3K9ac-human	EFO:0005724	MM.1S	immortalized cell line	Homo sampiens
ENCFF123NHU	ENCBS241TLI	ENCSR872PRJ	H3K9ac-human	EFO:0005724	MM.1S	immortalized cell line	Homo sampiens
ENCFF757EUL	ENCBS776ACY	ENCSR626UPW	H3K9ac-human	CL:0000047	Neuronal stem cell	stem cell	Homo sampiens
ENCFF986TEV	ENCBS463LFL	ENCSR842ASU	H3K9ac-human	EFO:0007105	iPS-18a	induced pluripotent stem cell line	Homo sampiens
ENCFF833AKX	ENCBS851LMU	ENCSR601EJM	H3K9ac-human	EFO:0007107	iPS-18c	induced pluripotent stem cell line	Homo sampiens
ENCFF343YPM	ENCBS606XXJ	ENCSR166KLM	H3K9ac-human	EFO:0007108	iPS-20b	induced pluripotent stem cell line	Homo sampiens
ENCFF801PZS	ENCBS391JPU	ENCSR166KLM	H3K9ac-human	EFO:0007108	iPS-20b	induced pluripotent stem cell line	Homo sampiens
ENCFF790QRR	ENCBS532LWE	ENCSR879TAS	H3K9ac-human	EFO:0003045	H9	stem cell	Homo sampiens
ENCFF994HSC	ENCBS808UWK	ENCSR879TAS	H3K9ac-human	EFO:0003045	H9	stem cell	Homo sampiens
ENCFF000BGJ	ENCBS743JKX	ENCSR000AMD	H3K9ac-human	EFO:0001187	HepG2	immortalized cell line	Homo sampiens
ENCFF000BGK	ENCBS295NFS	ENCSR000AMD	H3K9ac-human	EFO:0001187	HepG2	immortalized cell line	Homo sampiens
ENCFF194LQS	ENCBS743JKX	ENCSR000AMD	H3K9ac-human	EFO:0001187	HepG2	immortalized cell line	Homo sampiens
ENCFF243VAM	ENCBS295NFS	ENCSR000AMD	H3K9ac-human	EFO:0001187	HepG2	immortalized cell line	Homo sampiens
ENCFF000VDR	ENCBS667AAA	ENCSR000EVZ	H3K9ac-human	EFO:0002067	K562	immortalized cell line	Homo sampiens
ENCFF000VDS	ENCBS667AAA	ENCSR000EVZ	H3K9ac-human	EFO:0002067	K562	immortalized cell line	Homo sampiens
ENCFF576SWI	ENCBS667AAA	ENCSR000EVZ	H3K9ac-human	EFO:0002067	K562	immortalized cell line	Homo sampiens
ENCFF606ADT	ENCBS667AAA	ENCSR000EVZ	H3K9ac-human	EFO:0002067	K562	immortalized cell line	Homo sampiens
ENCFF204DNG	ENCBS667AAA	ENCSR000EVZ	H3K9ac-human	EFO:0002067	K562	immortalized cell line	Homo sampiens
ENCFF032SBV	ENCBS667AAA	ENCSR000EVZ	H3K9ac-human	EFO:0002067	K562	immortalized cell line	Homo sampiens
ENCFF218OBY	ENCBS977TKX	ENCSR441UHO	H3K9ac-human	EFO:0003042	H1-hESC	stem cell	Homo sampiens
ENCFF763UWS	ENCBS945MCY	ENCSR441UHO	H3K9ac-human	EFO:0003042	H1-hESC	stem cell	Homo sampiens

## Sheet: Table S3_TF experiments
file accession	biosample	experiment	target	cell type	cell line	cell info	organism
ENCFF503INV	ENCBS320BUL	ENCSR822CCM	ARID1B-human	EFO:0002067	K562	immortalized cell line	Homo sampiens
ENCFF919XGC	ENCBS906KIP	ENCSR822CCM	ARID1B-human	EFO:0002067	K562	immortalized cell line	Homo sampiens
ENCFF204XOT	ENCBS637YEV	ENCSR231ENE	ARID3A-human	EFO:0001203	MCF-7	immortalized cell line	Homo sampiens
ENCFF477KIN	ENCBS183ZAS	ENCSR231ENE	ARID3A-human	EFO:0001203	MCF-7	immortalized cell line	Homo sampiens
ENCFF000XOP	ENCBS638AAA	ENCSR000EDP	ARID3A-human	EFO:0001187	HepG2	immortalized cell line	Homo sampiens
ENCFF000XOQ	ENCBS638AAA	ENCSR000EDP	ARID3A-human	EFO:0001187	HepG2	immortalized cell line	Homo sampiens
ENCFF298ULI	ENCBS638AAA	ENCSR000EDP	ARID3A-human	EFO:0001187	HepG2	immortalized cell line	Homo sampiens
ENCFF384OAK	ENCBS638AAA	ENCSR000EDP	ARID3A-human	EFO:0001187	HepG2	immortalized cell line	Homo sampiens
ENCFF717MOF	ENCBS519VWT	ENCSR778UBR	ARID3A-human	EFO:0002784	GM12878	immortalized cell line	Homo sampiens
ENCFF655HZW	ENCBS594YOH	ENCSR778UBR	ARID3A-human	EFO:0002784	GM12878	immortalized cell line	Homo sampiens
ENCFF000YEY	ENCBS039ENC	ENCSR000EFY	ARID3A-human	EFO:0002067	K562	immortalized cell line	Homo sampiens
ENCFF000YFA	ENCBS039ENC	ENCSR000EFY	ARID3A-human	EFO:0002067	K562	immortalized cell line	Homo sampiens
ENCFF102ROD	ENCBS039ENC	ENCSR000EFY	ARID3A-human	EFO:0002067	K562	immortalized cell line	Homo sampiens
ENCFF992ORW	ENCBS039ENC	ENCSR000EFY	ARID3A-human	EFO:0002067	K562	immortalized cell line	Homo sampiens
ENCFF367QVT	ENCBS465MWC	ENCSR155KHM	ARNT-human	EFO:0002067	K562	immortalized cell line	Homo sampiens
ENCFF518IYV	ENCBS783WYV	ENCSR155KHM	ARNT-human	EFO:0002067	K562	immortalized cell line	Homo sampiens
ENCFF948XRU	ENCBS839CNN	ENCSR613NUC	ARNT-human	EFO:0002067	K562	immortalized cell line	Homo sampiens
ENCFF921BVG	ENCBS603CUX	ENCSR613NUC	ARNT-human	EFO:0002067	K562	immortalized cell line	Homo sampiens
ENCFF221MEC	ENCBS777STD	ENCSR029IBC	ARNT-human	EFO:0001187	HepG2	immortalized cell line	Homo sampiens
ENCFF316MDQ	ENCBS591PPP	ENCSR029IBC	ARNT-human	EFO:0001187	HepG2	immortalized cell line	Homo sampiens
ENCFF562TOQ	ENCBS830FPU	ENCSR849WCQ	ASH2L-human	EFO:0002784	GM12878	immortalized cell line	Homo sampiens
ENCFF485RWA	ENCBS155GIM	ENCSR849WCQ	ASH2L-human	EFO:0002784	GM12878	immortalized cell line	Homo sampiens
ENCFF000YFF	ENCBS039ENC	ENCSR000DNZ	ATF1-human	EFO:0002067	K562	immortalized cell line	Homo sampiens
ENCFF000YFI	ENCBS039ENC	ENCSR000DNZ	ATF1-human	EFO:0002067	K562	immortalized cell line	Homo sampiens
ENCFF000OME	ENCBS111ENC	ENCSR000BQU	ATF2-human	EFO:0003042	H1-hESC	stem cell	Homo sampiens
ENCFF000OMH	ENCBS111ENC	ENCSR000BQU	ATF2-human	EFO:0003042	H1-hESC	stem cell	Homo sampiens
ENCFF781WUR	ENCBS111ENC	ENCSR000BQU	ATF2-human	EFO:0003042	H1-hESC	stem cell	Homo sampiens
ENCFF256LCE	ENCBS111ENC	ENCSR000BQU	ATF2-human	EFO:0003042	H1-hESC	stem cell	Homo sampiens
ENCFF572HWU	ENCBS591PPP	ENCSR047BUZ	ATF2-human	EFO:0001187	HepG2	immortalized cell line	Homo sampiens
ENCFF824TEZ	ENCBS225ERF	ENCSR047BUZ	ATF2-human	EFO:0001187	HepG2	immortalized cell line	Homo sampiens
ENCFF780VWO	ENCBS389LEA	ENCSR961PPA	ATF2-human	EFO:0002784	GM12878	immortalized cell line	Homo sampiens
ENCFF579YLW	ENCBS891HAO	ENCSR961PPA	ATF2-human	EFO:0002784	GM12878	immortalized cell line	Homo sampiens
ENCFF000NRS	ENCBS110ENC	ENCSR000BQK	ATF2-human	EFO:0002784	GM12878	immortalized cell line	Homo sampiens
ENCFF000NRT	ENCBS110ENC	ENCSR000BQK	ATF2-human	EFO:0002784	GM12878	immortalized cell line	Homo sampiens
ENCFF221PEC	ENCBS110ENC	ENCSR000BQK	ATF2-human	EFO:0002784	GM12878	immortalized cell line	Homo sampiens
ENCFF957MQC	ENCBS110ENC	ENCSR000BQK	ATF2-human	EFO:0002784	GM12878	immortalized cell line	Homo sampiens
ENCFF085AZW	ENCBS697XFI	ENCSR869IUD	ATF2-human	EFO:0002067	K562	immortalized cell line	Homo sampiens
ENCFF295OIX	ENCBS850QNJ	ENCSR869IUD	ATF2-human	EFO:0002067	K562	immortalized cell line	Homo sampiens
ENCFF000PVN	ENCBS109ENC	ENCSR000BNU	ATF3-human	EFO:0002067	K562	immortalized cell line	Homo sampiens
ENCFF000PVR	ENCBS109ENC	ENCSR000BNU	ATF3-human	EFO:0002067	K562	immortalized cell line	Homo sampiens
ENCFF849WYX	ENCBS109ENC	ENCSR000BNU	ATF3-human	EFO:0002067	K562	immortalized cell line	Homo sampiens
ENCFF747HGM	ENCBS109ENC	ENCSR000BNU	ATF3-human	EFO:0002067	K562	immortalized cell line	Homo sampiens
ENCFF000PFE	ENCBS114ENC	ENCSR000BKE	ATF3-human	EFO:0001187	HepG2	immortalized cell line	Homo sampiens
ENCFF000PFH	ENCBS114ENC	ENCSR000BKE	ATF3-human	EFO:0001187	HepG2	immortalized cell line	Homo sampiens
ENCFF081GVK	ENCBS114ENC	ENCSR000BKE	ATF3-human	EFO:0001187	HepG2	immortalized cell line	Homo sampiens
ENCFF906RQV	ENCBS114ENC	ENCSR000BKE	ATF3-human	EFO:0001187	HepG2	immortalized cell line	Homo sampiens
ENCFF000MWK	ENCBS423ENC	ENCSR000BPS	ATF3-human	EFO:0001086	A549	immortalized cell line	Homo sampiens
ENCFF000MWL	ENCBS423ENC	ENCSR000BPS	ATF3-human	EFO:0001086	A549	immortalized cell line	Homo sampiens
ENCFF214OIG	ENCBS423ENC	ENCSR000BPS	ATF3-human	EFO:0001086	A549	immortalized cell line	Homo sampiens
ENCFF488IBU	ENCBS423ENC	ENCSR000BPS	ATF3-human	EFO:0001086	A549	immortalized cell line	Homo sampiens
ENCFF000OMM	ENCBS111ENC	ENCSR000BKC	ATF3-human	EFO:0003042	H1-hESC	stem cell	Homo sampiens
ENCFF000OMO	ENCBS111ENC	ENCSR000BKC	ATF3-human	EFO:0003042	H1-hESC	stem cell	Homo sampiens
ENCFF117FPW	ENCBS111ENC	ENCSR000BKC	ATF3-human	EFO:0003042	H1-hESC	stem cell	Homo sampiens
ENCFF266SYC	ENCBS111ENC	ENCSR000BKC	ATF3-human	EFO:0003042	H1-hESC	stem cell	Homo sampiens
ENCFF000NSA	ENCBS110ENC	ENCSR000BJY	ATF3-human	EFO:0002784	GM12878	immortalized cell line	Homo sampiens
ENCFF000NSD	ENCBS110ENC	ENCSR000BJY	ATF3-human	EFO:0002784	GM12878	immortalized cell line	Homo sampiens
ENCFF807PEN	ENCBS110ENC	ENCSR000BJY	ATF3-human	EFO:0002784	GM12878	immortalized cell line	Homo sampiens
ENCFF938UKB	ENCBS110ENC	ENCSR000BJY	ATF3-human	EFO:0002784	GM12878	immortalized cell line	Homo sampiens
ENCFF476XCQ	ENCBS401URL	ENCSR205FOW	ATF3-human	UBERON:0002107	Liver	tissue	Homo sampiens
ENCFF069OPS	ENCBS401URL	ENCSR205FOW	ATF3-human	UBERON:0002107	Liver	tissue	Homo sampiens
ENCFF978VQG	ENCBS046RNA	ENCSR480LIS	ATF3-human	UBERON:0002107	Liver	tissue	Homo sampiens
ENCFF595XJJ	ENCBS046RNA	ENCSR480LIS	ATF3-human	UBERON:0002107	Liver	tissue	Homo sampiens
ENCFF000YFJ	ENCBS039ENC	ENCSR000DOG	ATF3-human	EFO:0002067	K562	immortalized cell line	Homo sampiens
ENCFF000YFM	ENCBS039ENC	ENCSR000DOG	ATF3-human	EFO:0002067	K562	immortalized cell line	Homo sampiens
ENCFF000OXU	ENCBS389ENC	ENCSR000BUG	ATF3-human	EFO:0002824	HCT116	immortalized cell line	Homo sampiens
ENCFF000OXX	ENCBS389ENC	ENCSR000BUG	ATF3-human	EFO:0002824	HCT116	immortalized cell line	Homo sampiens
ENCFF665UFO	ENCBS488GLI	ENCSR636MKU	BACH1-human	EFO:0002784	GM12878	immortalized cell line	Homo sampiens
ENCFF209ASC	ENCBS519VWT	ENCSR636MKU	BACH1-human	EFO:0002784	GM12878	immortalized cell line	Homo sampiens
ENCFF685MVD	ENCBS595CWJ	ENCSR585CVE	BACH1-human	EFO:0002784	GM12878	immortalized cell line	Homo sampiens
ENCFF362FJC	ENCBS976FSZ	ENCSR585CVE	BACH1-human	EFO:0002784	GM12878	immortalized cell line	Homo sampiens
ENCFF000WQG	ENCBS854AAA	ENCSR000EBQ	BACH1-human	EFO:0003042	H1-hESC	stem cell	Homo sampiens
ENCFF000WQP	ENCBS854AAA	ENCSR000EBQ	BACH1-human	EFO:0003042	H1-hESC	stem cell	Homo sampiens
ENCFF195GBJ	ENCBS854AAA	ENCSR000EBQ	BACH1-human	EFO:0003042	H1-hESC	stem cell	Homo sampiens
ENCFF752RXF	ENCBS854AAA	ENCSR000EBQ	BACH1-human	EFO:0003042	H1-hESC	stem cell	Homo sampiens
ENCFF000YFN	ENCBS039ENC	ENCSR000EGD	BACH1-human	EFO:0002067	K562	immortalized cell line	Homo sampiens
ENCFF000YFU	ENCBS039ENC	ENCSR000EGD	BACH1-human	EFO:0002067	K562	immortalized cell line	Homo sampiens
ENCFF751ATX	ENCBS039ENC	ENCSR000EGD	BACH1-human	EFO:0002067	K562	immortalized cell line	Homo sampiens
ENCFF866OHV	ENCBS039ENC	ENCSR000EGD	BACH1-human	EFO:0002067	K562	immortalized cell line	Homo sampiens
ENCFF000NSJ	ENCBS110ENC	ENCSR000BGT	BATF-human	EFO:0002784	GM12878	immortalized cell line	Homo sampiens
ENCFF000NSN	ENCBS110ENC	ENCSR000BGT	BATF-human	EFO:0002784	GM12878	immortalized cell line	Homo sampiens
ENCFF558RVJ	ENCBS110ENC	ENCSR000BGT	BATF-human	EFO:0002784	GM12878	immortalized cell line	Homo sampiens
ENCFF850VBC	ENCBS110ENC	ENCSR000BGT	BATF-human	EFO:0002784	GM12878	immortalized cell line	Homo sampiens
ENCFF000OMT	ENCBS111ENC	ENCSR000BIP	BCL11A-human	EFO:0003042	H1-hESC	stem cell	Homo sampiens
ENCFF000NSQ	ENCBS110ENC	ENCSR000BHA	BCL11A-human	EFO:0002784	GM12878	immortalized cell line	Homo sampiens
ENCFF000NSU	ENCBS110ENC	ENCSR000BHA	BCL11A-human	EFO:0002784	GM12878	immortalized cell line	Homo sampiens
ENCFF197DUH	ENCBS110ENC	ENCSR000BHA	BCL11A-human	EFO:0002784	GM12878	immortalized cell line	Homo sampiens
ENCFF671MIT	ENCBS110ENC	ENCSR000BHA	BCL11A-human	EFO:0002784	GM12878	immortalized cell line	Homo sampiens
ENCFF000ONA	ENCBS111ENC	ENCSR000BMJ	BCL11A-human	EFO:0003042	H1-hESC	stem cell	Homo sampiens
ENCFF000MWO	ENCBS423ENC	ENCSR000BQH	BCL3-human	EFO:0001086	A549	immortalized cell line	Homo sampiens
ENCFF000MWS	ENCBS423ENC	ENCSR000BQH	BCL3-human	EFO:0001086	A549	immortalized cell line	Homo sampiens
ENCFF788NMA	ENCBS423ENC	ENCSR000BQH	BCL3-human	EFO:0001086	A549	immortalized cell line	Homo sampiens
ENCFF678LJA	ENCBS423ENC	ENCSR000BQH	BCL3-human	EFO:0001086	A549	immortalized cell line	Homo sampiens
ENCFF000NSY	ENCBS110ENC	ENCSR000BNQ	BCL3-human	EFO:0002784	GM12878	immortalized cell line	Homo sampiens
ENCFF000NTA	ENCBS110ENC	ENCSR000BNQ	BCL3-human	EFO:0002784	GM12878	immortalized cell line	Homo sampiens
ENCFF288XGA	ENCBS110ENC	ENCSR000BNQ	BCL3-human	EFO:0002784	GM12878	immortalized cell line	Homo sampiens
ENCFF032GHF	ENCBS110ENC	ENCSR000BNQ	BCL3-human	EFO:0002784	GM12878	immortalized cell line	Homo sampiens
ENCFF000NTF	ENCBS110ENC	ENCSR000BJZ	BCLAF1-human	EFO:0002784	GM12878	immortalized cell line	Homo sampiens
ENCFF000NTG	ENCBS110ENC	ENCSR000BJZ	BCLAF1-human	EFO:0002784	GM12878	immortalized cell line	Homo sampiens
ENCFF276KQJ	ENCBS110ENC	ENCSR000BJZ	BCLAF1-human	EFO:0002784	GM12878	immortalized cell line	Homo sampiens
ENCFF797QYH	ENCBS110ENC	ENCSR000BJZ	BCLAF1-human	EFO:0002784	GM12878	immortalized cell line	Homo sampiens
ENCFF000PWE	ENCBS109ENC	ENCSR000BKH	BCLAF1-human	EFO:0002067	K562	immortalized cell line	Homo sampiens
ENCFF000PWF	ENCBS109ENC	ENCSR000BKH	BCLAF1-human	EFO:0002067	K562	immortalized cell line	Homo sampiens
ENCFF477WUN	ENCBS109ENC	ENCSR000BKH	BCLAF1-human	EFO:0002067	K562	immortalized cell line	Homo sampiens
ENCFF144FIS	ENCBS109ENC	ENCSR000BKH	BCLAF1-human	EFO:0002067	K562	immortalized cell line	Homo sampiens
ENCFF687OFO	ENCBS357NWO	ENCSR492LTS	BCLAF1-human	EFO:0002067	K562	immortalized cell line	Homo sampiens
ENCFF623FBO	ENCBS664NTU	ENCSR492LTS	BCLAF1-human	EFO:0002067	K562	immortalized cell line	Homo sampiens
ENCFF367HYB	ENCBS465MWC	ENCSR808AKZ	BCOR-human	EFO:0002067	K562	immortalized cell line	Homo sampiens
ENCFF367UIT	ENCBS406RFF	ENCSR808AKZ	BCOR-human	EFO:0002067	K562	immortalized cell line	Homo sampiens
ENCFF000YFX	ENCBS039ENC	ENCSR000DOK	BDP1-human	EFO:0002067	K562	immortalized cell line	Homo sampiens
ENCFF000YFY	ENCBS039ENC	ENCSR000DOK	BDP1-human	EFO:0002067	K562	immortalized cell line	Homo sampiens
ENCFF000YGB	ENCBS039ENC	ENCSR000DOK	BDP1-human	EFO:0002067	K562	immortalized cell line	Homo sampiens
ENCFF000XAK	ENCBS637AAA	ENCSR000DNX	BDP1-human	EFO:0002791	HeLa-S3	immortalized cell line	Homo sampiens
ENCFF000XAL	ENCBS637AAA	ENCSR000DNX	BDP1-human	EFO:0002791	HeLa-S3	immortalized cell line	Homo sampiens
ENCFF000VOA	ENCBS159AAA	ENCSR000DYJ	BHLHE40-human	EFO:0001086	A549	immortalized cell line	Homo sampiens
ENCFF000VOB	ENCBS159AAA	ENCSR000DYJ	BHLHE40-human	EFO:0001086	A549	immortalized cell line	Homo sampiens
ENCFF081REB	ENCBS159AAA	ENCSR000DYJ	BHLHE40-human	EFO:0001086	A549	immortalized cell line	Homo sampiens
ENCFF004XEW	ENCBS159AAA	ENCSR000DYJ	BHLHE40-human	EFO:0001086	A549	immortalized cell line	Homo sampiens
ENCFF000XOX	ENCBS638AAA	ENCSR000EDT	BHLHE40-human	EFO:0001187	HepG2	immortalized cell line	Homo sampiens
ENCFF000XOY	ENCBS638AAA	ENCSR000EDT	BHLHE40-human	EFO:0001187	HepG2	immortalized cell line	Homo sampiens
ENCFF547HWS	ENCBS638AAA	ENCSR000EDT	BHLHE40-human	EFO:0001187	HepG2	immortalized cell line	Homo sampiens
ENCFF256CVD	ENCBS638AAA	ENCSR000EDT	BHLHE40-human	EFO:0001187	HepG2	immortalized cell line	Homo sampiens
ENCFF000PFM	ENCBS114ENC	ENCSR000BID	BHLHE40-human	EFO:0001187	HepG2	immortalized cell line	Homo sampiens
ENCFF000PFP	ENCBS114ENC	ENCSR000BID	BHLHE40-human	EFO:0001187	HepG2	immortalized cell line	Homo sampiens
ENCFF529FSM	ENCBS114ENC	ENCSR000BID	BHLHE40-human	EFO:0001187	HepG2	immortalized cell line	Homo sampiens
ENCFF498PCU	ENCBS114ENC	ENCSR000BID	BHLHE40-human	EFO:0001187	HepG2	immortalized cell line	Homo sampiens
ENCFF431VZN	ENCBS339VHO	ENCSR987MTA	BHLHE40-human	EFO:0002784	GM12878	immortalized cell line	Homo sampiens
ENCFF720VMA	ENCBS436SAI	ENCSR987MTA	BHLHE40-human	EFO:0002784	GM12878	immortalized cell line	Homo sampiens
ENCFF000VSB	ENCBS630AAA	ENCSR000DZJ	BHLHE40-human	EFO:0002784	GM12878	immortalized cell line	Homo sampiens
ENCFF000VSI	ENCBS630AAA	ENCSR000DZJ	BHLHE40-human	EFO:0002784	GM12878	immortalized cell line	Homo sampiens
ENCFF554EGF	ENCBS276VDW	ENCSR789GVU	BHLHE40-human	EFO:0001184	HEK293T	immortalized cell line	Homo sampiens
ENCFF095FXN	ENCBS323RYE	ENCSR789GVU	BHLHE40-human	EFO:0001184	HEK293T	immortalized cell line	Homo sampiens
ENCFF000YGC	ENCBS039ENC	ENCSR000EGV	BHLHE40-human	EFO:0002067	K562	immortalized cell line	Homo sampiens
ENCFF000YGE	ENCBS039ENC	ENCSR000EGV	BHLHE40-human	EFO:0002067	K562	immortalized cell line	Homo sampiens
ENCFF106IJG	ENCBS039ENC	ENCSR000EGV	BHLHE40-human	EFO:0002067	K562	immortalized cell line	Homo sampiens
ENCFF823NIQ	ENCBS039ENC	ENCSR000EGV	BHLHE40-human	EFO:0002067	K562	immortalized cell line	Homo sampiens
ENCFF860FLL	ENCBS073JZM	ENCSR957KYB	BHLHE40-human	NTR:0004647	IMR-90	primary cell	Homo sampiens
ENCFF908WOK	ENCBS412SDE	ENCSR957KYB	BHLHE40-human	NTR:0004647	IMR-90	primary cell	Homo sampiens
ENCFF355RGO	ENCBS118YJZ	ENCSR782WRO	BMI1-human	EFO:0002067	K562	immortalized cell line	Homo sampiens
ENCFF136XHP	ENCBS489ZOH	ENCSR782WRO	BMI1-human	EFO:0002067	K562	immortalized cell line	Homo sampiens
ENCFF815FYD	ENCBS436SAI	ENCSR469WII	BMI1-human	EFO:0002784	GM12878	immortalized cell line	Homo sampiens
ENCFF481IFQ	ENCBS607NAA	ENCSR469WII	BMI1-human	EFO:0002784	GM12878	immortalized cell line	Homo sampiens
ENCFF000XAH	ENCBS637AAA	ENCSR000EDB	BRCA1-human	EFO:0002791	HeLa-S3	immortalized cell line	Homo sampiens
ENCFF000XAI	ENCBS637AAA	ENCSR000EDB	BRCA1-human	EFO:0002791	HeLa-S3	immortalized cell line	Homo sampiens
ENCFF000WQQ	ENCBS854AAA	ENCSR000EBX	BRCA1-human	EFO:0003042	H1-hESC	stem cell	Homo sampiens
ENCFF000WQS	ENCBS854AAA	ENCSR000EBX	BRCA1-human	EFO:0003042	H1-hESC	stem cell	Homo sampiens
ENCFF340SPV	ENCBS854AAA	ENCSR000EBX	BRCA1-human	EFO:0003042	H1-hESC	stem cell	Homo sampiens
ENCFF932MOL	ENCBS854AAA	ENCSR000EBX	BRCA1-human	EFO:0003042	H1-hESC	stem cell	Homo sampiens
ENCFF000XPF	ENCBS638AAA	ENCSR000EDY	BRCA1-human	EFO:0001187	HepG2	immortalized cell line	Homo sampiens
ENCFF000XPH	ENCBS638AAA	ENCSR000EDY	BRCA1-human	EFO:0001187	HepG2	immortalized cell line	Homo sampiens
ENCFF100HQM	ENCBS638AAA	ENCSR000EDY	BRCA1-human	EFO:0001187	HepG2	immortalized cell line	Homo sampiens
ENCFF244KNV	ENCBS638AAA	ENCSR000EDY	BRCA1-human	EFO:0001187	HepG2	immortalized cell line	Homo sampiens
ENCFF000VSJ	ENCBS630AAA	ENCSR000DZS	BRCA1-human	EFO:0002784	GM12878	immortalized cell line	Homo sampiens
ENCFF000VSK	ENCBS630AAA	ENCSR000DZS	BRCA1-human	EFO:0002784	GM12878	immortalized cell line	Homo sampiens
ENCFF884ZQK	ENCBS849HZG	ENCSR815RMQ	BRD4-human	EFO:0003042	H1-hESC	stem cell	Homo sampiens
ENCFF582TYP	ENCBS952IPA	ENCSR815RMQ	BRD4-human	EFO:0003042	H1-hESC	stem cell	Homo sampiens
ENCFF153CXX	ENCBS658RMI	ENCSR583ACG	BRD4-human	EFO:0002067	K562	immortalized cell line	Homo sampiens
ENCFF207FFX	ENCBS984VNR	ENCSR583ACG	BRD4-human	EFO:0002067	K562	immortalized cell line	Homo sampiens
ENCFF162YLU	ENCBS658RMI	ENCSR583ACG	BRD4-human	EFO:0002067	K562	immortalized cell line	Homo sampiens
ENCFF000YGK	ENCBS039ENC	ENCSR000DOJ	BRF1-human	EFO:0002067	K562	immortalized cell line	Homo sampiens
ENCFF000YGL	ENCBS039ENC	ENCSR000DOJ	BRF1-human	EFO:0002067	K562	immortalized cell line	Homo sampiens
ENCFF000YGM	ENCBS039ENC	ENCSR000DOJ	BRF1-human	EFO:0002067	K562	immortalized cell line	Homo sampiens
ENCFF000XAN	ENCBS637AAA	ENCSR000DNW	BRF1-human	EFO:0002791	HeLa-S3	immortalized cell line	Homo sampiens
ENCFF000XAO	ENCBS637AAA	ENCSR000DNW	BRF1-human	EFO:0002791	HeLa-S3	immortalized cell line	Homo sampiens
ENCFF000XAX	ENCBS637AAA	ENCSR000DNV	BRF2-human	EFO:0002791	HeLa-S3	immortalized cell line	Homo sampiens
ENCFF000XAY	ENCBS637AAA	ENCSR000DNV	BRF2-human	EFO:0002791	HeLa-S3	immortalized cell line	Homo sampiens
ENCFF000YGT	ENCBS039ENC	ENCSR000DOC	BRF2-human	EFO:0002067	K562	immortalized cell line	Homo sampiens
ENCFF000YGU	ENCBS039ENC	ENCSR000DOC	BRF2-human	EFO:0002067	K562	immortalized cell line	Homo sampiens
ENCFF000YGV	ENCBS039ENC	ENCSR000DOC	BRF2-human	EFO:0002067	K562	immortalized cell line	Homo sampiens
ENCFF163ARJ	ENCBS906KIP	ENCSR350XWY	C11orf30-human	EFO:0002067	K562	immortalized cell line	Homo sampiens
ENCFF290MFM	ENCBS320BUL	ENCSR350XWY	C11orf30-human	EFO:0002067	K562	immortalized cell line	Homo sampiens
ENCFF748DIW	ENCBS232JAP	ENCSR860UHK	CBFB-human	EFO:0002784	GM12878	immortalized cell line	Homo sampiens
ENCFF328CQA	ENCBS083XJQ	ENCSR860UHK	CBFB-human	EFO:0002784	GM12878	immortalized cell line	Homo sampiens
ENCFF713QBG	ENCBS316CKF	ENCSR948QLZ	CBX1-human	EFO:0002067	K562	immortalized cell line	Homo sampiens
ENCFF493UYW		ENCSR948QLZ	CBX1-human	EFO:0002067	K562	immortalized cell line	Homo sampiens
ENCFF483JAH	ENCBS684ULB	ENCSR819WZE	CBX1-human	EFO:0001187	HepG2	immortalized cell line	Homo sampiens
ENCFF777NDR	ENCBS614CMA	ENCSR819WZE	CBX1-human	EFO:0001187	HepG2	immortalized cell line	Homo sampiens
ENCFF573RUL	ENCBS117POP	ENCSR469WAO	CBX2-human	EFO:0001086	A549	immortalized cell line	Homo sampiens
ENCFF553BBH	ENCBS998UBJ	ENCSR469WAO	CBX2-human	EFO:0001086	A549	immortalized cell line	Homo sampiens
ENCFF000BUY	ENCBS674MPN	ENCSR000ATU	CBX2-human	EFO:0002067	K562	immortalized cell line	Homo sampiens
ENCFF346CUZ	ENCBS674MPN	ENCSR000ATU	CBX2-human	EFO:0002067	K562	immortalized cell line	Homo sampiens
ENCFF653CBD	ENCBS284CPV	ENCSR774YGM	CBX2-human	EFO:0003042	H1-hESC	stem cell	Homo sampiens
ENCFF280NOU	ENCBS011NFB	ENCSR774YGM	CBX2-human	EFO:0003042	H1-hESC	stem cell	Homo sampiens
ENCFF566HZF	ENCBS284CPV	ENCSR267YDT	CBX3-human	EFO:0003042	H1-hESC	stem cell	Homo sampiens
ENCFF665GEA	ENCBS011NFB	ENCSR267YDT	CBX3-human	EFO:0003042	H1-hESC	stem cell	Homo sampiens
ENCFF000OXY	ENCBS389ENC	ENCSR000BUH	CBX3-human	EFO:0002824	HCT116	immortalized cell line	Homo sampiens
ENCFF000OYB	ENCBS389ENC	ENCSR000BUH	CBX3-human	EFO:0002824	HCT116	immortalized cell line	Homo sampiens
ENCFF000PWP	ENCBS109ENC	ENCSR000BRT	CBX3-human	EFO:0002067	K562	immortalized cell line	Homo sampiens
ENCFF000PWQ	ENCBS109ENC	ENCSR000BRT	CBX3-human	EFO:0002067	K562	immortalized cell line	Homo sampiens
ENCFF725HAK	ENCBS109ENC	ENCSR000BRT	CBX3-human	EFO:0002067	K562	immortalized cell line	Homo sampiens
ENCFF045NWB	ENCBS109ENC	ENCSR000BRT	CBX3-human	EFO:0002067	K562	immortalized cell line	Homo sampiens
ENCFF613DSA	ENCBS127ZRH	ENCSR549NPZ	CBX3-human	EFO:0002784	GM12878	immortalized cell line	Homo sampiens
ENCFF177HNF	ENCBS830FPU	ENCSR549NPZ	CBX3-human	EFO:0002784	GM12878	immortalized cell line	Homo sampiens
ENCFF000BVF	ENCBS639AAA	ENCSR000ATV	CBX3-human	EFO:0002067	K562	immortalized cell line	Homo sampiens
ENCFF522QLM	ENCBS602AAA	ENCSR272JAT	CBX5-human	EFO:0002067	K562	immortalized cell line	Homo sampiens
ENCFF807KZS	ENCBS316CKF	ENCSR272JAT	CBX5-human	EFO:0002067	K562	immortalized cell line	Homo sampiens
ENCFF629FYM	ENCBS364BFI	ENCSR814KIO	CBX5-human	EFO:0003042	H1-hESC	stem cell	Homo sampiens
ENCFF746UGW	ENCBS284CPV	ENCSR814KIO	CBX5-human	EFO:0003042	H1-hESC	stem cell	Homo sampiens
ENCFF697EBC	ENCBS845TXY	ENCSR372GIN	CBX5-human	EFO:0002784	GM12878	immortalized cell line	Homo sampiens
ENCFF092VSU	ENCBS110ENC	ENCSR372GIN	CBX5-human	EFO:0002784	GM12878	immortalized cell line	Homo sampiens
ENCFF805INP	ENCBS364BFI	ENCSR771SNW	CBX8-human	EFO:0003042	H1-hESC	stem cell	Homo sampiens
ENCFF878IXK	ENCBS284CPV	ENCSR771SNW	CBX8-human	EFO:0003042	H1-hESC	stem cell	Homo sampiens
ENCFF279IZN	ENCBS830FPU	ENCSR265MJJ	CBX8-human	EFO:0002784	GM12878	immortalized cell line	Homo sampiens
ENCFF272LME	ENCBS155GIM	ENCSR265MJJ	CBX8-human	EFO:0002784	GM12878	immortalized cell line	Homo sampiens
ENCFF789JGE	ENCBS117POP	ENCSR616MOB	CBX8-human	EFO:0001086	A549	immortalized cell line	Homo sampiens
ENCFF541NSS	ENCBS998UBJ	ENCSR616MOB	CBX8-human	EFO:0001086	A549	immortalized cell line	Homo sampiens
ENCFF000BVJ	ENCBS674MPN	ENCSR000ATW	CBX8-human	EFO:0002067	K562	immortalized cell line	Homo sampiens
ENCFF000YHG	ENCBS039ENC	ENCSR000DOA	CCNT2-human	EFO:0002067	K562	immortalized cell line	Homo sampiens
ENCFF000YHH	ENCBS039ENC	ENCSR000DOA	CCNT2-human	EFO:0002067	K562	immortalized cell line	Homo sampiens
ENCFF069VLP	ENCBS824PND	ENCSR121PFY	CDC5L-human	EFO:0002067	K562	immortalized cell line	Homo sampiens
ENCFF984NVJ	ENCBS140MLH	ENCSR121PFY	CDC5L-human	EFO:0002067	K562	immortalized cell line	Homo sampiens
ENCFF000PFU	ENCBS114ENC	ENCSR000BQI	CEBPB-human	EFO:0001187	HepG2	immortalized cell line	Homo sampiens
ENCFF000PFX	ENCBS114ENC	ENCSR000BQI	CEBPB-human	EFO:0001187	HepG2	immortalized cell line	Homo sampiens
ENCFF659YOC	ENCBS114ENC	ENCSR000BQI	CEBPB-human	EFO:0001187	HepG2	immortalized cell line	Homo sampiens
ENCFF275GCD	ENCBS114ENC	ENCSR000BQI	CEBPB-human	EFO:0001187	HepG2	immortalized cell line	Homo sampiens
ENCFF000WQY	ENCBS854AAA	ENCSR000EBV	CEBPB-human	EFO:0003042	H1-hESC	stem cell	Homo sampiens
ENCFF000WRA	ENCBS854AAA	ENCSR000EBV	CEBPB-human	EFO:0003042	H1-hESC	stem cell	Homo sampiens
ENCFF377MTQ	ENCBS854AAA	ENCSR000EBV	CEBPB-human	EFO:0003042	H1-hESC	stem cell	Homo sampiens
ENCFF947LYW	ENCBS854AAA	ENCSR000EBV	CEBPB-human	EFO:0003042	H1-hESC	stem cell	Homo sampiens
ENCFF000YBJ	ENCBS379ENC	ENCSR000EFM	CEBPB-human	NTR:0004647	IMR-90	primary cell	Homo sampiens
ENCFF000YBM	ENCBS379ENC	ENCSR000EFM	CEBPB-human	NTR:0004647	IMR-90	primary cell	Homo sampiens
ENCFF952RZS	ENCBS379ENC	ENCSR000EFM	CEBPB-human	NTR:0004647	IMR-90	primary cell	Homo sampiens
ENCFF576ZHG	ENCBS379ENC	ENCSR000EFM	CEBPB-human	NTR:0004647	IMR-90	primary cell	Homo sampiens
ENCFF000NJV	ENCBS034DOC	ENCSR000BTT	CEBPB-human	EFO:0005718	Ishikawa	immortalized cell line	Homo sampiens
ENCFF000NJW	ENCBS034DOC	ENCSR000BTT	CEBPB-human	EFO:0005718	Ishikawa	immortalized cell line	Homo sampiens
ENCFF000NTO	ENCBS110ENC	ENCSR000BRX	CEBPB-human	EFO:0002784	GM12878	immortalized cell line	Homo sampiens
ENCFF000NTR	ENCBS110ENC	ENCSR000BRX	CEBPB-human	EFO:0002784	GM12878	immortalized cell line	Homo sampiens
ENCFF701NYT	ENCBS110ENC	ENCSR000BRX	CEBPB-human	EFO:0002784	GM12878	immortalized cell line	Homo sampiens
ENCFF596KMX	ENCBS110ENC	ENCSR000BRX	CEBPB-human	EFO:0002784	GM12878	immortalized cell line	Homo sampiens
ENCFF000OYF	ENCBS389ENC	ENCSR000BSD	CEBPB-human	EFO:0002824	HCT116	immortalized cell line	Homo sampiens
ENCFF000OYK	ENCBS389ENC	ENCSR000BSD	CEBPB-human	EFO:0002824	HCT116	immortalized cell line	Homo sampiens
ENCFF573GQJ	ENCBS608PGT	ENCSR681NOM	CEBPB-human	EFO:0002784	GM12878	immortalized cell line	Homo sampiens
ENCFF707LIB	ENCBS595CWJ	ENCSR681NOM	CEBPB-human	EFO:0002784	GM12878	immortalized cell line	Homo sampiens
ENCFF000YHT	ENCBS039ENC	ENCSR000EHE	CEBPB-human	EFO:0002067	K562	immortalized cell line	Homo sampiens
ENCFF000YHU	ENCBS039ENC	ENCSR000EHE	CEBPB-human	EFO:0002067	K562	immortalized cell line	Homo sampiens
ENCFF353LOM	ENCBS039ENC	ENCSR000EHE	CEBPB-human	EFO:0002067	K562	immortalized cell line	Homo sampiens
ENCFF059XPJ	ENCBS039ENC	ENCSR000EHE	CEBPB-human	EFO:0002067	K562	immortalized cell line	Homo sampiens
ENCFF000VOJ	ENCBS159AAA	ENCSR000DYI	CEBPB-human	EFO:0001086	A549	immortalized cell line	Homo sampiens
ENCFF000VOO	ENCBS159AAA	ENCSR000DYI	CEBPB-human	EFO:0001086	A549	immortalized cell line	Homo sampiens
ENCFF940YYO	ENCBS159AAA	ENCSR000DYI	CEBPB-human	EFO:0001086	A549	immortalized cell line	Homo sampiens
ENCFF644WIF	ENCBS159AAA	ENCSR000DYI	CEBPB-human	EFO:0001086	A549	immortalized cell line	Homo sampiens
ENCFF000XPQ	ENCBS638AAA	ENCSR000EEE	CEBPB-human	EFO:0001187	HepG2	immortalized cell line	Homo sampiens
ENCFF000XPU	ENCBS638AAA	ENCSR000EEE	CEBPB-human	EFO:0001187	HepG2	immortalized cell line	Homo sampiens
ENCFF867DTO	ENCBS638AAA	ENCSR000EEE	CEBPB-human	EFO:0001187	HepG2	immortalized cell line	Homo sampiens
ENCFF355LJR	ENCBS638AAA	ENCSR000EEE	CEBPB-human	EFO:0001187	HepG2	immortalized cell line	Homo sampiens
ENCFF000XBG	ENCBS637AAA	ENCSR000EDA	CEBPB-human	EFO:0002791	HeLa-S3	immortalized cell line	Homo sampiens
ENCFF000XBH	ENCBS637AAA	ENCSR000EDA	CEBPB-human	EFO:0002791	HeLa-S3	immortalized cell line	Homo sampiens
ENCFF000XPM	ENCBS848AAA	ENCSR000EEX	CEBPB-human	EFO:0001187	HepG2	immortalized cell line	Homo sampiens
ENCFF000XPN	ENCBS848AAA	ENCSR000EEX	CEBPB-human	EFO:0001187	HepG2	immortalized cell line	Homo sampiens
ENCFF000QKZ	ENCBS056AAA	ENCSR000BSR	CEBPB-human	EFO:0001203	MCF-7	immortalized cell line	Homo sampiens
ENCFF000QLD	ENCBS056AAA	ENCSR000BSR	CEBPB-human	EFO:0001203	MCF-7	immortalized cell line	Homo sampiens
ENCFF000MWW	ENCBS164AAA	ENCSR000BUB	CEBPB-human	EFO:0001086	A549	immortalized cell line	Homo sampiens
ENCFF000MWY	ENCBS164AAA	ENCSR000BUB	CEBPB-human	EFO:0001086	A549	immortalized cell line	Homo sampiens
ENCFF000PWT	ENCBS109ENC	ENCSR000BRQ	CEBPB-human	EFO:0002067	K562	immortalized cell line	Homo sampiens
ENCFF000PWU	ENCBS109ENC	ENCSR000BRQ	CEBPB-human	EFO:0002067	K562	immortalized cell line	Homo sampiens
ENCFF505XKZ	ENCBS109ENC	ENCSR000BRQ	CEBPB-human	EFO:0002067	K562	immortalized cell line	Homo sampiens
ENCFF935XJG	ENCBS109ENC	ENCSR000BRQ	CEBPB-human	EFO:0002067	K562	immortalized cell line	Homo sampiens
ENCFF000PGC	ENCBS114ENC	ENCSR000BQJ	CEBPD-human	EFO:0001187	HepG2	immortalized cell line	Homo sampiens
ENCFF000PGF	ENCBS114ENC	ENCSR000BQJ	CEBPD-human	EFO:0001187	HepG2	immortalized cell line	Homo sampiens
ENCFF340OXJ	ENCBS114ENC	ENCSR000BQJ	CEBPD-human	EFO:0001187	HepG2	immortalized cell line	Homo sampiens
ENCFF286JPQ	ENCBS114ENC	ENCSR000BQJ	CEBPD-human	EFO:0001187	HepG2	immortalized cell line	Homo sampiens
ENCFF000PXF	ENCBS109ENC	ENCSR000BVY	CEBPD-human	EFO:0002067	K562	immortalized cell line	Homo sampiens
ENCFF000PXJ	ENCBS109ENC	ENCSR000BVY	CEBPD-human	EFO:0002067	K562	immortalized cell line	Homo sampiens
ENCFF634ELX	ENCBS595CWJ	ENCSR347NOB	CEBPZ-human	EFO:0002784	GM12878	immortalized cell line	Homo sampiens
ENCFF464GJM	ENCBS176TMN	ENCSR347NOB	CEBPZ-human	EFO:0002784	GM12878	immortalized cell line	Homo sampiens
ENCFF707DVP	ENCBS720UTF	ENCSR618GDK	CEBPZ-human	EFO:0002067	K562	immortalized cell line	Homo sampiens
ENCFF729TUK	ENCBS983KMD	ENCSR618GDK	CEBPZ-human	EFO:0002067	K562	immortalized cell line	Homo sampiens
ENCFF000XPX	ENCBS638AAA	ENCSR000EDO	CEBPZ-human	EFO:0001187	HepG2	immortalized cell line	Homo sampiens
ENCFF000XQE	ENCBS638AAA	ENCSR000EDO	CEBPZ-human	EFO:0001187	HepG2	immortalized cell line	Homo sampiens
ENCFF560JLB	ENCBS638AAA	ENCSR000EDO	CEBPZ-human	EFO:0001187	HepG2	immortalized cell line	Homo sampiens
ENCFF668MHY	ENCBS638AAA	ENCSR000EDO	CEBPZ-human	EFO:0001187	HepG2	immortalized cell line	Homo sampiens
ENCFF991XPF	ENCBS719UQU	ENCSR065XVO	CHAMP1-human	EFO:0002067	K562	immortalized cell line	Homo sampiens
ENCFF170DKK	ENCBS125ACM	ENCSR065XVO	CHAMP1-human	EFO:0002067	K562	immortalized cell line	Homo sampiens
ENCFF837GFI	ENCBS216AOQ	ENCSR360JOC	CHD1-human	EFO:0001203	MCF-7	immortalized cell line	Homo sampiens
ENCFF239MAH	ENCBS616MBU	ENCSR360JOC	CHD1-human	EFO:0001203	MCF-7	immortalized cell line	Homo sampiens
ENCFF600ZAS	ENCBS529RSF	ENCSR392EAA	CHD1-human	EFO:0002791	HeLa-S3	immortalized cell line	Homo sampiens
ENCFF946ZEF	ENCBS450RLH	ENCSR392EAA	CHD1-human	EFO:0002791	HeLa-S3	immortalized cell line	Homo sampiens
ENCFF000YBS	ENCBS379ENC	ENCSR000EFC	CHD1-human	NTR:0004647	IMR-90	primary cell	Homo sampiens
ENCFF000YBZ	ENCBS379ENC	ENCSR000EFC	CHD1-human	NTR:0004647	IMR-90	primary cell	Homo sampiens
ENCFF767XMC	ENCBS379ENC	ENCSR000EFC	CHD1-human	NTR:0004647	IMR-90	primary cell	Homo sampiens
ENCFF437KCG	ENCBS379ENC	ENCSR000EFC	CHD1-human	NTR:0004647	IMR-90	primary cell	Homo sampiens
ENCFF000AUU	ENCBS380OBH	ENCSR000AQK	CHD1-human	EFO:0003042	H1-hESC	stem cell	Homo sampiens
ENCFF000AUW	ENCBS380OBH	ENCSR000AQK	CHD1-human	EFO:0003042	H1-hESC	stem cell	Homo sampiens
ENCFF382NJA	ENCBS117POP	ENCSR368ZHR	CHD1-human	EFO:0001086	A549	immortalized cell line	Homo sampiens
ENCFF019TJM	ENCBS998UBJ	ENCSR368ZHR	CHD1-human	EFO:0001086	A549	immortalized cell line	Homo sampiens
ENCFF056SZJ	ENCBS830FPU	ENCSR228DTL	CHD1-human	EFO:0002784	GM12878	immortalized cell line	Homo sampiens
ENCFF925WKJ	ENCBS155GIM	ENCSR228DTL	CHD1-human	EFO:0002784	GM12878	immortalized cell line	Homo sampiens
ENCFF000VTE	ENCBS630AAA	ENCSR000DZE	CHD1-human	EFO:0002784	GM12878	immortalized cell line	Homo sampiens
ENCFF000VTQ	ENCBS630AAA	ENCSR000DZE	CHD1-human	EFO:0002784	GM12878	immortalized cell line	Homo sampiens
ENCFF000BVK	ENCBS639AAA	ENCSR000AQD	CHD1-human	EFO:0002067	K562	immortalized cell line	Homo sampiens
ENCFF000BVM	ENCBS639AAA	ENCSR000AQD	CHD1-human	EFO:0002067	K562	immortalized cell line	Homo sampiens
ENCFF160EJO	ENCBS639AAA	ENCSR000AQD	CHD1-human	EFO:0002067	K562	immortalized cell line	Homo sampiens
ENCFF000WRG	ENCBS854AAA	ENCSR000EBU	CHD1-human	EFO:0003042	H1-hESC	stem cell	Homo sampiens
ENCFF000WRH	ENCBS854AAA	ENCSR000EBU	CHD1-human	EFO:0003042	H1-hESC	stem cell	Homo sampiens
ENCFF235NOS	ENCBS854AAA	ENCSR000EBU	CHD1-human	EFO:0003042	H1-hESC	stem cell	Homo sampiens
ENCFF439HHQ	ENCBS854AAA	ENCSR000EBU	CHD1-human	EFO:0003042	H1-hESC	stem cell	Homo sampiens
ENCFF000YIK	ENCBS039ENC	ENCSR000EHD	CHD2-human	EFO:0002067	K562	immortalized cell line	Homo sampiens
ENCFF000YIM	ENCBS039ENC	ENCSR000EHD	CHD2-human	EFO:0002067	K562	immortalized cell line	Homo sampiens
ENCFF505DZG	ENCBS039ENC	ENCSR000EHD	CHD2-human	EFO:0002067	K562	immortalized cell line	Homo sampiens
ENCFF341WTQ	ENCBS039ENC	ENCSR000EHD	CHD2-human	EFO:0002067	K562	immortalized cell line	Homo sampiens
ENCFF000XBT	ENCBS637AAA	ENCSR000ECP	CHD2-human	EFO:0002791	HeLa-S3	immortalized cell line	Homo sampiens
ENCFF000XBW	ENCBS637AAA	ENCSR000ECP	CHD2-human	EFO:0002791	HeLa-S3	immortalized cell line	Homo sampiens
ENCFF000WRV	ENCBS854AAA	ENCSR000EBT	CHD2-human	EFO:0003042	H1-hESC	stem cell	Homo sampiens
ENCFF000WRW	ENCBS854AAA	ENCSR000EBT	CHD2-human	EFO:0003042	H1-hESC	stem cell	Homo sampiens
ENCFF184LBH	ENCBS854AAA	ENCSR000EBT	CHD2-human	EFO:0003042	H1-hESC	stem cell	Homo sampiens
ENCFF390NEA	ENCBS854AAA	ENCSR000EBT	CHD2-human	EFO:0003042	H1-hESC	stem cell	Homo sampiens
ENCFF000VTR	ENCBS630AAA	ENCSR000DZR	CHD2-human	EFO:0002784	GM12878	immortalized cell line	Homo sampiens
ENCFF000VTS	ENCBS630AAA	ENCSR000DZR	CHD2-human	EFO:0002784	GM12878	immortalized cell line	Homo sampiens
ENCFF000XQF	ENCBS638AAA	ENCSR000EED	CHD2-human	EFO:0001187	HepG2	immortalized cell line	Homo sampiens
ENCFF000XQH	ENCBS638AAA	ENCSR000EED	CHD2-human	EFO:0001187	HepG2	immortalized cell line	Homo sampiens
ENCFF669VIL	ENCBS638AAA	ENCSR000EED	CHD2-human	EFO:0001187	HepG2	immortalized cell line	Homo sampiens
ENCFF154IGF	ENCBS638AAA	ENCSR000EED	CHD2-human	EFO:0001187	HepG2	immortalized cell line	Homo sampiens
ENCFF000BVR	ENCBS639AAA	ENCSR000ATL	CHD4-human	EFO:0002067	K562	immortalized cell line	Homo sampiens
ENCFF922RIH	ENCBS117POP	ENCSR550SCU	CHD4-human	EFO:0001086	A549	immortalized cell line	Homo sampiens
ENCFF449GDV	ENCBS998UBJ	ENCSR550SCU	CHD4-human	EFO:0001086	A549	immortalized cell line	Homo sampiens
ENCFF894WEU	ENCBS330WEW	ENCSR751CJG	CHD4-human	EFO:0002784	GM12878	immortalized cell line	Homo sampiens
ENCFF720WGU	ENCBS830FPU	ENCSR751CJG	CHD4-human	EFO:0002784	GM12878	immortalized cell line	Homo sampiens
ENCFF394API	ENCBS117POP	ENCSR817JZD	CHD7-human	EFO:0001086	A549	immortalized cell line	Homo sampiens
ENCFF324ZFJ	ENCBS998UBJ	ENCSR817JZD	CHD7-human	EFO:0001086	A549	immortalized cell line	Homo sampiens
ENCFF491SLS	ENCBS900QPF	ENCSR649WUM	CHD7-human	EFO:0002784	GM12878	immortalized cell line	Homo sampiens
ENCFF354TEM	ENCBS330WEW	ENCSR649WUM	CHD7-human	EFO:0002784	GM12878	immortalized cell line	Homo sampiens
ENCFF000AUY	ENCBS380OBH	ENCSR000AVA	CHD7-human	EFO:0003042	H1-hESC	stem cell	Homo sampiens
ENCFF260SFQ	ENCBS011NFB	ENCSR000AVA	CHD7-human	EFO:0003042	H1-hESC	stem cell	Homo sampiens
ENCFF290WMD	ENCBS380OBH	ENCSR000AVA	CHD7-human	EFO:0003042	H1-hESC	stem cell	Homo sampiens
ENCFF000BVV	ENCBS639AAA	ENCSR000AVD	CHD7-human	EFO:0002067	K562	immortalized cell line	Homo sampiens
ENCFF402MIS	ENCBS639AAA	ENCSR000AVD	CHD7-human	EFO:0002067	K562	immortalized cell line	Homo sampiens
ENCFF494NSZ	ENCBS538DYC	ENCSR130HEG	COPS2-human	EFO:0002067	K562	immortalized cell line	Homo sampiens
ENCFF327GHK	ENCBS357NWO	ENCSR130HEG	COPS2-human	EFO:0002067	K562	immortalized cell line	Homo sampiens
ENCFF000MXE	ENCBS423ENC	ENCSR000BRA	CREB1-human	EFO:0001086	A549	immortalized cell line	Homo sampiens
ENCFF000NTW	ENCBS110ENC	ENCSR000BUF	CREB1-human	EFO:0002784	GM12878	immortalized cell line	Homo sampiens
ENCFF000NTZ	ENCBS110ENC	ENCSR000BUF	CREB1-human	EFO:0002784	GM12878	immortalized cell line	Homo sampiens
ENCFF000NKC	ENCBS034DOC	ENCSR000BUR	CREB1-human	EFO:0005718	Ishikawa	immortalized cell line	Homo sampiens
ENCFF000NKD	ENCBS034DOC	ENCSR000BUR	CREB1-human	EFO:0005718	Ishikawa	immortalized cell line	Homo sampiens
ENCFF000ONE	ENCBS111ENC	ENCSR000BSN	CREB1-human	EFO:0003042	H1-hESC	stem cell	Homo sampiens
ENCFF000ONF	ENCBS111ENC	ENCSR000BSN	CREB1-human	EFO:0003042	H1-hESC	stem cell	Homo sampiens
ENCFF000PGN	ENCBS114ENC	ENCSR000BVL	CREB1-human	EFO:0001187	HepG2	immortalized cell line	Homo sampiens
ENCFF000PGO	ENCBS114ENC	ENCSR000BVL	CREB1-human	EFO:0001187	HepG2	immortalized cell line	Homo sampiens
ENCFF000MXP	ENCBS423ENC	ENCSR000BRC	CREB1-human	EFO:0001086	A549	immortalized cell line	Homo sampiens
ENCFF000PXN	ENCBS109ENC	ENCSR000BSO	CREB1-human	EFO:0002067	K562	immortalized cell line	Homo sampiens
ENCFF000PXO	ENCBS109ENC	ENCSR000BSO	CREB1-human	EFO:0002067	K562	immortalized cell line	Homo sampiens
ENCFF000MXG	ENCBS165AAA	ENCSR000BRB	CREB1-human	EFO:0001086	A549	immortalized cell line	Homo sampiens
ENCFF000MXM	ENCBS165AAA	ENCSR000BRB	CREB1-human	EFO:0001086	A549	immortalized cell line	Homo sampiens
ENCFF328EYC	ENCBS165AAA	ENCSR000BRB	CREB1-human	EFO:0001086	A549	immortalized cell line	Homo sampiens
ENCFF114SKS	ENCBS165AAA	ENCSR000BRB	CREB1-human	EFO:0001086	A549	immortalized cell line	Homo sampiens
ENCFF874XYT	ENCBS488MMM	ENCSR897JAS	CREB1-human	EFO:0001203	MCF-7	immortalized cell line	Homo sampiens
ENCFF006NUZ	ENCBS670IYV	ENCSR897JAS	CREB1-human	EFO:0001203	MCF-7	immortalized cell line	Homo sampiens
ENCFF950GGY	ENCBS048GNZ	ENCSR109YGM	CREB3L1-human	EFO:0002067	K562	immortalized cell line	Homo sampiens
ENCFF274ZBZ	ENCBS839CNN	ENCSR109YGM	CREB3L1-human	EFO:0002067	K562	immortalized cell line	Homo sampiens
ENCFF000BUV	ENCBS639AAA	ENCSR000ATT	CREBBP-human	EFO:0002067	K562	immortalized cell line	Homo sampiens
ENCFF500GPO	ENCBS845TXY	ENCSR839XZU	CREM-human	EFO:0002784	GM12878	immortalized cell line	Homo sampiens
ENCFF517YSM	ENCBS460NBS	ENCSR839XZU	CREM-human	EFO:0002784	GM12878	immortalized cell line	Homo sampiens
ENCFF115VTJ	ENCBS316CKF	ENCSR077DKV	CREM-human	EFO:0002067	K562	immortalized cell line	Homo sampiens
ENCFF131HAH	ENCBS602AAA	ENCSR077DKV	CREM-human	EFO:0002067	K562	immortalized cell line	Homo sampiens
ENCFF289GAC	ENCBS684ULB	ENCSR903ELW	CREM-human	EFO:0001187	HepG2	immortalized cell line	Homo sampiens
ENCFF322CDL	ENCBS515IJA	ENCSR903ELW	CREM-human	EFO:0001187	HepG2	immortalized cell line	Homo sampiens
ENCFF046AZQ	ENCBS719UQU	ENCSR626QJQ	CSDE1-human	EFO:0002067	K562	immortalized cell line	Homo sampiens
ENCFF146VMQ	ENCBS344LIE	ENCSR626QJQ	CSDE1-human	EFO:0002067	K562	immortalized cell line	Homo sampiens
ENCFF058URJ	ENCBS101QRF	ENCSR402XII	CSDE1-human	EFO:0002067	K562	immortalized cell line	Homo sampiens
ENCFF497KAC	ENCBS520IYS	ENCSR402XII	CSDE1-human	EFO:0002067	K562	immortalized cell line	Homo sampiens
ENCFF922YTF	ENCBS276VDW	ENCSR237TFX	CTBP1-human	EFO:0001184	HEK293T	immortalized cell line	Homo sampiens
ENCFF993THI	ENCBS582KZL	ENCSR237TFX	CTBP1-human	EFO:0001184	HEK293T	immortalized cell line	Homo sampiens
ENCFF678DEO	ENCBS547AXB	ENCSR636EYA	CTBP1-human	EFO:0001203	MCF-7	immortalized cell line	Homo sampiens
ENCFF630HPE	ENCBS536NWC	ENCSR636EYA	CTBP1-human	EFO:0001203	MCF-7	immortalized cell line	Homo sampiens
ENCFF427JRM	ENCBS543YEP	ENCSR201NQZ	CTBP1-human	EFO:0002067	K562	immortalized cell line	Homo sampiens
ENCFF648UKL	ENCBS232KKV	ENCSR201NQZ	CTBP1-human	EFO:0002067	K562	immortalized cell line	Homo sampiens
ENCFF098JCC	ENCBS830FPU	ENCSR120IIK	CTBP1-human	EFO:0002784	GM12878	immortalized cell line	Homo sampiens
ENCFF531WRD	ENCBS330WEW	ENCSR120IIK	CTBP1-human	EFO:0002784	GM12878	immortalized cell line	Homo sampiens
ENCFF000WSJ	ENCBS668AAA	ENCSR000EUO	CTBP2-human	EFO:0003042	H1-hESC	stem cell	Homo sampiens
ENCFF000WSL	ENCBS668AAA	ENCSR000EUO	CTBP2-human	EFO:0003042	H1-hESC	stem cell	Homo sampiens
ENCFF001GYI	ENCBS098SOQ	ENCSR000DPY	CTCF-human	CL:0002547	Fibroblast of the aortic adventitia	primary cell	Homo sampiens
ENCFF001GYJ	ENCBS403VCX	ENCSR000DPY	CTCF-human	CL:0002547	Fibroblast of the aortic adventitia	primary cell	Homo sampiens
ENCFF772BCU	ENCBS098SOQ	ENCSR000DPY	CTCF-human	CL:0002547	Fibroblast of the aortic adventitia	primary cell	Homo sampiens
ENCFF281JOP	ENCBS403VCX	ENCSR000DPY	CTCF-human	CL:0002547	Fibroblast of the aortic adventitia	primary cell	Homo sampiens
ENCFF847NEY	ENCBS799DMW	ENCSR307PFP	CTCF-human	UBERON:0001150	Body of pancreas	tissue	Homo sampiens
ENCFF000NKL	ENCBS312UTV	ENCSR000BQE	CTCF-human	EFO:0005718	Ishikawa	immortalized cell line	Homo sampiens
ENCFF000NKO	ENCBS312UTV	ENCSR000BQE	CTCF-human	EFO:0005718	Ishikawa	immortalized cell line	Homo sampiens
ENCFF477SJG	ENCBS312UTV	ENCSR000BQE	CTCF-human	EFO:0005718	Ishikawa	immortalized cell line	Homo sampiens
ENCFF100KVY	ENCBS312UTV	ENCSR000BQE	CTCF-human	EFO:0005718	Ishikawa	immortalized cell line	Homo sampiens
ENCFF001HTS	ENCBS748WRO	ENCSR000DWH	CTCF-human	EFO:0001203	MCF-7	immortalized cell line	Homo sampiens
ENCFF001HTX	ENCBS661RDG	ENCSR000DWH	CTCF-human	EFO:0001203	MCF-7	immortalized cell line	Homo sampiens
ENCFF307AYT	ENCBS661RDG	ENCSR000DWH	CTCF-human	EFO:0001203	MCF-7	immortalized cell line	Homo sampiens
ENCFF860VSM	ENCBS748WRO	ENCSR000DWH	CTCF-human	EFO:0001203	MCF-7	immortalized cell line	Homo sampiens
ENCFF000RXG	ENCBS386ENC	ENCSR000DMF	CTCF-human	EFO:0005726	LNCaP clone FGC	immortalized cell line	Homo sampiens
ENCFF000RXH	ENCBS386ENC	ENCSR000DMF	CTCF-human	EFO:0005726	LNCaP clone FGC	immortalized cell line	Homo sampiens
ENCFF999JKD	ENCBS386ENC	ENCSR000DMF	CTCF-human	EFO:0005726	LNCaP clone FGC	immortalized cell line	Homo sampiens
ENCFF776OUN	ENCBS386ENC	ENCSR000DMF	CTCF-human	EFO:0005726	LNCaP clone FGC	immortalized cell line	Homo sampiens
ENCFF000PXS	ENCBS109ENC	ENCSR000BPJ	CTCF-human	EFO:0002067	K562	immortalized cell line	Homo sampiens
ENCFF000PXT	ENCBS109ENC	ENCSR000BPJ	CTCF-human	EFO:0002067	K562	immortalized cell line	Homo sampiens
ENCFF001HRZ	ENCBS404KTX	ENCSR000DVP	CTCF-human	CL:0002618	Endothelial cell of umbilical vein	primary cell	Homo sampiens
ENCFF001HSA	ENCBS834QWR	ENCSR000DVP	CTCF-human	CL:0002618	Endothelial cell of umbilical vein	primary cell	Homo sampiens
ENCFF030QXK	ENCBS404KTX	ENCSR000DVP	CTCF-human	CL:0002618	Endothelial cell of umbilical vein	primary cell	Homo sampiens
ENCFF978UEA	ENCBS834QWR	ENCSR000DVP	CTCF-human	CL:0002618	Endothelial cell of umbilical vein	primary cell	Homo sampiens
ENCFF000RVZ	ENCBS775AAA	ENCSR000DMA	CTCF-human	EFO:0002067	K562	immortalized cell line	Homo sampiens
ENCFF000RWA	ENCBS775AAA	ENCSR000DMA	CTCF-human	EFO:0002067	K562	immortalized cell line	Homo sampiens
ENCFF000RWB	ENCBS775AAA	ENCSR000DMA	CTCF-human	EFO:0002067	K562	immortalized cell line	Homo sampiens
ENCFF000RQP	ENCBS509ENC	ENCSR000DLD	CTCF-human	EFO:0002788	GM19238	immortalized cell line	Homo sampiens
ENCFF000RQQ	ENCBS509ENC	ENCSR000DLD	CTCF-human	EFO:0002788	GM19238	immortalized cell line	Homo sampiens
ENCFF664IEP	ENCBS509ENC	ENCSR000DLD	CTCF-human	EFO:0002788	GM19238	immortalized cell line	Homo sampiens
ENCFF047VUX	ENCBS509ENC	ENCSR000DLD	CTCF-human	EFO:0002788	GM19238	immortalized cell line	Homo sampiens
ENCFF001GZL	ENCBS488ZLU	ENCSR000DQI	CTCF-human	CL:1001608	Foreskin fibroblast	primary cell	Homo sampiens
ENCFF001GZP	ENCBS693PNC	ENCSR000DQI	CTCF-human	CL:1001608	Foreskin fibroblast	primary cell	Homo sampiens
ENCFF767ZGM	ENCBS693PNC	ENCSR000DQI	CTCF-human	CL:1001608	Foreskin fibroblast	primary cell	Homo sampiens
ENCFF217JMI	ENCBS488ZLU	ENCSR000DQI	CTCF-human	CL:1001608	Foreskin fibroblast	primary cell	Homo sampiens
ENCFF001HQA	ENCBS769DLJ	ENCSR000DUX	CTCF-human	CL:0002557	Fibroblast of pulmonary artery	primary cell	Homo sampiens
ENCFF001HQF	ENCBS321AAA	ENCSR000DUX	CTCF-human	CL:0002557	Fibroblast of pulmonary artery	primary cell	Homo sampiens
ENCFF470KVA	ENCBS769DLJ	ENCSR000DUX	CTCF-human	CL:0002557	Fibroblast of pulmonary artery	primary cell	Homo sampiens
ENCFF066DPY	ENCBS321AAA	ENCSR000DUX	CTCF-human	CL:0002557	Fibroblast of pulmonary artery	primary cell	Homo sampiens
ENCFF007DFB	ENCBS207AJN	ENCSR727HME	CTCF-human	UBERON:0004264	Lower leg skin	tissue	Homo sampiens
ENCFF877TJY	ENCBS372UUZ	ENCSR484DDO	CTCF-human	UBERON:0001150	Body of pancreas	tissue	Homo sampiens
ENCFF672HFG	ENCBS119VMU	ENCSR515LRI	CTCF-human	UBERON:0036149	Suprapubic skin	tissue	Homo sampiens
ENCFF127YRH	ENCBS119VMU	ENCSR515LRI	CTCF-human	UBERON:0036149	Suprapubic skin	tissue	Homo sampiens
ENCFF263IJB	ENCBS360EPF	ENCSR558HTE	CTCF-human	UBERON:0001157	Transverse colon	tissue	Homo sampiens
ENCFF852ZIL	ENCBS185KVE	ENCSR206ETG	CTCF-human	UBERON:0004550	Gastroesophageal sphincter	tissue	Homo sampiens
ENCFF344XAW	ENCBS185KVE	ENCSR206ETG	CTCF-human	UBERON:0004550	Gastroesophageal sphincter	tissue	Homo sampiens
ENCFF001HFC	ENCBS216AAA	ENCSR000DRN	CTCF-human	EFO:0001159	GM12872	immortalized cell line	Homo sampiens
ENCFF001HFD	ENCBS265RII	ENCSR000DRN	CTCF-human	EFO:0001159	GM12872	immortalized cell line	Homo sampiens
ENCFF001HFJ	ENCBS883JTO	ENCSR000DRN	CTCF-human	EFO:0001159	GM12872	immortalized cell line	Homo sampiens
ENCFF454LBG	ENCBS216AAA	ENCSR000DRN	CTCF-human	EFO:0001159	GM12872	immortalized cell line	Homo sampiens
ENCFF421TFS	ENCBS265RII	ENCSR000DRN	CTCF-human	EFO:0001159	GM12872	immortalized cell line	Homo sampiens
ENCFF508CDQ	ENCBS883JTO	ENCSR000DRN	CTCF-human	EFO:0001159	GM12872	immortalized cell line	Homo sampiens
ENCFF001HNZ	ENCBS148GEQ	ENCSR000DUH	CTCF-human	CL:1001608	Foreskin fibroblast	primary cell	Homo sampiens
ENCFF565VSK	ENCBS543LVV	ENCSR393CZG	CTCF-human	UBERON:0004550	Gastroesophageal sphincter	tissue	Homo sampiens
ENCFF555IHR	ENCBS662OGM	ENCSR084RDK	CTCF-human	EFO:0002167	DOHH2	immortalized cell line	Homo sampiens
ENCFF596CVC	ENCBS100ZVH	ENCSR084RDK	CTCF-human	EFO:0002167	DOHH2	immortalized cell line	Homo sampiens
ENCFF001HYH	ENCBS606ENC	ENCSR000DYB	CTCF-human	EFO:0001260	WI38	immortalized cell line	Homo sampiens
ENCFF001HYI	ENCBS157XHV	ENCSR000DYB	CTCF-human	EFO:0001260	WI38	immortalized cell line	Homo sampiens
ENCFF236EOM	ENCBS157XHV	ENCSR000DYB	CTCF-human	EFO:0001260	WI38	immortalized cell line	Homo sampiens
ENCFF720CUU	ENCBS606ENC	ENCSR000DYB	CTCF-human	EFO:0001260	WI38	immortalized cell line	Homo sampiens
ENCFF001HNJ	ENCBS680YLF	ENCSR000DUG	CTCF-human	EFO:0001187	HepG2	immortalized cell line	Homo sampiens
ENCFF001HNK	ENCBS645YGY	ENCSR000DUG	CTCF-human	EFO:0001187	HepG2	immortalized cell line	Homo sampiens
ENCFF687OTC	ENCBS680YLF	ENCSR000DUG	CTCF-human	EFO:0001187	HepG2	immortalized cell line	Homo sampiens
ENCFF924MLI	ENCBS645YGY	ENCSR000DUG	CTCF-human	EFO:0001187	HepG2	immortalized cell line	Homo sampiens
ENCFF001HVD	ENCBS672NFZ	ENCSR000DWX	CTCF-human	CL:0000312	Keratinocyte	primary cell	Homo sampiens
ENCFF001HVE	ENCBS501AXW	ENCSR000DWX	CTCF-human	CL:0000312	Keratinocyte	primary cell	Homo sampiens
ENCFF212HFV	ENCBS672NFZ	ENCSR000DWX	CTCF-human	CL:0000312	Keratinocyte	primary cell	Homo sampiens
ENCFF352RLP	ENCBS501AXW	ENCSR000DWX	CTCF-human	CL:0000312	Keratinocyte	primary cell	Homo sampiens
ENCFF001HQS	ENCBS024DYT	ENCSR000DVA	CTCF-human	CL:0002553	Fibroblast of lung	primary cell	Homo sampiens
ENCFF001HQU	ENCBS323AAA	ENCSR000DVA	CTCF-human	CL:0002553	Fibroblast of lung	primary cell	Homo sampiens
ENCFF501JGN	ENCBS024DYT	ENCSR000DVA	CTCF-human	CL:0002553	Fibroblast of lung	primary cell	Homo sampiens
ENCFF162OTW	ENCBS323AAA	ENCSR000DVA	CTCF-human	CL:0002553	Fibroblast of lung	primary cell	Homo sampiens
ENCFF001HOZ	ENCBS341YNW	ENCSR000DUS	CTCF-human	CL:0002327	Mammary epithelial cell	primary cell	Homo sampiens
ENCFF001HPC	ENCBS721SRV	ENCSR000DUS	CTCF-human	CL:0002327	Mammary epithelial cell	primary cell	Homo sampiens
ENCFF427ZOV	ENCBS721SRV	ENCSR000DUS	CTCF-human	CL:0002327	Mammary epithelial cell	primary cell	Homo sampiens
ENCFF268MTM	ENCBS341YNW	ENCSR000DUS	CTCF-human	CL:0002327	Mammary epithelial cell	primary cell	Homo sampiens
ENCFF000BWB	ENCBS639AAA	ENCSR000AKO	CTCF-human	EFO:0002067	K562	immortalized cell line	Homo sampiens
ENCFF000BWC	ENCBS674MPN	ENCSR000AKO	CTCF-human	EFO:0002067	K562	immortalized cell line	Homo sampiens
ENCFF000RRL	ENCBS223AAA	ENCSR000DLG	CTCF-human	EFO:0005352	GM20000	immortalized cell line	Homo sampiens
ENCFF000RRO	ENCBS223AAA	ENCSR000DLG	CTCF-human	EFO:0005352	GM20000	immortalized cell line	Homo sampiens
ENCFF001HJM	ENCBS304AAA	ENCSR000DTA	CTCF-human	CL:2000044	Brain microvascular endothelial cell	primary cell	Homo sampiens
ENCFF001HJN	ENCBS729HUF	ENCSR000DTA	CTCF-human	CL:2000044	Brain microvascular endothelial cell	primary cell	Homo sampiens
ENCFF778CXN	ENCBS729HUF	ENCSR000DTA	CTCF-human	CL:2000044	Brain microvascular endothelial cell	primary cell	Homo sampiens
ENCFF217JIP	ENCBS304AAA	ENCSR000DTA	CTCF-human	CL:2000044	Brain microvascular endothelial cell	primary cell	Homo sampiens
ENCFF001HET	ENCBS215AAA	ENCSR000DRL	CTCF-human	EFO:0005344	GM12871	immortalized cell line	Homo sampiens
ENCFF001HEV	ENCBS723JLA	ENCSR000DRL	CTCF-human	EFO:0005344	GM12871	immortalized cell line	Homo sampiens
ENCFF516DQW	ENCBS215AAA	ENCSR000DRL	CTCF-human	EFO:0005344	GM12871	immortalized cell line	Homo sampiens
ENCFF992OLU	ENCBS723JLA	ENCSR000DRL	CTCF-human	EFO:0005344	GM12871	immortalized cell line	Homo sampiens
ENCFF001HEI	ENCBS300LOH	ENCSR000DRK	CTCF-human	EFO:0005343	GM12870	immortalized cell line	Homo sampiens
ENCFF001HEJ	ENCBS214AAA	ENCSR000DRK	CTCF-human	EFO:0005343	GM12870	immortalized cell line	Homo sampiens
ENCFF614QHZ	ENCBS214AAA	ENCSR000DRK	CTCF-human	EFO:0005343	GM12870	immortalized cell line	Homo sampiens
ENCFF536MGH	ENCBS300LOH	ENCSR000DRK	CTCF-human	EFO:0005343	GM12870	immortalized cell line	Homo sampiens
ENCFF001HMJ	ENCBS209KHO	ENCSR000DTW	CTCF-human	EFO:0001182	HEK293	immortalized cell line	Homo sampiens
ENCFF001HMN	ENCBS393ENC	ENCSR000DTW	CTCF-human	EFO:0001182	HEK293	immortalized cell line	Homo sampiens
ENCFF852CZT	ENCBS393ENC	ENCSR000DTW	CTCF-human	EFO:0001182	HEK293	immortalized cell line	Homo sampiens
ENCFF020GGX	ENCBS209KHO	ENCSR000DTW	CTCF-human	EFO:0001182	HEK293	immortalized cell line	Homo sampiens
ENCFF000RZM	ENCBS252AAA	ENCSR000DMV	CTCF-human	EFO:0001203	MCF-7	immortalized cell line	Homo sampiens
ENCFF000RZO	ENCBS252AAA	ENCSR000DMV	CTCF-human	EFO:0001203	MCF-7	immortalized cell line	Homo sampiens
ENCFF470ZFI	ENCBS252AAA	ENCSR000DMV	CTCF-human	EFO:0001203	MCF-7	immortalized cell line	Homo sampiens
ENCFF252RUC	ENCBS252AAA	ENCSR000DMV	CTCF-human	EFO:0001203	MCF-7	immortalized cell line	Homo sampiens
ENCFF000SCZ	ENCBS381ENC	ENCSR000DNG	CTCF-human	EFO:0005909	HGPS cell	immortalized cell line	Homo sampiens
ENCFF000SDA	ENCBS381ENC	ENCSR000DNG	CTCF-human	EFO:0005909	HGPS cell	immortalized cell line	Homo sampiens
ENCFF001HDD	ENCBS211AAA	ENCSR000DRH	CTCF-human	EFO:0005340	GM12867	immortalized cell line	Homo sampiens
ENCFF001HDM	ENCBS795QWU	ENCSR000DRH	CTCF-human	EFO:0005340	GM12867	immortalized cell line	Homo sampiens
ENCFF982RQB	ENCBS211AAA	ENCSR000DRH	CTCF-human	EFO:0005340	GM12867	immortalized cell line	Homo sampiens
ENCFF676TZP	ENCBS795QWU	ENCSR000DRH	CTCF-human	EFO:0005340	GM12867	immortalized cell line	Homo sampiens
ENCFF000QLH	ENCBS001AAA	ENCSR000AHD	CTCF-human	EFO:0001203	MCF-7	immortalized cell line	Homo sampiens
ENCFF000QLK	ENCBS000AAA	ENCSR000AHD	CTCF-human	EFO:0001203	MCF-7	immortalized cell line	Homo sampiens
ENCFF335UKS	ENCBS001AAA	ENCSR000AHD	CTCF-human	EFO:0001203	MCF-7	immortalized cell line	Homo sampiens
ENCFF754DME	ENCBS000AAA	ENCSR000AHD	CTCF-human	EFO:0001203	MCF-7	immortalized cell line	Homo sampiens
ENCFF000SCK	ENCBS611ENC	ENCSR000DNC	CTCF-human	CL:0000312	Keratinocyte	primary cell	Homo sampiens
ENCFF000SCM	ENCBS611ENC	ENCSR000DNC	CTCF-human	CL:0000312	Keratinocyte	primary cell	Homo sampiens
ENCFF000VUC	ENCBS630AAA	ENCSR000DZN	CTCF-human	EFO:0002784	GM12878	immortalized cell line	Homo sampiens
ENCFF000VUE	ENCBS630AAA	ENCSR000DZN	CTCF-human	EFO:0002784	GM12878	immortalized cell line	Homo sampiens
ENCFF000AVI	ENCBS718AAA	ENCSR000AMF	CTCF-human	EFO:0003042	H1-hESC	stem cell	Homo sampiens
ENCFF000AVK	ENCBS718AAA	ENCSR000AMF	CTCF-human	EFO:0003042	H1-hESC	stem cell	Homo sampiens
ENCFF001HDO	ENCBS212AAA	ENCSR000DRI	CTCF-human	EFO:0005341	GM12868	immortalized cell line	Homo sampiens
ENCFF001HDP	ENCBS480ERX	ENCSR000DRI	CTCF-human	EFO:0005341	GM12868	immortalized cell line	Homo sampiens
ENCFF554ZBH	ENCBS212AAA	ENCSR000DRI	CTCF-human	EFO:0005341	GM12868	immortalized cell line	Homo sampiens
ENCFF107LJJ	ENCBS480ERX	ENCSR000DRI	CTCF-human	EFO:0005341	GM12868	immortalized cell line	Homo sampiens
ENCFF001GXP	ENCBS992UXD	ENCSR000DPS	CTCF-human	CL:0002552	Fibroblast of gingiva	primary cell	Homo sampiens
ENCFF001GXR	ENCBS697FJI	ENCSR000DPS	CTCF-human	CL:0002552	Fibroblast of gingiva	primary cell	Homo sampiens
ENCFF263AQI	ENCBS697FJI	ENCSR000DPS	CTCF-human	CL:0002552	Fibroblast of gingiva	primary cell	Homo sampiens
ENCFF812WDD	ENCBS992UXD	ENCSR000DPS	CTCF-human	CL:0002552	Fibroblast of gingiva	primary cell	Homo sampiens
ENCFF001HLX	ENCBS191CHS	ENCSR000DTR	CTCF-human	CL:0002252	Epithelial cell of esophagus	primary cell	Homo sampiens
ENCFF001HMA	ENCBS044KJV	ENCSR000DTR	CTCF-human	CL:0002252	Epithelial cell of esophagus	primary cell	Homo sampiens
ENCFF707NXH	ENCBS191CHS	ENCSR000DTR	CTCF-human	CL:0002252	Epithelial cell of esophagus	primary cell	Homo sampiens
ENCFF999PXI	ENCBS044KJV	ENCSR000DTR	CTCF-human	CL:0002252	Epithelial cell of esophagus	primary cell	Homo sampiens
ENCFF001HQY	ENCBS050EYT	ENCSR000DVH	CTCF-human	CL:0002518	Kidney epithelial cell	primary cell	Homo sampiens
ENCFF001HRF	ENCBS869FDU	ENCSR000DVH	CTCF-human	CL:0002518	Kidney epithelial cell	primary cell	Homo sampiens
ENCFF370MLP	ENCBS050EYT	ENCSR000DVH	CTCF-human	CL:0002518	Kidney epithelial cell	primary cell	Homo sampiens
ENCFF007XGO	ENCBS869FDU	ENCSR000DVH	CTCF-human	CL:0002518	Kidney epithelial cell	primary cell	Homo sampiens
ENCFF000RLW	ENCBS162AAA	ENCSR000DNA	CTCF-human	EFO:0001086	A549	immortalized cell line	Homo sampiens
ENCFF000RLY	ENCBS162AAA	ENCSR000DNA	CTCF-human	EFO:0001086	A549	immortalized cell line	Homo sampiens
ENCFF939MPS	ENCBS162AAA	ENCSR000DNA	CTCF-human	EFO:0001086	A549	immortalized cell line	Homo sampiens
ENCFF021FUK	ENCBS162AAA	ENCSR000DNA	CTCF-human	EFO:0001086	A549	immortalized cell line	Homo sampiens
ENCFF000OYO	ENCBS389ENC	ENCSR000BSE	CTCF-human	EFO:0002824	HCT116	immortalized cell line	Homo sampiens
ENCFF000OYR	ENCBS389ENC	ENCSR000BSE	CTCF-human	EFO:0002824	HCT116	immortalized cell line	Homo sampiens
ENCFF000SDM	ENCBS149AAA	ENCSR000DNI	CTCF-human	UBERON:0002106	Spleen	tissue	Homo sampiens
ENCFF000SDO	ENCBS362AAA	ENCSR000DNI	CTCF-human	UBERON:0002106	Spleen	tissue	Homo sampiens
ENCFF481VJG	ENCBS362AAA	ENCSR000DNI	CTCF-human	UBERON:0002106	Spleen	tissue	Homo sampiens
ENCFF211IRJ	ENCBS149AAA	ENCSR000DNI	CTCF-human	UBERON:0002106	Spleen	tissue	Homo sampiens
ENCFF000RXY	ENCBS351AAA	ENCSR000DMH	CTCF-human	UBERON:0002048	Lung	tissue	Homo sampiens
ENCFF000RXZ	ENCBS139AAA	ENCSR000DMH	CTCF-human	UBERON:0002048	Lung	tissue	Homo sampiens
ENCFF000MYA	ENCBS423ENC	ENCSR000BHW	CTCF-human	EFO:0001086	A549	immortalized cell line	Homo sampiens
ENCFF000MYB	ENCBS423ENC	ENCSR000BHW	CTCF-human	EFO:0001086	A549	immortalized cell line	Homo sampiens
ENCFF977KZE	ENCBS423ENC	ENCSR000BHW	CTCF-human	EFO:0001086	A549	immortalized cell line	Homo sampiens
ENCFF272YDN	ENCBS423ENC	ENCSR000BHW	CTCF-human	EFO:0001086	A549	immortalized cell line	Homo sampiens
ENCFF000VPA	ENCBS159AAA	ENCSR000DYD	CTCF-human	EFO:0001086	A549	immortalized cell line	Homo sampiens
ENCFF000VPO	ENCBS159AAA	ENCSR000DYD	CTCF-human	EFO:0001086	A549	immortalized cell line	Homo sampiens
ENCFF292MAD	ENCBS159AAA	ENCSR000DYD	CTCF-human	EFO:0001086	A549	immortalized cell line	Homo sampiens
ENCFF378FXS	ENCBS159AAA	ENCSR000DYD	CTCF-human	EFO:0001086	A549	immortalized cell line	Homo sampiens
ENCFF001GZV	ENCBS530YXL	ENCSR000DQN	CTCF-human	EFO:0001099	Caco-2	immortalized cell line	Homo sampiens
ENCFF001HAC	ENCBS700RKG	ENCSR000DQN	CTCF-human	EFO:0001099	Caco-2	immortalized cell line	Homo sampiens
ENCFF364PXD	ENCBS700RKG	ENCSR000DQN	CTCF-human	EFO:0001099	Caco-2	immortalized cell line	Homo sampiens
ENCFF054SRM	ENCBS530YXL	ENCSR000DQN	CTCF-human	EFO:0001099	Caco-2	immortalized cell line	Homo sampiens
ENCFF000RNV	ENCBS184AAA	ENCSR000DKR	CTCF-human	EFO:0005335	GM10266	immortalized cell line	Homo sampiens
ENCFF000RNX	ENCBS184AAA	ENCSR000DKR	CTCF-human	EFO:0005335	GM10266	immortalized cell line	Homo sampiens
ENCFF000RZZ	ENCBS252AAA	ENCSR000DMO	CTCF-human	EFO:0001203	MCF-7	immortalized cell line	Homo sampiens
ENCFF000SAA	ENCBS252AAA	ENCSR000DMO	CTCF-human	EFO:0001203	MCF-7	immortalized cell line	Homo sampiens
ENCFF468DTD	ENCBS252AAA	ENCSR000DMO	CTCF-human	EFO:0001203	MCF-7	immortalized cell line	Homo sampiens
ENCFF856ODM	ENCBS252AAA	ENCSR000DMO	CTCF-human	EFO:0001203	MCF-7	immortalized cell line	Homo sampiens
ENCFF029BUR	ENCBS746YNW	ENCSR981CID	CTCF-human	UBERON:0000473	Testis	tissue	Homo sampiens
ENCFF471DLO	ENCBS351RRY	ENCSR756KRS	CTCF-human	UBERON:0036149	Suprapubic skin	tissue	Homo sampiens
ENCFF936JKF	ENCBS351RRY	ENCSR756KRS	CTCF-human	UBERON:0036149	Suprapubic skin	tissue	Homo sampiens
ENCFF982YZF	ENCBS108OCK	ENCSR762PCG	CTCF-human	UBERON:0002190	Adipose	tissue	Homo sampiens
ENCFF001HRO	ENCBS420ENC	ENCSR000DVI	CTCF-human	CL:0002586	Retinal pigment epithelial cell	primary cell	Homo sampiens
ENCFF001HRS	ENCBS925NLT	ENCSR000DVI	CTCF-human	CL:0002586	Retinal pigment epithelial cell	primary cell	Homo sampiens
ENCFF919KWN	ENCBS925NLT	ENCSR000DVI	CTCF-human	CL:0002586	Retinal pigment epithelial cell	primary cell	Homo sampiens
ENCFF178SLS	ENCBS420ENC	ENCSR000DVI	CTCF-human	CL:0002586	Retinal pigment epithelial cell	primary cell	Homo sampiens
ENCFF419SAO	ENCBS134OKV	ENCSR038FOS	CTCF-human	UBERON:0036149	Suprapubic skin	tissue	Homo sampiens
ENCFF209DDU	ENCBS424ANS	ENCSR549WAU	CTCF-human	UBERON:0000945	Stomach	tissue	Homo sampiens
ENCFF899IHZ	ENCBS995JJM	ENCSR492ZIW	CTCF-human	UBERON:0002046	Thyroid gland	tissue	Homo sampiens
ENCFF132OWJ	ENCBS077RUJ	ENCSR252QYR	CTCF-human	CL:0000182	Hepatocyte	in vitro differentiated cells	Homo sampiens
ENCFF044VWD	ENCBS520VFV	ENCSR252QYR	CTCF-human	CL:0000182	Hepatocyte	in vitro differentiated cells	Homo sampiens
ENCFF304JLC	ENCBS168BMV	ENCSR434XLP	CTCF-human	UBERON:0001323	Tibial nerve	tissue	Homo sampiens
ENCFF025ZGL	ENCBS944UJX	ENCSR419ANE	CTCF-human	UBERON:0001211	Peyer's patch	tissue	Homo sampiens
ENCFF738KRH	ENCBS106FXL	ENCSR544APK	CTCF-human	UBERON:0002084	Heart left ventricle	tissue	Homo sampiens
ENCFF000SCR	ENCBS355AAA	ENCSR000DND	CTCF-human	UBERON:0001264	Pancreas	tissue	Homo sampiens
ENCFF000SCT	ENCBS143AAA	ENCSR000DND	CTCF-human	UBERON:0001264	Pancreas	tissue	Homo sampiens
ENCFF541AWB	ENCBS971HUW	ENCSR225OKX	CTCF-human	UBERON:0010414	Omental fat pad	tissue	Homo sampiens
ENCFF644OEB	ENCBS688NIO	ENCSR655ECZ	CTCF-human	UBERON:0000996	Vagina	tissue	Homo sampiens
ENCFF000RPO	ENCBS633AAA	ENCSR000DKY	CTCF-human	EFO:0002786	GM12892	immortalized cell line	Homo sampiens
ENCFF000RPP	ENCBS633AAA	ENCSR000DKY	CTCF-human	EFO:0002786	GM12892	immortalized cell line	Homo sampiens
ENCFF000RXI	ENCBS387ENC	ENCSR000DME	CTCF-human	EFO:0005726	LNCaP clone FGC	immortalized cell line	Homo sampiens
ENCFF000RXJ	ENCBS387ENC	ENCSR000DME	CTCF-human	EFO:0005726	LNCaP clone FGC	immortalized cell line	Homo sampiens
ENCFF000RUZ	ENCBS669AAA	ENCSR000DLW	CTCF-human	CL:0002618	Endothelial cell of umbilical vein	primary cell	Homo sampiens
ENCFF000RVC	ENCBS669AAA	ENCSR000DLW	CTCF-human	CL:0002618	Endothelial cell of umbilical vein	primary cell	Homo sampiens
ENCFF000RRE	ENCBS510ENC	ENCSR000DLF	CTCF-human	EFO:0002790	GM19240	immortalized cell line	Homo sampiens
ENCFF000RRG	ENCBS510ENC	ENCSR000DLF	CTCF-human	EFO:0002790	GM19240	immortalized cell line	Homo sampiens
ENCFF001HLO	ENCBS257IHV	ENCSR000DTO	CTCF-human	EFO:0002824	HCT116	immortalized cell line	Homo sampiens
ENCFF001HLP	ENCBS409ENC	ENCSR000DTO	CTCF-human	EFO:0002824	HCT116	immortalized cell line	Homo sampiens
ENCFF322EWR	ENCBS257IHV	ENCSR000DTO	CTCF-human	EFO:0002824	HCT116	immortalized cell line	Homo sampiens
ENCFF289VTR	ENCBS409ENC	ENCSR000DTO	CTCF-human	EFO:0002824	HCT116	immortalized cell line	Homo sampiens
ENCFF001HBJ	ENCBS892LHC	ENCSR000DRB	CTCF-human	EFO:0005337	GM12864	immortalized cell line	Homo sampiens
ENCFF001HBQ	ENCBS315VRM	ENCSR000DRB	CTCF-human	EFO:0005337	GM12864	immortalized cell line	Homo sampiens
ENCFF001HBS	ENCBS605TTN	ENCSR000DRB	CTCF-human	EFO:0005337	GM12864	immortalized cell line	Homo sampiens
ENCFF424VHC	ENCBS315VRM	ENCSR000DRB	CTCF-human	EFO:0005337	GM12864	immortalized cell line	Homo sampiens
ENCFF418PTV	ENCBS892LHC	ENCSR000DRB	CTCF-human	EFO:0005337	GM12864	immortalized cell line	Homo sampiens
ENCFF483LML	ENCBS605TTN	ENCSR000DRB	CTCF-human	EFO:0005337	GM12864	immortalized cell line	Homo sampiens
ENCFF001HOF	ENCBS411AMC	ENCSR000DUM	CTCF-human	NTR:0004646	HFF-Myc	primary cell	Homo sampiens
ENCFF001HOK	ENCBS553ENC	ENCSR000DUM	CTCF-human	NTR:0004646	HFF-Myc	primary cell	Homo sampiens
ENCFF060JAA	ENCBS411AMC	ENCSR000DUM	CTCF-human	NTR:0004646	HFF-Myc	primary cell	Homo sampiens
ENCFF580BHF	ENCBS553ENC	ENCSR000DUM	CTCF-human	NTR:0004646	HFF-Myc	primary cell	Homo sampiens
ENCFF001HOV	ENCBS373UEY	ENCSR000DUP	CTCF-human	EFO:0002793	HL-60	immortalized cell line	Homo sampiens
ENCFF675VOA	ENCBS668EWD	ENCSR071XWO	CTCF-human	UBERON:0011907	Gastrocnemius medialis	tissue	Homo sampiens
ENCFF001HSM	ENCBS499HFO	ENCSR000DVQ	CTCF-human	CL:0002558	Fibroblast of villous mesenchyme	primary cell	Homo sampiens
ENCFF001HSO	ENCBS677ASF	ENCSR000DVQ	CTCF-human	CL:0002558	Fibroblast of villous mesenchyme	primary cell	Homo sampiens
ENCFF976BRM	ENCBS677ASF	ENCSR000DVQ	CTCF-human	CL:0002558	Fibroblast of villous mesenchyme	primary cell	Homo sampiens
ENCFF569PMD	ENCBS499HFO	ENCSR000DVQ	CTCF-human	CL:0002558	Fibroblast of villous mesenchyme	primary cell	Homo sampiens
ENCFF001HUP	ENCBS748WVA	ENCSR000DWQ	CTCF-human	CL:1001608	Foreskin fibroblast	primary cell	Homo sampiens
ENCFF001HUQ	ENCBS271PJP	ENCSR000DWQ	CTCF-human	CL:1001608	Foreskin fibroblast	primary cell	Homo sampiens
ENCFF987CLO	ENCBS748WVA	ENCSR000DWQ	CTCF-human	CL:1001608	Foreskin fibroblast	primary cell	Homo sampiens
ENCFF568DKF	ENCBS271PJP	ENCSR000DWQ	CTCF-human	CL:1001608	Foreskin fibroblast	primary cell	Homo sampiens
ENCFF001HKJ	ENCBS887NMD	ENCSR000DTI	CTCF-human	CL:0000746	Cardiac muscle cell	primary cell	Homo sampiens
ENCFF001HKP	ENCBS465QGC	ENCSR000DTI	CTCF-human	CL:0000746	Cardiac muscle cell	primary cell	Homo sampiens
ENCFF599WUT	ENCBS887NMD	ENCSR000DTI	CTCF-human	CL:0000746	Cardiac muscle cell	primary cell	Homo sampiens
ENCFF650OIZ	ENCBS465QGC	ENCSR000DTI	CTCF-human	CL:0000746	Cardiac muscle cell	primary cell	Homo sampiens
ENCFF000AMI	ENCBS400ARI	ENCSR000AUV	CTCF-human	CL:0000236	B cell	primary cell	Homo sampiens
ENCFF000AMJ	ENCBS836CYW	ENCSR000AUV	CTCF-human	CL:0000236	B cell	primary cell	Homo sampiens
ENCFF000AML	ENCBS098ETX	ENCSR000AUV	CTCF-human	CL:0000236	B cell	primary cell	Homo sampiens
ENCFF400CEE	ENCBS098ETX	ENCSR000AUV	CTCF-human	CL:0000236	B cell	primary cell	Homo sampiens
ENCFF157DVB	ENCBS400ARI	ENCSR000AUV	CTCF-human	CL:0000236	B cell	primary cell	Homo sampiens
ENCFF520GVQ	ENCBS836CYW	ENCSR000AUV	CTCF-human	CL:0000236	B cell	primary cell	Homo sampiens
ENCFF681HSJ	ENCBS850UIV	ENCSR113REG	CTCF-human	EFO:0005719	Karpas-422	immortalized cell line	Homo sampiens
ENCFF398ZFZ	ENCBS171YVY	ENCSR113REG	CTCF-human	EFO:0005719	Karpas-422	immortalized cell line	Homo sampiens
ENCFF204YUH	ENCBS996THA	ENCSR005LPI	CTCF-human	UBERON:0010414	Omental fat pad	tissue	Homo sampiens
ENCFF773QXS	ENCBS439RNG	ENCSR430TEE	CTCF-human	UBERON:0004264	Lower leg skin	tissue	Homo sampiens
ENCFF000RFA	ENCBS404ENC	ENCSR000BLX	CTCF-human	EFO:0003072	SK-N-SH	immortalized cell line	Homo sampiens
ENCFF000RFD	ENCBS404ENC	ENCSR000BLX	CTCF-human	EFO:0003072	SK-N-SH	immortalized cell line	Homo sampiens
ENCFF373FVR	ENCBS404ENC	ENCSR000BLX	CTCF-human	EFO:0003072	SK-N-SH	immortalized cell line	Homo sampiens
ENCFF587REM	ENCBS404ENC	ENCSR000BLX	CTCF-human	EFO:0003072	SK-N-SH	immortalized cell line	Homo sampiens
ENCFF001HCD	ENCBS159QLB	ENCSR000DRE	CTCF-human	EFO:0005338	GM12865	immortalized cell line	Homo sampiens
ENCFF001HCE	ENCBS356ARP	ENCSR000DRE	CTCF-human	EFO:0005338	GM12865	immortalized cell line	Homo sampiens
ENCFF001HCL	ENCBS239KGS	ENCSR000DRE	CTCF-human	EFO:0005338	GM12865	immortalized cell line	Homo sampiens
ENCFF683FXB	ENCBS159QLB	ENCSR000DRE	CTCF-human	EFO:0005338	GM12865	immortalized cell line	Homo sampiens
ENCFF766ZRA	ENCBS356ARP	ENCSR000DRE	CTCF-human	EFO:0005338	GM12865	immortalized cell line	Homo sampiens
ENCFF515ILZ	ENCBS239KGS	ENCSR000DRE	CTCF-human	EFO:0005338	GM12865	immortalized cell line	Homo sampiens
ENCFF000PGS	ENCBS114ENC	ENCSR000BIE	CTCF-human	EFO:0001187	HepG2	immortalized cell line	Homo sampiens
ENCFF000PGT	ENCBS114ENC	ENCSR000BIE	CTCF-human	EFO:0001187	HepG2	immortalized cell line	Homo sampiens
ENCFF249IWE	ENCBS114ENC	ENCSR000BIE	CTCF-human	EFO:0001187	HepG2	immortalized cell line	Homo sampiens
ENCFF466SFU	ENCBS114ENC	ENCSR000BIE	CTCF-human	EFO:0001187	HepG2	immortalized cell line	Homo sampiens
ENCFF000AHL	ENCBS161AAA	ENCSR000AUF	CTCF-human	EFO:0001086	A549	immortalized cell line	Homo sampiens
ENCFF000AHO	ENCBS161AAA	ENCSR000AUF	CTCF-human	EFO:0001086	A549	immortalized cell line	Homo sampiens
ENCFF001HPN	ENCBS399FWJ	ENCSR000DUU	CTCF-human	CL:0002555	Fibroblast of mammary gland	primary cell	Homo sampiens
ENCFF001HPS	ENCBS311AAA	ENCSR000DUU	CTCF-human	CL:0002555	Fibroblast of mammary gland	primary cell	Homo sampiens
ENCFF318TMO	ENCBS399FWJ	ENCSR000DUU	CTCF-human	CL:0002555	Fibroblast of mammary gland	primary cell	Homo sampiens
ENCFF393HXD	ENCBS311AAA	ENCSR000DUU	CTCF-human	CL:0002555	Fibroblast of mammary gland	primary cell	Homo sampiens
ENCFF000RZQ	ENCBS096ENC	ENCSR000DMS	CTCF-human	EFO:0001203	MCF-7	immortalized cell line	Homo sampiens
ENCFF000RZS	ENCBS096ENC	ENCSR000DMS	CTCF-human	EFO:0001203	MCF-7	immortalized cell line	Homo sampiens
ENCFF248VFM	ENCBS096ENC	ENCSR000DMS	CTCF-human	EFO:0001203	MCF-7	immortalized cell line	Homo sampiens
ENCFF628LRK	ENCBS096ENC	ENCSR000DMS	CTCF-human	EFO:0001203	MCF-7	immortalized cell line	Homo sampiens
ENCFF001HIY	ENCBS302AAA	ENCSR000DSU	CTCF-human	CL:0002606	Astrocyte of the spinal cord	primary cell	Homo sampiens
ENCFF001HIZ	ENCBS995OME	ENCSR000DSU	CTCF-human	CL:0002606	Astrocyte of the spinal cord	primary cell	Homo sampiens
ENCFF644FRD	ENCBS302AAA	ENCSR000DSU	CTCF-human	CL:0002606	Astrocyte of the spinal cord	primary cell	Homo sampiens
ENCFF600BAG	ENCBS995OME	ENCSR000DSU	CTCF-human	CL:0002606	Astrocyte of the spinal cord	primary cell	Homo sampiens
ENCFF001HGZ	ENCBS219AAA	ENCSR000DRU	CTCF-human	EFO:0001162	GM12875	immortalized cell line	Homo sampiens
ENCFF001HHA	ENCBS364XYO	ENCSR000DRU	CTCF-human	EFO:0001162	GM12875	immortalized cell line	Homo sampiens
ENCFF360WOG	ENCBS364XYO	ENCSR000DRU	CTCF-human	EFO:0001162	GM12875	immortalized cell line	Homo sampiens
ENCFF913KQZ	ENCBS219AAA	ENCSR000DRU	CTCF-human	EFO:0001162	GM12875	immortalized cell line	Homo sampiens
ENCFF001HWO	ENCBS768ZLU	ENCSR000DXI	CTCF-human	CL:0002328	Bronchial epithelial cell	primary cell	Homo sampiens
ENCFF001HWP	ENCBS838JFP	ENCSR000DXI	CTCF-human	CL:0002328	Bronchial epithelial cell	primary cell	Homo sampiens
ENCFF902PDL	ENCBS838JFP	ENCSR000DXI	CTCF-human	CL:0002328	Bronchial epithelial cell	primary cell	Homo sampiens
ENCFF863LNN	ENCBS768ZLU	ENCSR000DXI	CTCF-human	CL:0002328	Bronchial epithelial cell	primary cell	Homo sampiens
ENCFF000RSA	ENCBS670AAA	ENCSR000DLK	CTCF-human	EFO:0003042	H1-hESC	stem cell	Homo sampiens
ENCFF827MXQ	ENCBS825KJI	ENCSR699BEK	CTCF-human	UBERON:0007610	Tibial artery	tissue	Homo sampiens
ENCFF365JBZ	ENCBS236MDX	ENCSR697YIN	CTCF-human	UBERON:0008367	Breast epithelium	tissue	Homo sampiens
ENCFF000BGZ	ENCBS091ENC	ENCSR000ALV	CTCF-human	CL:0002327	Mammary epithelial cell	primary cell	Homo sampiens
ENCFF000BHA	ENCBS045GHW	ENCSR000ALV	CTCF-human	CL:0002327	Mammary epithelial cell	primary cell	Homo sampiens
ENCFF939PVE	ENCBS045GHW	ENCSR000ALV	CTCF-human	CL:0002327	Mammary epithelial cell	primary cell	Homo sampiens
ENCFF097ANL	ENCBS091ENC	ENCSR000ALV	CTCF-human	CL:0002327	Mammary epithelial cell	primary cell	Homo sampiens
ENCFF446KCO	ENCBS131UEI	ENCSR744YJR	CTCF-human	UBERON:0002046	Thyroid gland	tissue	Homo sampiens
ENCFF118IIC	ENCBS410KPZ	ENCSR791AYW	CTCF-human	UBERON:0002084	Heart left ventricle	tissue	Homo sampiens
ENCFF840LTU	ENCBS232BOV	ENCSR960MDF	CTCF-human	UBERON:0001496	Ascending aorta	tissue	Homo sampiens
ENCFF096CSL	ENCBS666LQH	ENCSR391ZKN	CTCF-human	UBERON:0001211	Peyer's patch	tissue	Homo sampiens
ENCFF288DHW	ENCBS423TVO	ENCSR964BKO	CTCF-human	UBERON:0008952	Upper lobe of left lung	tissue	Homo sampiens
ENCFF309III	ENCBS689AWK	ENCSR822PJT	CTCF-human	UBERON:0001323	Tibial nerve	tissue	Homo sampiens
ENCFF007JEJ	ENCBS278PSF	ENCSR450FRI	CTCF-human	UBERON:0006920	Esophagus squamous epithelium	tissue	Homo sampiens
ENCFF037HFH	ENCBS201ZAR	ENCSR392SFJ	CTCF-human	UBERON:0000995	Uterus	tissue	Homo sampiens
ENCFF725LQV	ENCBS600YTL	ENCSR548DDS	CTCF-human	UBERON:0000992	Ovary	tissue	Homo sampiens
ENCFF000SBT	ENCBS253AAA	ENCSR000DMY	CTCF-human	EFO:0002939	Medulloblastoma	immortalized cell line	Homo sampiens
ENCFF000SBX	ENCBS253AAA	ENCSR000DMY	CTCF-human	EFO:0002939	Medulloblastoma	immortalized cell line	Homo sampiens
ENCFF364YRB	ENCBS253AAA	ENCSR000DMY	CTCF-human	EFO:0002939	Medulloblastoma	immortalized cell line	Homo sampiens
ENCFF446HAE	ENCBS253AAA	ENCSR000DMY	CTCF-human	EFO:0002939	Medulloblastoma	immortalized cell line	Homo sampiens
ENCFF000MXS	ENCBS165AAA	ENCSR000BHV	CTCF-human	EFO:0001086	A549	immortalized cell line	Homo sampiens
ENCFF000MXY	ENCBS165AAA	ENCSR000BHV	CTCF-human	EFO:0001086	A549	immortalized cell line	Homo sampiens
ENCFF123FZN	ENCBS165AAA	ENCSR000BHV	CTCF-human	EFO:0001086	A549	immortalized cell line	Homo sampiens
ENCFF409SHP	ENCBS165AAA	ENCSR000BHV	CTCF-human	EFO:0001086	A549	immortalized cell line	Homo sampiens
ENCFF259DRG	ENCBS063ABX	ENCSR450BLH	CTCF-human	UBERON:0002369	Adrenal gland	tissue	Homo sampiens
ENCFF000SAG	ENCBS251AAA	ENCSR000DML	CTCF-human	EFO:0001203	MCF-7	immortalized cell line	Homo sampiens
ENCFF000SAH	ENCBS251AAA	ENCSR000DML	CTCF-human	EFO:0001203	MCF-7	immortalized cell line	Homo sampiens
ENCFF484ASN	ENCBS251AAA	ENCSR000DML	CTCF-human	EFO:0001203	MCF-7	immortalized cell line	Homo sampiens
ENCFF520PEP	ENCBS251AAA	ENCSR000DML	CTCF-human	EFO:0001203	MCF-7	immortalized cell line	Homo sampiens
ENCFF990EXV	ENCBS133MOQ	ENCSR494TNM	CTCF-human	UBERON:0000473	Testis	tissue	Homo sampiens
ENCFF001GWJ	ENCBS004ENC	ENCSR000DPM	CTCF-human	CL:0002553	Fibroblast of lung	primary cell	Homo sampiens
ENCFF001GWP	ENCBS554API	ENCSR000DPM	CTCF-human	CL:0002553	Fibroblast of lung	primary cell	Homo sampiens
ENCFF873WTQ	ENCBS554API	ENCSR000DPM	CTCF-human	CL:0002553	Fibroblast of lung	primary cell	Homo sampiens
ENCFF316KUR	ENCBS004ENC	ENCSR000DPM	CTCF-human	CL:0002553	Fibroblast of lung	primary cell	Homo sampiens
ENCFF034SMD	ENCBS835BNK	ENCSR925GDS	CTCF-human	UBERON:0001159	Sigmoid colon	tissue	Homo sampiens
ENCFF928FSC	ENCBS904HZU	ENCSR911GFJ	CTCF-human	UBERON:0001114	Right lobe of liver	tissue	Homo sampiens
ENCFF239CRJ	ENCBS025PFE	ENCSR559KAB	CTCF-human	UBERON:0004648	Esophagus muscularis mucosa	tissue	Homo sampiens
ENCFF385SNU	ENCBS802IML	ENCSR640BMC	CTCF-human	UBERON:0004550	Gastroesophageal sphincter	tissue	Homo sampiens
ENCFF242CDB	ENCBS373AAA	ENCSR932ZMX	CTCF-human	EFO:0004905	Induced pluripotent stem cell	induced pluripotent stem cell line	Homo sampiens
ENCFF380SLU	ENCBS368AAA	ENCSR932ZMX	CTCF-human	EFO:0004905	Induced pluripotent stem cell	induced pluripotent stem cell line	Homo sampiens
ENCFF225TLR	ENCBS631JUH	ENCSR720USO	CTCF-human	UBERON:0002367	Prostate gland	tissue	Homo sampiens
ENCFF001HVT	ENCBS936GPP	ENCSR000DWY	CTCF-human	CL:0002553	Fibroblast of lung	primary cell	Homo sampiens
ENCFF001HAP	ENCBS146QHV	ENCSR000DQW	CTCF-human	EFO:0002783	GM06990	immortalized cell line	Homo sampiens
ENCFF001HAR	ENCBS185XLT	ENCSR000DQW	CTCF-human	EFO:0002783	GM06990	immortalized cell line	Homo sampiens
ENCFF524OIZ	ENCBS185XLT	ENCSR000DQW	CTCF-human	EFO:0002783	GM06990	immortalized cell line	Homo sampiens
ENCFF451AFR	ENCBS146QHV	ENCSR000DQW	CTCF-human	EFO:0002783	GM06990	immortalized cell line	Homo sampiens
ENCFF228BXR	ENCBS987JQH	ENCSR243INX	CTCF-human	EFO:0002847	PC-9	immortalized cell line	Homo sampiens
ENCFF609XOY	ENCBS177ANS	ENCSR243INX	CTCF-human	EFO:0002847	PC-9	immortalized cell line	Homo sampiens
ENCFF000BKE	ENCBS023XCT	ENCSR000ANE	CTCF-human	CL:0000515	Skeletal muscle myoblast	primary cell	Homo sampiens
ENCFF000BKF	ENCBS914GNL	ENCSR000ANE	CTCF-human	CL:0000515	Skeletal muscle myoblast	primary cell	Homo sampiens
ENCFF343NVK	ENCBS023XCT	ENCSR000ANE	CTCF-human	CL:0000515	Skeletal muscle myoblast	primary cell	Homo sampiens
ENCFF918AVK	ENCBS914GNL	ENCSR000ANE	CTCF-human	CL:0000515	Skeletal muscle myoblast	primary cell	Homo sampiens
ENCFF000RPH	ENCBS384ENC	ENCSR000DKX	CTCF-human	EFO:0002785	GM12891	immortalized cell line	Homo sampiens
ENCFF000RPM	ENCBS384ENC	ENCSR000DKX	CTCF-human	EFO:0002785	GM12891	immortalized cell line	Homo sampiens
ENCFF000SAR	ENCBS017ENC	ENCSR000DMR	CTCF-human	EFO:0001203	MCF-7	immortalized cell line	Homo sampiens
ENCFF000SAT	ENCBS017ENC	ENCSR000DMR	CTCF-human	EFO:0001203	MCF-7	immortalized cell line	Homo sampiens
ENCFF823CUE	ENCBS017ENC	ENCSR000DMR	CTCF-human	EFO:0001203	MCF-7	immortalized cell line	Homo sampiens
ENCFF550HPW	ENCBS017ENC	ENCSR000DMR	CTCF-human	EFO:0001203	MCF-7	immortalized cell line	Homo sampiens
ENCFF000BQQ	ENCBS717AAA	ENCSR000ALA	CTCF-human	CL:0002618	Endothelial cell of umbilical vein	primary cell	Homo sampiens
ENCFF000BQR	ENCBS717AAA	ENCSR000ALA	CTCF-human	CL:0002618	Endothelial cell of umbilical vein	primary cell	Homo sampiens
ENCFF000BQT	ENCBS717AAA	ENCSR000ALA	CTCF-human	CL:0002618	Endothelial cell of umbilical vein	primary cell	Homo sampiens
ENCFF531FEB	ENCBS114DQJ	ENCSR304XUZ	CTCF-human	UBERON:0008367	Breast epithelium	tissue	Homo sampiens
ENCFF001HMW	ENCBS031GUL	ENCSR000DUB	CTCF-human	EFO:0002791	HeLa-S3	immortalized cell line	Homo sampiens
ENCFF001HNA	ENCBS254ZSR	ENCSR000DUB	CTCF-human	EFO:0002791	HeLa-S3	immortalized cell line	Homo sampiens
ENCFF872VKZ	ENCBS254ZSR	ENCSR000DUB	CTCF-human	EFO:0002791	HeLa-S3	immortalized cell line	Homo sampiens
ENCFF122HJS	ENCBS031GUL	ENCSR000DUB	CTCF-human	EFO:0002791	HeLa-S3	immortalized cell line	Homo sampiens
ENCFF000RNM	ENCBS183AAA	ENCSR000DKP	CTCF-human	EFO:0005334	GM10248	immortalized cell line	Homo sampiens
ENCFF000RNO	ENCBS183AAA	ENCSR000DKP	CTCF-human	EFO:0005334	GM10248	immortalized cell line	Homo sampiens
ENCFF000RPW	ENCBS220AAA	ENCSR000DKZ	CTCF-human	EFO:0005345	GM13976	immortalized cell line	Homo sampiens
ENCFF000RPY	ENCBS220AAA	ENCSR000DKZ	CTCF-human	EFO:0005345	GM13976	immortalized cell line	Homo sampiens
ENCFF000RWW	ENCBS349AAA	ENCSR000DMC	CTCF-human	UBERON:0002113	Kidney	tissue	Homo sampiens
ENCFF000RWX	ENCBS136AAA	ENCSR000DMC	CTCF-human	UBERON:0002113	Kidney	tissue	Homo sampiens
ENCFF000RWZ	ENCBS137AAA	ENCSR000DMC	CTCF-human	UBERON:0002113	Kidney	tissue	Homo sampiens
ENCFF822RMX	ENCBS919RQL	ENCSR341VKC	CTCF-human	UBERON:0001159	Sigmoid colon	tissue	Homo sampiens
ENCFF957IJL	ENCBS018GXW	ENCSR756ZKG	CTCF-human	EFO:0006710	OCI-LY3	immortalized cell line	Homo sampiens
ENCFF496TSK	ENCBS757GPD	ENCSR756ZKG	CTCF-human	EFO:0006710	OCI-LY3	immortalized cell line	Homo sampiens
ENCFF000ZQH	ENCBS376ENC	ENCSR000EIC	CTCF-human	EFO:0003072	SK-N-SH	immortalized cell line	Homo sampiens
ENCFF000ZQK	ENCBS376ENC	ENCSR000EIC	CTCF-human	EFO:0003072	SK-N-SH	immortalized cell line	Homo sampiens
ENCFF436XSF	ENCBS376ENC	ENCSR000EIC	CTCF-human	EFO:0003072	SK-N-SH	immortalized cell line	Homo sampiens
ENCFF898GKX	ENCBS376ENC	ENCSR000EIC	CTCF-human	EFO:0003072	SK-N-SH	immortalized cell line	Homo sampiens
ENCFF720JWD	ENCBS666LUO	ENCSR742XZS	CTCF-human	UBERON:0010414	Omental fat pad	tissue	Homo sampiens
ENCFF590YRR	ENCBS345HRP	ENCSR222SQE	CTCF-human	UBERON:0001159	Sigmoid colon	tissue	Homo sampiens
ENCFF262AKB	ENCBS218BVZ	ENCSR970UZD	CTCF-human	UBERON:0008952	Upper lobe of left lung	tissue	Homo sampiens
ENCFF546PNW	ENCBS443VUU	ENCSR252XWG	CTCF-human	UBERON:0004264	Lower leg skin	tissue	Homo sampiens
ENCFF000RMN	ENCBS284AAA	ENCSR000DKL	CTCF-human	CL:0002620	Skin fibroblast	primary cell	Homo sampiens
ENCFF000RMQ	ENCBS284AAA	ENCSR000DKL	CTCF-human	CL:0002620	Skin fibroblast	primary cell	Homo sampiens
ENCFF001GXX	ENCBS065SFO	ENCSR000DPV	CTCF-human	CL:2000013	Fibroblast of skin of abdomen	primary cell	Homo sampiens
ENCFF001GYE	ENCBS793PDT	ENCSR000DPV	CTCF-human	CL:2000013	Fibroblast of skin of abdomen	primary cell	Homo sampiens
ENCFF450ZYV	ENCBS065SFO	ENCSR000DPV	CTCF-human	CL:2000013	Fibroblast of skin of abdomen	primary cell	Homo sampiens
ENCFF068EQL	ENCBS793PDT	ENCSR000DPV	CTCF-human	CL:2000013	Fibroblast of skin of abdomen	primary cell	Homo sampiens
ENCFF891NAK	ENCBS926VJZ	ENCSR770IWO	CTCF-human	UBERON:0002369	Adrenal gland	tissue	Homo sampiens
ENCFF021JJL	ENCBS824TRN	ENCSR661NXJ	CTCF-human	UBERON:0008367	Breast epithelium	tissue	Homo sampiens
ENCFF961OUB	ENCBS728DKU	ENCSR146BGM	CTCF-human	UBERON:0004550	Gastroesophageal sphincter	tissue	Homo sampiens
ENCFF459EXC	ENCBS728DKU	ENCSR146BGM	CTCF-human	UBERON:0004550	Gastroesophageal sphincter	tissue	Homo sampiens
ENCFF714MWU	ENCBS404OGY	ENCSR799WDT	CTCF-human	UBERON:0001211	Peyer's patch	tissue	Homo sampiens
ENCFF336YLG	ENCBS413MJK	ENCSR955BIB	CTCF-human	UBERON:0002046	Thyroid gland	tissue	Homo sampiens
ENCFF001HXH	ENCBS172JMM	ENCSR000DXQ	CTCF-human	EFO:0003072	SK-N-SH	immortalized cell line	Homo sampiens
ENCFF001HXM	ENCBS606NNZ	ENCSR000DXQ	CTCF-human	EFO:0003072	SK-N-SH	immortalized cell line	Homo sampiens
ENCFF998ZWT	ENCBS172JMM	ENCSR000DXQ	CTCF-human	EFO:0003072	SK-N-SH	immortalized cell line	Homo sampiens
ENCFF823NFU	ENCBS606NNZ	ENCSR000DXQ	CTCF-human	EFO:0003072	SK-N-SH	immortalized cell line	Homo sampiens
ENCFF197PVC	ENCBS762FDB	ENCSR606TNN	CTCF-human	UBERON:0000996	Vagina	tissue	Homo sampiens
ENCFF555CXI	ENCBS467IBM	ENCSR375VXU	CTCF-human	UBERON:0001211	Peyer's patch	tissue	Homo sampiens
ENCFF001HHN	ENCBS657FSS	ENCSR000DRZ	CTCF-human	EFO:0002784	GM12878	immortalized cell line	Homo sampiens
ENCFF001HHS	ENCBS506MRD	ENCSR000DRZ	CTCF-human	EFO:0002784	GM12878	immortalized cell line	Homo sampiens
ENCFF607GOG	ENCBS657FSS	ENCSR000DRZ	CTCF-human	EFO:0002784	GM12878	immortalized cell line	Homo sampiens
ENCFF412PHP	ENCBS506MRD	ENCSR000DRZ	CTCF-human	EFO:0002784	GM12878	immortalized cell line	Homo sampiens
ENCFF234PLD	ENCBS282GPE	ENCSR829HTO	CTCF-human	UBERON:0002367	Prostate gland	tissue	Homo sampiens
ENCFF000ANY	ENCBS282AAA	ENCSR000AQU	CTCF-human	EFO:0007074	DND-41	immortalized cell line	Homo sampiens
ENCFF000AOA	ENCBS688JZQ	ENCSR000AQU	CTCF-human	EFO:0007074	DND-41	immortalized cell line	Homo sampiens
ENCFF737GKG	ENCBS688JZQ	ENCSR000AQU	CTCF-human	EFO:0007074	DND-41	immortalized cell line	Homo sampiens
ENCFF245POD	ENCBS282AAA	ENCSR000AQU	CTCF-human	EFO:0007074	DND-41	immortalized cell line	Homo sampiens
ENCFF000AHG	ENCBS160AAA	ENCSR000AUE	CTCF-human	EFO:0001086	A549	immortalized cell line	Homo sampiens
ENCFF000AHI	ENCBS160AAA	ENCSR000AUE	CTCF-human	EFO:0001086	A549	immortalized cell line	Homo sampiens
ENCFF000CUV	ENCBS341AAA	ENCSR000APF	CTCF-human	CL:0000062	Osteoblast	primary cell	Homo sampiens
ENCFF000CUX	ENCBS653BJC	ENCSR000APF	CTCF-human	CL:0000062	Osteoblast	primary cell	Homo sampiens
ENCFF233ITE	ENCBS341AAA	ENCSR000APF	CTCF-human	CL:0000062	Osteoblast	primary cell	Homo sampiens
ENCFF457SKJ	ENCBS653BJC	ENCSR000APF	CTCF-human	CL:0000062	Osteoblast	primary cell	Homo sampiens
ENCFF001HKX	ENCBS395ENC	ENCSR000DTL	CTCF-human	CL:0000706	Choroid plexus epithelial cell	primary cell	Homo sampiens
ENCFF001HLC	ENCBS559KYO	ENCSR000DTL	CTCF-human	CL:0000706	Choroid plexus epithelial cell	primary cell	Homo sampiens
ENCFF519LBB	ENCBS395ENC	ENCSR000DTL	CTCF-human	CL:0000706	Choroid plexus epithelial cell	primary cell	Homo sampiens
ENCFF788YCK	ENCBS559KYO	ENCSR000DTL	CTCF-human	CL:0000706	Choroid plexus epithelial cell	primary cell	Homo sampiens
ENCFF712ZNQ	ENCBS009ALA	ENCSR028YEV	CTCF-human	UBERON:0002106	Spleen	tissue	Homo sampiens
ENCFF569UCD	ENCBS009ALA	ENCSR028YEV	CTCF-human	UBERON:0002106	Spleen	tissue	Homo sampiens
ENCFF215LLM	ENCBS835BNK	ENCSR323POR	CTCF-human	UBERON:0001159	Sigmoid colon	tissue	Homo sampiens
ENCFF001HKB	ENCBS501ROB	ENCSR000DTF	CTCF-human	CL:0002548	Cardiac fibroblast	primary cell	Homo sampiens
ENCFF051HDO	ENCBS572ESP	ENCSR102CSD	CTCF-human	UBERON:0001157	Transverse colon	tissue	Homo sampiens
ENCFF347PVY	ENCBS866IBT	ENCSR833FWC	CTCF-human	UBERON:0001157	Transverse colon	tissue	Homo sampiens
ENCFF001HDY	ENCBS213AAA	ENCSR000DRJ	CTCF-human	EFO:0005342	GM12869	immortalized cell line	Homo sampiens
ENCFF001HEE	ENCBS146ETE	ENCSR000DRJ	CTCF-human	EFO:0005342	GM12869	immortalized cell line	Homo sampiens
ENCFF184ESH	ENCBS213AAA	ENCSR000DRJ	CTCF-human	EFO:0005342	GM12869	immortalized cell line	Homo sampiens
ENCFF830VEV	ENCBS146ETE	ENCSR000DRJ	CTCF-human	EFO:0005342	GM12869	immortalized cell line	Homo sampiens
ENCFF001GWZ	ENCBS112TMK	ENCSR000DPP	CTCF-human	CL:2000012	Fibroblast of pedal digit skin	primary cell	Homo sampiens
ENCFF001GXC	ENCBS394ULN	ENCSR000DPP	CTCF-human	CL:2000012	Fibroblast of pedal digit skin	primary cell	Homo sampiens
ENCFF217RCW	ENCBS394ULN	ENCSR000DPP	CTCF-human	CL:2000012	Fibroblast of pedal digit skin	primary cell	Homo sampiens
ENCFF004OMB	ENCBS112TMK	ENCSR000DPP	CTCF-human	CL:2000012	Fibroblast of pedal digit skin	primary cell	Homo sampiens
ENCFF001GVI	ENCBS163AAA	ENCSR000DPF	CTCF-human	EFO:0001086	A549	immortalized cell line	Homo sampiens
ENCFF001GVJ	ENCBS858LUL	ENCSR000DPF	CTCF-human	EFO:0001086	A549	immortalized cell line	Homo sampiens
ENCFF076ZNH	ENCBS163AAA	ENCSR000DPF	CTCF-human	EFO:0001086	A549	immortalized cell line	Homo sampiens
ENCFF874DYB	ENCBS858LUL	ENCSR000DPF	CTCF-human	EFO:0001086	A549	immortalized cell line	Homo sampiens
ENCFF485QSR	ENCBS644JJL	ENCSR790VEV	CTCF-human	UBERON:0002190	Adipose	tissue	Homo sampiens
ENCFF779DOP	ENCBS644JJL	ENCSR790VEV	CTCF-human	UBERON:0002190	Adipose	tissue	Homo sampiens
ENCFF308BIP	ENCBS962HLD	ENCSR618QYE	CTCF-human	UBERON:0000945	Stomach	tissue	Homo sampiens
ENCFF001HWB	ENCBS166KRI	ENCSR000DXD	CTCF-human	CL:0002306	Epithelial cell of proximal tubule	primary cell	Homo sampiens
ENCFF001HWC	ENCBS402ENC	ENCSR000DXD	CTCF-human	CL:0002306	Epithelial cell of proximal tubule	primary cell	Homo sampiens
ENCFF329NOM	ENCBS402ENC	ENCSR000DXD	CTCF-human	CL:0002306	Epithelial cell of proximal tubule	primary cell	Homo sampiens
ENCFF296JDR	ENCBS166KRI	ENCSR000DXD	CTCF-human	CL:0002306	Epithelial cell of proximal tubule	primary cell	Homo sampiens
ENCFF000ARG	ENCBS715VCP	ENCSR000AKB	CTCF-human	EFO:0002784	GM12878	immortalized cell line	Homo sampiens
ENCFF000ARI	ENCBS830CIQ	ENCSR000AKB	CTCF-human	EFO:0002784	GM12878	immortalized cell line	Homo sampiens
ENCFF343LTM	ENCBS830CIQ	ENCSR000AKB	CTCF-human	EFO:0002784	GM12878	immortalized cell line	Homo sampiens
ENCFF001HIL	ENCBS115FPY	ENCSR000DSZ	CTCF-human	CL:0002603	Astrocyte of the cerebellum	primary cell	Homo sampiens
ENCFF001HIM	ENCBS303AAA	ENCSR000DSZ	CTCF-human	CL:0002603	Astrocyte of the cerebellum	primary cell	Homo sampiens
ENCFF935VDG	ENCBS115FPY	ENCSR000DSZ	CTCF-human	CL:0002603	Astrocyte of the cerebellum	primary cell	Homo sampiens
ENCFF022ACL	ENCBS303AAA	ENCSR000DSZ	CTCF-human	CL:0002603	Astrocyte of the cerebellum	primary cell	Homo sampiens
ENCFF244RSE	ENCBS425WFZ	ENCSR408XTO	CTCF-human	UBERON:0001150	Body of pancreas	tissue	Homo sampiens
ENCFF011CRJ	ENCBS981ZAE	ENCSR402IDP	CTCF-human	EFO:0005724	MM.1S	immortalized cell line	Homo sampiens
ENCFF102YMG	ENCBS241TLI	ENCSR402IDP	CTCF-human	EFO:0005724	MM.1S	immortalized cell line	Homo sampiens
ENCFF001HTC	ENCBS922RYG	ENCSR000DWE	CTCF-human	EFO:0002067	K562	immortalized cell line	Homo sampiens
ENCFF001HTD	ENCBS511YCF	ENCSR000DWE	CTCF-human	EFO:0002067	K562	immortalized cell line	Homo sampiens
ENCFF001GYW	ENCBS271SFD	ENCSR000DQD	CTCF-human	EFO:0005725	BE2C	immortalized cell line	Homo sampiens
ENCFF001GZC	ENCBS982TUR	ENCSR000DQD	CTCF-human	EFO:0005725	BE2C	immortalized cell line	Homo sampiens
ENCFF921SZK	ENCBS982TUR	ENCSR000DQD	CTCF-human	EFO:0005725	BE2C	immortalized cell line	Homo sampiens
ENCFF170UJD	ENCBS271SFD	ENCSR000DQD	CTCF-human	EFO:0005725	BE2C	immortalized cell line	Homo sampiens
ENCFF158YVQ	ENCBS011GFV	ENCSR972LYL	CTCF-human	UBERON:0008952	Upper lobe of left lung	tissue	Homo sampiens
ENCFF001HXV	ENCBS282DQM	ENCSR000DXW	CTCF-human	EFO:0005715	WERI-Rb-1	immortalized cell line	Homo sampiens
ENCFF001HXX	ENCBS283KOW	ENCSR000DXW	CTCF-human	EFO:0005715	WERI-Rb-1	immortalized cell line	Homo sampiens
ENCFF171VRI	ENCBS283KOW	ENCSR000DXW	CTCF-human	EFO:0005715	WERI-Rb-1	immortalized cell line	Homo sampiens
ENCFF025QGP	ENCBS282DQM	ENCSR000DXW	CTCF-human	EFO:0005715	WERI-Rb-1	immortalized cell line	Homo sampiens
ENCFF186KYZ	ENCBS369AAA	ENCSR619IUE	CTCF-human	NTR:0000560	Bipolar spindle neuron	in vitro differentiated cells	Homo sampiens
ENCFF121VXJ	ENCBS369AAA	ENCSR619IUE	CTCF-human	NTR:0000560	Bipolar spindle neuron	in vitro differentiated cells	Homo sampiens
ENCFF622IZB	ENCBS089HGD	ENCSR027FSZ	CTCF-human	UBERON:0008952	Upper lobe of left lung	tissue	Homo sampiens
ENCFF001HGN	ENCBS790RFB	ENCSR000DRR	CTCF-human	EFO:0001161	GM12874	immortalized cell line	Homo sampiens
ENCFF001HGS	ENCBS218AAA	ENCSR000DRR	CTCF-human	EFO:0001161	GM12874	immortalized cell line	Homo sampiens
ENCFF044UKM	ENCBS790RFB	ENCSR000DRR	CTCF-human	EFO:0001161	GM12874	immortalized cell line	Homo sampiens
ENCFF035XEM	ENCBS218AAA	ENCSR000DRR	CTCF-human	EFO:0001161	GM12874	immortalized cell line	Homo sampiens
ENCFF000ONK	ENCBS111ENC	ENCSR000BNH	CTCF-human	EFO:0003042	H1-hESC	stem cell	Homo sampiens
ENCFF000ONN	ENCBS111ENC	ENCSR000BNH	CTCF-human	EFO:0003042	H1-hESC	stem cell	Homo sampiens
ENCFF639ACF	ENCBS111ENC	ENCSR000BNH	CTCF-human	EFO:0003042	H1-hESC	stem cell	Homo sampiens
ENCFF483RYF	ENCBS111ENC	ENCSR000BNH	CTCF-human	EFO:0003042	H1-hESC	stem cell	Homo sampiens
ENCFF370DPP	ENCBS440AZZ	ENCSR692ILH	CTCF-human	UBERON:0002106	Spleen	tissue	Homo sampiens
ENCFF224VJS	ENCBS780KFJ	ENCSR234HEM	CTCF-human	UBERON:0002106	Spleen	tissue	Homo sampiens
ENCFF000CIQ	ENCBS311WGW	ENCSR000APM	CTCF-human	CL:0002551	Fibroblast of dermis	primary cell	Homo sampiens
ENCFF000CIT	ENCBS617RCN	ENCSR000APM	CTCF-human	CL:0002551	Fibroblast of dermis	primary cell	Homo sampiens
ENCFF888NSJ	ENCBS311WGW	ENCSR000APM	CTCF-human	CL:0002551	Fibroblast of dermis	primary cell	Homo sampiens
ENCFF562WQJ	ENCBS617RCN	ENCSR000APM	CTCF-human	CL:0002551	Fibroblast of dermis	primary cell	Homo sampiens
ENCFF000RQX	ENCBS385ENC	ENCSR000DLE	CTCF-human	EFO:0002789	GM19239	immortalized cell line	Homo sampiens
ENCFF000RRB	ENCBS385ENC	ENCSR000DLE	CTCF-human	EFO:0002789	GM19239	immortalized cell line	Homo sampiens
ENCFF001HBB	ENCBS187AAA	ENCSR000DQY	CTCF-human	EFO:0005353	GM12801	immortalized cell line	Homo sampiens
ENCFF000RTZ	ENCBS773AAA	ENCSR000DLS	CTCF-human	EFO:0001187	HepG2	immortalized cell line	Homo sampiens
ENCFF000RUB	ENCBS773AAA	ENCSR000DLS	CTCF-human	EFO:0001187	HepG2	immortalized cell line	Homo sampiens
ENCFF387LUX	ENCBS822YKL	ENCSR066GBX	CTCF-human	UBERON:0006631	Right atrium auricular region	tissue	Homo sampiens
ENCFF080WMH	ENCBS296KUN	ENCSR776AEL	CTCF-human	UBERON:0000945	Stomach	tissue	Homo sampiens
ENCFF000RMV	ENCBS173AAA	ENCSR000DKN	CTCF-human	EFO:0002782	H54	immortalized cell line	Homo sampiens
ENCFF000RMY	ENCBS173AAA	ENCSR000DKN	CTCF-human	EFO:0002782	H54	immortalized cell line	Homo sampiens
ENCFF074APO	ENCBS173AAA	ENCSR000DKN	CTCF-human	EFO:0002782	H54	immortalized cell line	Homo sampiens
ENCFF440WDV	ENCBS173AAA	ENCSR000DKN	CTCF-human	EFO:0002782	H54	immortalized cell line	Homo sampiens
ENCFF577BMV	ENCBS214FBD	ENCSR482PMN	CTCF-human	UBERON:0002106	Spleen	tissue	Homo sampiens
ENCFF000RQG	ENCBS221AAA	ENCSR000DLB	CTCF-human	EFO:0005346	GM13977	immortalized cell line	Homo sampiens
ENCFF000RQH	ENCBS221AAA	ENCSR000DLB	CTCF-human	EFO:0005346	GM13977	immortalized cell line	Homo sampiens
ENCFF000YLT	ENCBS039ENC	ENCSR000EGM	CTCF-human	EFO:0002067	K562	immortalized cell line	Homo sampiens
ENCFF000YLU	ENCBS039ENC	ENCSR000EGM	CTCF-human	EFO:0002067	K562	immortalized cell line	Homo sampiens
ENCFF001HFV	ENCBS217AAA	ENCSR000DRP	CTCF-human	EFO:0001160	GM12873	immortalized cell line	Homo sampiens
ENCFF001HFX	ENCBS800BFZ	ENCSR000DRP	CTCF-human	EFO:0001160	GM12873	immortalized cell line	Homo sampiens
ENCFF001HGD	ENCBS502JSQ	ENCSR000DRP	CTCF-human	EFO:0001160	GM12873	immortalized cell line	Homo sampiens
ENCFF771YZF	ENCBS800BFZ	ENCSR000DRP	CTCF-human	EFO:0001160	GM12873	immortalized cell line	Homo sampiens
ENCFF471JZR	ENCBS217AAA	ENCSR000DRP	CTCF-human	EFO:0001160	GM12873	immortalized cell line	Homo sampiens
ENCFF325SIY	ENCBS502JSQ	ENCSR000DRP	CTCF-human	EFO:0001160	GM12873	immortalized cell line	Homo sampiens
ENCFF001HCV	ENCBS210AAA	ENCSR000DRF	CTCF-human	EFO:0005339	GM12866	immortalized cell line	Homo sampiens
ENCFF001HDA	ENCBS210AAA	ENCSR000DRF	CTCF-human	EFO:0005339	GM12866	immortalized cell line	Homo sampiens
ENCFF120DRY	ENCBS210AAA	ENCSR000DRF	CTCF-human	EFO:0005339	GM12866	immortalized cell line	Homo sampiens
ENCFF981AOF	ENCBS210AAA	ENCSR000DRF	CTCF-human	EFO:0005339	GM12866	immortalized cell line	Homo sampiens
ENCFF001HUI	ENCBS390ENC	ENCSR000DWN	CTCF-human	EFO:0002798	NB4	immortalized cell line	Homo sampiens
ENCFF753ZPS	ENCBS314VNR	ENCSR173AIR	CTCF-human	UBERON:0000945	Stomach	tissue	Homo sampiens
ENCFF779SGY	ENCBS314VNR	ENCSR173AIR	CTCF-human	UBERON:0000945	Stomach	tissue	Homo sampiens
ENCFF972JKW	ENCBS659AMF	ENCSR769WKR	CTCF-human	UBERON:0001157	Transverse colon	tissue	Homo sampiens
ENCFF093JHV	ENCBS927UKP	ENCSR773JBP	CTCF-human	UBERON:0006920	Esophagus squamous epithelium	tissue	Homo sampiens
ENCFF000CFM	ENCBS020ENC	ENCSR000AOO	CTCF-human	CL:0000127	Astrocyte	primary cell	Homo sampiens
ENCFF000CFP	ENCBS096LWS	ENCSR000AOO	CTCF-human	CL:0000127	Astrocyte	primary cell	Homo sampiens
ENCFF714RHW	ENCBS096LWS	ENCSR000AOO	CTCF-human	CL:0000127	Astrocyte	primary cell	Homo sampiens
ENCFF717LQB	ENCBS020ENC	ENCSR000AOO	CTCF-human	CL:0000127	Astrocyte	primary cell	Homo sampiens
ENCFF000CLY	ENCBS584ENC	ENCSR000ALJ	CTCF-human	CL:0000312	Keratinocyte	primary cell	Homo sampiens
ENCFF000CLZ	ENCBS585ENC	ENCSR000ALJ	CTCF-human	CL:0000312	Keratinocyte	primary cell	Homo sampiens
ENCFF000CMA	ENCBS935RSN	ENCSR000ALJ	CTCF-human	CL:0000312	Keratinocyte	primary cell	Homo sampiens
ENCFF328QEN	ENCBS935RSN	ENCSR000ALJ	CTCF-human	CL:0000312	Keratinocyte	primary cell	Homo sampiens
ENCFF813IJM	ENCBS585ENC	ENCSR000ALJ	CTCF-human	CL:0000312	Keratinocyte	primary cell	Homo sampiens
ENCFF437NJO	ENCBS584ENC	ENCSR000ALJ	CTCF-human	CL:0000312	Keratinocyte	primary cell	Homo sampiens
ENCFF000YCI	ENCBS379ENC	ENCSR000EFI	CTCF-human	NTR:0004647	IMR-90	primary cell	Homo sampiens
ENCFF000YCO	ENCBS379ENC	ENCSR000EFI	CTCF-human	NTR:0004647	IMR-90	primary cell	Homo sampiens
ENCFF066FGA	ENCBS379ENC	ENCSR000EFI	CTCF-human	NTR:0004647	IMR-90	primary cell	Homo sampiens
ENCFF847VPR	ENCBS379ENC	ENCSR000EFI	CTCF-human	NTR:0004647	IMR-90	primary cell	Homo sampiens
ENCFF000CCN	ENCBS865RXK	ENCSR000ATN	CTCF-human	CL:0001054	Monocytes-CD14+	primary cell	Homo sampiens
ENCFF000CCS	ENCBS188BKX	ENCSR000ATN	CTCF-human	CL:0001054	Monocytes-CD14+	primary cell	Homo sampiens
ENCFF853XVP	ENCBS865RXK	ENCSR000ATN	CTCF-human	CL:0001054	Monocytes-CD14+	primary cell	Homo sampiens
ENCFF442UIU	ENCBS188BKX	ENCSR000ATN	CTCF-human	CL:0001054	Monocytes-CD14+	primary cell	Homo sampiens
ENCFF773HIM	ENCBS374AAA	ENCSR066BZZ	CTCF-human	NTR:0000560	Bipolar spindle neuron	in vitro differentiated cells	Homo sampiens
ENCFF257GMX	ENCBS369AAA	ENCSR066BZZ	CTCF-human	NTR:0000560	Bipolar spindle neuron	in vitro differentiated cells	Homo sampiens
ENCFF000ROM	ENCBS337LQM	ENCSR000DKV	CTCF-human	EFO:0002784	GM12878	immortalized cell line	Homo sampiens
ENCFF000RON	ENCBS337LQM	ENCSR000DKV	CTCF-human	EFO:0002784	GM12878	immortalized cell line	Homo sampiens
ENCFF000ROQ	ENCBS337LQM	ENCSR000DKV	CTCF-human	EFO:0002784	GM12878	immortalized cell line	Homo sampiens
ENCFF508CNG	ENCBS867VCV	ENCSR265PFQ	CTCF-human	UBERON:0001150	Body of pancreas	tissue	Homo sampiens
ENCFF000BAJ	ENCBS075PNA	ENCSR000AOA	CTCF-human	EFO:0002791	HeLa-S3	immortalized cell line	Homo sampiens
ENCFF000BAL	ENCBS655ARO	ENCSR000AOA	CTCF-human	EFO:0002791	HeLa-S3	immortalized cell line	Homo sampiens
ENCFF474UIC	ENCBS075PNA	ENCSR000AOA	CTCF-human	EFO:0002791	HeLa-S3	immortalized cell line	Homo sampiens
ENCFF163WNN	ENCBS655ARO	ENCSR000AOA	CTCF-human	EFO:0002791	HeLa-S3	immortalized cell line	Homo sampiens
ENCFF000BNJ	ENCBS276EMT	ENCSR000ANS	CTCF-human	CL:0002372	Myotube	in vitro differentiated cells	Homo sampiens
ENCFF000BNL	ENCBS639UHS	ENCSR000ANS	CTCF-human	CL:0002372	Myotube	in vitro differentiated cells	Homo sampiens
ENCFF276SUL	ENCBS276EMT	ENCSR000ANS	CTCF-human	CL:0002372	Myotube	in vitro differentiated cells	Homo sampiens
ENCFF620MCZ	ENCBS639UHS	ENCSR000ANS	CTCF-human	CL:0002372	Myotube	in vitro differentiated cells	Homo sampiens
ENCFF123STP	ENCBS867AWW	ENCSR798NVH	CTCF-human	UBERON:0000995	Uterus	tissue	Homo sampiens
ENCFF985JPM	ENCBS204MYN	ENCSR582MTM	CTCF-human	UBERON:0004264	Lower leg skin	tissue	Homo sampiens
ENCFF001GVW	ENCBS747YUA	ENCSR000DPG	CTCF-human	CL:2000014	Fibroblast of upper leg skin	primary cell	Homo sampiens
ENCFF001GWC	ENCBS338DRP	ENCSR000DPG	CTCF-human	CL:2000014	Fibroblast of upper leg skin	primary cell	Homo sampiens
ENCFF647YII	ENCBS747YUA	ENCSR000DPG	CTCF-human	CL:2000014	Fibroblast of upper leg skin	primary cell	Homo sampiens
ENCFF784IKK	ENCBS338DRP	ENCSR000DPG	CTCF-human	CL:2000014	Fibroblast of upper leg skin	primary cell	Homo sampiens
ENCFF358FRE	ENCBS906UGR	ENCSR175FLL	CTCF-human	UBERON:0001621	Coronary artery	tissue	Homo sampiens
ENCFF877MCP	ENCBS969YPI	ENCSR003SZZ	CTCF-human	UBERON:0006920	Esophagus squamous epithelium	tissue	Homo sampiens
ENCFF312ULR	ENCBS055JKA	ENCSR014GSQ	CTCF-human	UBERON:0002369	Adrenal gland	tissue	Homo sampiens
ENCFF000CQJ	ENCBS149EDI	ENCSR000ANO	CTCF-human	CL:0002553	Fibroblast of lung	primary cell	Homo sampiens
ENCFF000CQM	ENCBS339AAA	ENCSR000ANO	CTCF-human	CL:0002553	Fibroblast of lung	primary cell	Homo sampiens
ENCFF345IDF	ENCBS339AAA	ENCSR000ANO	CTCF-human	CL:0002553	Fibroblast of lung	primary cell	Homo sampiens
ENCFF211UGH	ENCBS149EDI	ENCSR000ANO	CTCF-human	CL:0002553	Fibroblast of lung	primary cell	Homo sampiens
ENCFF000RGR	ENCBS597ENC	ENCSR000BNO	CTCF-human	EFO:0001247	T47D	immortalized cell line	Homo sampiens
ENCFF000RGU	ENCBS597ENC	ENCSR000BNO	CTCF-human	EFO:0001247	T47D	immortalized cell line	Homo sampiens
ENCFF266NHV	ENCBS597ENC	ENCSR000BNO	CTCF-human	EFO:0001247	T47D	immortalized cell line	Homo sampiens
ENCFF117IWF	ENCBS597ENC	ENCSR000BNO	CTCF-human	EFO:0001247	T47D	immortalized cell line	Homo sampiens
ENCFF000RSV	ENCBS646PGB	ENCSR000DLO	CTCF-human	EFO:0002791	HeLa-S3	immortalized cell line	Homo sampiens
ENCFF000RSX	ENCBS646PGB	ENCSR000DLO	CTCF-human	EFO:0002791	HeLa-S3	immortalized cell line	Homo sampiens
ENCFF282SQP	ENCBS693ETI	ENCSR899JSO	CTCF-human	UBERON:0002369	Adrenal gland	tissue	Homo sampiens
ENCFF376VVJ	ENCBS919RQL	ENCSR721AHD	CTCF-human	UBERON:0001159	Sigmoid colon	tissue	Homo sampiens
ENCFF947XNG	ENCBS165BJP	ENCSR493APD	CTCF-human	UBERON:0000992	Ovary	tissue	Homo sampiens
ENCFF975GAM	ENCBS004OVW	ENCSR469POZ	CTCF-human	UBERON:0001323	Tibial nerve	tissue	Homo sampiens
ENCFF941RBT	ENCBS429IGV	ENCSR428BKN	CTCF-human	UBERON:0011907	Gastrocnemius medialis	tissue	Homo sampiens
ENCFF134TXS	ENCBS312CXQ	ENCSR838RUX	CTCF-human	UBERON:0006920	Esophagus squamous epithelium	tissue	Homo sampiens
ENCFF000BDU	ENCBS295NFS	ENCSR000AMA	CTCF-human	EFO:0001187	HepG2	immortalized cell line	Homo sampiens
ENCFF000BDW	ENCBS743JKX	ENCSR000AMA	CTCF-human	EFO:0001187	HepG2	immortalized cell line	Homo sampiens
ENCFF825ROK	ENCBS295NFS	ENCSR000AMA	CTCF-human	EFO:0001187	HepG2	immortalized cell line	Homo sampiens
ENCFF929VIY	ENCBS743JKX	ENCSR000AMA	CTCF-human	EFO:0001187	HepG2	immortalized cell line	Homo sampiens
ENCFF687EVJ	ENCBS360EQL	ENCSR785YRL	CTCF-human	CL:0000775	Neutrophil	primary cell	Homo sampiens
ENCFF365YNJ	ENCBS462VZJ	ENCSR785YRL	CTCF-human	CL:0000775	Neutrophil	primary cell	Homo sampiens
ENCFF000PYE	ENCBS109ENC	ENCSR000BNK	CTCFL-human	EFO:0002067	K562	immortalized cell line	Homo sampiens
ENCFF000PYH	ENCBS109ENC	ENCSR000BNK	CTCFL-human	EFO:0002067	K562	immortalized cell line	Homo sampiens
ENCFF097SZB	ENCBS109ENC	ENCSR000BNK	CTCFL-human	EFO:0002067	K562	immortalized cell line	Homo sampiens
ENCFF487BCT	ENCBS109ENC	ENCSR000BNK	CTCFL-human	EFO:0002067	K562	immortalized cell line	Homo sampiens
ENCFF000YHR	ENCBS039ENC	ENCSR000EFO	CUX1-human	EFO:0002067	K562	immortalized cell line	Homo sampiens
ENCFF000YHS	ENCBS039ENC	ENCSR000EFO	CUX1-human	EFO:0002067	K562	immortalized cell line	Homo sampiens
ENCFF377MEH	ENCBS039ENC	ENCSR000EFO	CUX1-human	EFO:0002067	K562	immortalized cell line	Homo sampiens
ENCFF353HYR	ENCBS039ENC	ENCSR000EFO	CUX1-human	EFO:0002067	K562	immortalized cell line	Homo sampiens
ENCFF000VSQ	ENCBS630AAA	ENCSR000DYR	CUX1-human	EFO:0002784	GM12878	immortalized cell line	Homo sampiens
ENCFF000VSU	ENCBS630AAA	ENCSR000DYR	CUX1-human	EFO:0002784	GM12878	immortalized cell line	Homo sampiens
ENCFF216GDM	ENCBS168ISE	ENCSR017CEO	CUX1-human	EFO:0001203	MCF-7	immortalized cell line	Homo sampiens
ENCFF853POP	ENCBS123ZGI	ENCSR017CEO	CUX1-human	EFO:0001203	MCF-7	immortalized cell line	Homo sampiens
ENCFF539AVI	ENCBS839CNN	ENCSR446LAV	DDX20-human	EFO:0002067	K562	immortalized cell line	Homo sampiens
ENCFF288YZC	ENCBS118YJZ	ENCSR446LAV	DDX20-human	EFO:0002067	K562	immortalized cell line	Homo sampiens
ENCFF875XTU	ENCBS577JGM	ENCSR387SYS	DEAF1-human	EFO:0002067	K562	immortalized cell line	Homo sampiens
ENCFF584YAE	ENCBS316CKF	ENCSR387SYS	DEAF1-human	EFO:0002067	K562	immortalized cell line	Homo sampiens
ENCFF865GUF	ENCBS812AOY	ENCSR219MKK	DEK-human	EFO:0002791	HeLa-S3	immortalized cell line	Homo sampiens
ENCFF312DGQ	ENCBS529RSF	ENCSR219MKK	DEK-human	EFO:0002791	HeLa-S3	immortalized cell line	Homo sampiens
ENCFF469DEJ	ENCBS603CUX	ENCSR987PBI	DNMT1-human	EFO:0002067	K562	immortalized cell line	Homo sampiens
ENCFF745TZN	ENCBS398HUM	ENCSR987PBI	DNMT1-human	EFO:0002067	K562	immortalized cell line	Homo sampiens
ENCFF934FGG	ENCBS670IYV	ENCSR234VCE	DPF2-human	EFO:0001203	MCF-7	immortalized cell line	Homo sampiens
ENCFF931KUQ	ENCBS158RRU	ENCSR234VCE	DPF2-human	EFO:0001203	MCF-7	immortalized cell line	Homo sampiens
ENCFF419BCJ	ENCBS839CNN	ENCSR715CCR	DPF2-human	EFO:0002067	K562	immortalized cell line	Homo sampiens
ENCFF275MTH	ENCBS118YJZ	ENCSR715CCR	DPF2-human	EFO:0002067	K562	immortalized cell line	Homo sampiens
ENCFF643FQM	ENCBS022SQU	ENCSR030OKC	DROSHA-human	EFO:0002067	K562	immortalized cell line	Homo sampiens
ENCFF435MFF	ENCBS992FSA	ENCSR030OKC	DROSHA-human	EFO:0002067	K562	immortalized cell line	Homo sampiens
ENCFF535QAA	ENCBS164KGU	ENCSR316JQA	DROSHA-human	EFO:0001187	HepG2	immortalized cell line	Homo sampiens
ENCFF807GZW	ENCBS890WPB	ENCSR316JQA	DROSHA-human	EFO:0001187	HepG2	immortalized cell line	Homo sampiens
ENCFF000XCZ	ENCBS500SDW	ENCSR000EVJ	E2F1-human	EFO:0002791	HeLa-S3	immortalized cell line	Homo sampiens
ENCFF000XDA	ENCBS500SDW	ENCSR000EVJ	E2F1-human	EFO:0002791	HeLa-S3	immortalized cell line	Homo sampiens
ENCFF483UIU	ENCBS697XFI	ENCSR563LLO	E2F1-human	EFO:0002067	K562	immortalized cell line	Homo sampiens
ENCFF768VEY	ENCBS288EEL	ENCSR563LLO	E2F1-human	EFO:0002067	K562	immortalized cell line	Homo sampiens
ENCFF000ZHT	ENCBS067ENC	ENCSR000DOR	E2F4-human	EFO:0001200	MCF 10A	immortalized cell line	Homo sampiens
ENCFF000ZHU	ENCBS067ENC	ENCSR000DOR	E2F4-human	EFO:0001200	MCF 10A	immortalized cell line	Homo sampiens
ENCFF598IGX	ENCBS067ENC	ENCSR000DOR	E2F4-human	EFO:0001200	MCF 10A	immortalized cell line	Homo sampiens
ENCFF405SQS	ENCBS067ENC	ENCSR000DOR	E2F4-human	EFO:0001200	MCF 10A	immortalized cell line	Homo sampiens
ENCFF000VUG	ENCBS630AAA	ENCSR000DYY	E2F4-human	EFO:0002784	GM12878	immortalized cell line	Homo sampiens
ENCFF000VUH	ENCBS630AAA	ENCSR000DYY	E2F4-human	EFO:0002784	GM12878	immortalized cell line	Homo sampiens
ENCFF000XDB	ENCBS500SDW	ENCSR000EVL	E2F4-human	EFO:0002791	HeLa-S3	immortalized cell line	Homo sampiens
ENCFF000XDC	ENCBS500SDW	ENCSR000EVL	E2F4-human	EFO:0002791	HeLa-S3	immortalized cell line	Homo sampiens
ENCFF000YMD	ENCBS667AAA	ENCSR000EWL	E2F4-human	EFO:0002067	K562	immortalized cell line	Homo sampiens
ENCFF000YMG	ENCBS667AAA	ENCSR000EWL	E2F4-human	EFO:0002067	K562	immortalized cell line	Homo sampiens
ENCFF246JDQ	ENCBS667AAA	ENCSR000EWL	E2F4-human	EFO:0002067	K562	immortalized cell line	Homo sampiens
ENCFF125MPD	ENCBS667AAA	ENCSR000EWL	E2F4-human	EFO:0002067	K562	immortalized cell line	Homo sampiens
ENCFF000ONV	ENCBS111ENC	ENCSR000BSI	E2F6-human	EFO:0003042	H1-hESC	stem cell	Homo sampiens
ENCFF000ONW	ENCBS111ENC	ENCSR000BSI	E2F6-human	EFO:0003042	H1-hESC	stem cell	Homo sampiens
ENCFF000MYI	ENCBS164AAA	ENCSR000BTC	E2F6-human	EFO:0001086	A549	immortalized cell line	Homo sampiens
ENCFF000MYM	ENCBS164AAA	ENCSR000BTC	E2F6-human	EFO:0001086	A549	immortalized cell line	Homo sampiens
ENCFF000PYL	ENCBS109ENC	ENCSR000BLI	E2F6-human	EFO:0002067	K562	immortalized cell line	Homo sampiens
ENCFF000PYO	ENCBS109ENC	ENCSR000BLI	E2F6-human	EFO:0002067	K562	immortalized cell line	Homo sampiens
ENCFF032EXY	ENCBS109ENC	ENCSR000BLI	E2F6-human	EFO:0002067	K562	immortalized cell line	Homo sampiens
ENCFF620AHU	ENCBS109ENC	ENCSR000BLI	E2F6-human	EFO:0002067	K562	immortalized cell line	Homo sampiens
ENCFF000XDH	ENCBS500SDW	ENCSR000EVK	E2F6-human	EFO:0002791	HeLa-S3	immortalized cell line	Homo sampiens
ENCFF000XDI	ENCBS500SDW	ENCSR000EVK	E2F6-human	EFO:0002791	HeLa-S3	immortalized cell line	Homo sampiens
ENCFF000YMH	ENCBS667AAA	ENCSR000EWJ	E2F6-human	EFO:0002067	K562	immortalized cell line	Homo sampiens
ENCFF000YML	ENCBS667AAA	ENCSR000EWJ	E2F6-human	EFO:0002067	K562	immortalized cell line	Homo sampiens
ENCFF000VUQ	ENCBS630AAA	ENCSR000DZQ	EBF1-human	EFO:0002784	GM12878	immortalized cell line	Homo sampiens
ENCFF000VUS	ENCBS630AAA	ENCSR000DZQ	EBF1-human	EFO:0002784	GM12878	immortalized cell line	Homo sampiens
ENCFF000NUE	ENCBS110ENC	ENCSR000BGU	EBF1-human	EFO:0002784	GM12878	immortalized cell line	Homo sampiens
ENCFF000NUG	ENCBS110ENC	ENCSR000BGU	EBF1-human	EFO:0002784	GM12878	immortalized cell line	Homo sampiens
ENCFF336DPP	ENCBS110ENC	ENCSR000BGU	EBF1-human	EFO:0002784	GM12878	immortalized cell line	Homo sampiens
ENCFF069CYJ	ENCBS110ENC	ENCSR000BGU	EBF1-human	EFO:0002784	GM12878	immortalized cell line	Homo sampiens
ENCFF262KHM	ENCBS057BBL	ENCSR199WXF	EED-human	EFO:0002784	GM12878	immortalized cell line	Homo sampiens
ENCFF437VCI	ENCBS083XJQ	ENCSR199WXF	EED-human	EFO:0002784	GM12878	immortalized cell line	Homo sampiens
ENCFF479XRX	ENCBS995QNX	ENCSR440VKE	eGFP-ADNP-human	EFO:0002067	K562	immortalized cell line	Homo sampiens
ENCFF783CXK	ENCBS037KCN	ENCSR440VKE	eGFP-ADNP-human	EFO:0002067	K562	immortalized cell line	Homo sampiens
ENCFF304KBG	ENCBS638MCL	ENCSR769JRS	eGFP-AEBP2-human	EFO:0001182	HEK293	immortalized cell line	Homo sampiens
ENCFF851EXP	ENCBS715MMR	ENCSR769JRS	eGFP-AEBP2-human	EFO:0001182	HEK293	immortalized cell line	Homo sampiens
ENCFF800DAY	ENCBS405AAA	ENCSR091GVJ	eGFP-ATF1-human	EFO:0002067	K562	immortalized cell line	Homo sampiens
ENCFF465GPJ	ENCBS377AAA	ENCSR091GVJ	eGFP-ATF1-human	EFO:0002067	K562	immortalized cell line	Homo sampiens
ENCFF201XXY	ENCBS818PXJ	ENCSR217HTK	eGFP-ATF2-human	EFO:0001182	HEK293	immortalized cell line	Homo sampiens
ENCFF182IWX	ENCBS268PXW	ENCSR217HTK	eGFP-ATF2-human	EFO:0001182	HEK293	immortalized cell line	Homo sampiens
ENCFF228QPG	ENCBS397AAA	ENCSR632DCH	eGFP-ATF3-human	EFO:0002067	K562	immortalized cell line	Homo sampiens
ENCFF102OVJ	ENCBS458AAA	ENCSR632DCH	eGFP-ATF3-human	EFO:0002067	K562	immortalized cell line	Homo sampiens
ENCFF220WDD	ENCBS083LQN	ENCSR740NPG	eGFP-BACH1-human	EFO:0002067	K562	immortalized cell line	Homo sampiens
ENCFF812HBY	ENCBS746PBJ	ENCSR740NPG	eGFP-BACH1-human	EFO:0002067	K562	immortalized cell line	Homo sampiens
ENCFF004XRU	ENCBS541ZKU	ENCSR021DJC	eGFP-BCL11A-human	EFO:0001182	HEK293	immortalized cell line	Homo sampiens
ENCFF802VUL	ENCBS941THM	ENCSR021DJC	eGFP-BCL11A-human	EFO:0001182	HEK293	immortalized cell line	Homo sampiens
ENCFF987CVS	ENCBS395FBP	ENCSR770PQN	eGFP-BCL11B-human	EFO:0001182	HEK293	immortalized cell line	Homo sampiens
ENCFF742YPV	ENCBS923OML	ENCSR770PQN	eGFP-BCL11B-human	EFO:0001182	HEK293	immortalized cell line	Homo sampiens
ENCFF014ABI	ENCBS378AAA	ENCSR416QLJ	eGFP-CEBPB-human	EFO:0002067	K562	immortalized cell line	Homo sampiens
ENCFF951SEJ	ENCBS406AAA	ENCSR416QLJ	eGFP-CEBPB-human	EFO:0002067	K562	immortalized cell line	Homo sampiens
ENCFF877WMR	ENCBS787WNX	ENCSR094ZCF	eGFP-CEBPG-human	EFO:0001203	MCF-7	immortalized cell line	Homo sampiens
ENCFF471EXM	ENCBS948XBF	ENCSR094ZCF	eGFP-CEBPG-human	EFO:0001203	MCF-7	immortalized cell line	Homo sampiens
ENCFF310DOA	ENCBS760ONP	ENCSR620VIC	eGFP-CEBPG-human	EFO:0002067	K562	immortalized cell line	Homo sampiens
ENCFF303OOS	ENCBS054WRH	ENCSR620VIC	eGFP-CEBPG-human	EFO:0002067	K562	immortalized cell line	Homo sampiens
ENCFF678WSG	ENCBS411NIF	ENCSR093FKD	eGFP-CREB3-human	EFO:0002067	K562	immortalized cell line	Homo sampiens
ENCFF252BPD	ENCBS312MPK	ENCSR093FKD	eGFP-CREB3-human	EFO:0002067	K562	immortalized cell line	Homo sampiens
ENCFF954JCE	ENCBS454VNJ	ENCSR617IFZ	eGFP-CTCF-human	EFO:0001182	HEK293	immortalized cell line	Homo sampiens
ENCFF799SDQ	ENCBS268XWC	ENCSR617IFZ	eGFP-CTCF-human	EFO:0001182	HEK293	immortalized cell line	Homo sampiens
ENCFF107DVQ	ENCBS544POC	ENCSR178NTX	eGFP-CUX1-human	EFO:0002067	K562	immortalized cell line	Homo sampiens
ENCFF121MMO	ENCBS613PZU	ENCSR178NTX	eGFP-CUX1-human	EFO:0002067	K562	immortalized cell line	Homo sampiens
ENCFF089EVB	ENCBS216ZMH	ENCSR382AIB	eGFP-DDX20-human	EFO:0002067	K562	immortalized cell line	Homo sampiens
ENCFF180RGQ	ENCBS196WDN	ENCSR382AIB	eGFP-DDX20-human	EFO:0002067	K562	immortalized cell line	Homo sampiens
ENCFF013WTE	ENCBS197ROV	ENCSR167JBG	eGFP-DIDO1-human	EFO:0002067	K562	immortalized cell line	Homo sampiens
ENCFF845UEU	ENCBS454ZTQ	ENCSR167JBG	eGFP-DIDO1-human	EFO:0002067	K562	immortalized cell line	Homo sampiens
ENCFF087PBL	ENCBS742UIG	ENCSR505NMN	eGFP-E2F4-human	EFO:0001203	MCF-7	immortalized cell line	Homo sampiens
ENCFF169QDL	ENCBS452IKC	ENCSR505NMN	eGFP-E2F4-human	EFO:0001203	MCF-7	immortalized cell line	Homo sampiens
ENCFF938KSJ	ENCBS925NOW	ENCSR709DRM	eGFP-E2F5-human	EFO:0002067	K562	immortalized cell line	Homo sampiens
ENCFF642OQJ	ENCBS165WTA	ENCSR709DRM	eGFP-E2F5-human	EFO:0002067	K562	immortalized cell line	Homo sampiens
ENCFF179UQW	ENCBS738RNR	ENCSR919CZU	eGFP-EGR2-human	EFO:0001182	HEK293	immortalized cell line	Homo sampiens
ENCFF811OMJ	ENCBS970WCY	ENCSR919CZU	eGFP-EGR2-human	EFO:0001182	HEK293	immortalized cell line	Homo sampiens
ENCFF708IMW	ENCBS377JBD	ENCSR475SOC	eGFP-ELF1-human	EFO:0001203	MCF-7	immortalized cell line	Homo sampiens
ENCFF509LLL	ENCBS580NZH	ENCSR475SOC	eGFP-ELF1-human	EFO:0001203	MCF-7	immortalized cell line	Homo sampiens
ENCFF775ZRK	ENCBS861JYZ	ENCSR975SSR	eGFP-ELF1-human	EFO:0002067	K562	immortalized cell line	Homo sampiens
ENCFF702YSS	ENCBS872CIK	ENCSR975SSR	eGFP-ELF1-human	EFO:0002067	K562	immortalized cell line	Homo sampiens
ENCFF709ODW	ENCBS168TVX	ENCSR338QAC	eGFP-ELK1-human	EFO:0002067	K562	immortalized cell line	Homo sampiens
ENCFF847POA	ENCBS996OLB	ENCSR338QAC	eGFP-ELK1-human	EFO:0002067	K562	immortalized cell line	Homo sampiens
ENCFF746MMS	ENCBS413AAA	ENCSR596IKD	eGFP-ETS2-human	EFO:0002067	K562	immortalized cell line	Homo sampiens
ENCFF968SMN	ENCBS381AAA	ENCSR596IKD	eGFP-ETS2-human	EFO:0002067	K562	immortalized cell line	Homo sampiens
ENCFF956MXT	ENCBS398XYI	ENCSR277DMR	eGFP-ETV1-human	EFO:0002067	K562	immortalized cell line	Homo sampiens
ENCFF134DGA	ENCBS750HFY	ENCSR277DMR	eGFP-ETV1-human	EFO:0002067	K562	immortalized cell line	Homo sampiens
ENCFF759NKM	ENCBS945GDK	ENCSR827NWO	eGFP-FEZF1-human	EFO:0001182	HEK293	immortalized cell line	Homo sampiens
ENCFF004WBX	ENCBS416NEJ	ENCSR827NWO	eGFP-FEZF1-human	EFO:0001182	HEK293	immortalized cell line	Homo sampiens
ENCFF000ZTM		ENCSR000DKB	eGFP-FOS-human	EFO:0002067	K562	immortalized cell line	Homo sampiens
ENCFF000ZTS		ENCSR000DKB	eGFP-FOS-human	EFO:0002067	K562	immortalized cell line	Homo sampiens
ENCFF000ZTT		ENCSR000DKB	eGFP-FOS-human	EFO:0002067	K562	immortalized cell line	Homo sampiens
ENCFF306DQB	ENCBS799VSJ	ENCSR000DKB	eGFP-FOS-human	EFO:0002067	K562	immortalized cell line	Homo sampiens
ENCFF827RTF	ENCBS607WST	ENCSR000DKB	eGFP-FOS-human	EFO:0002067	K562	immortalized cell line	Homo sampiens
ENCFF318ENI	ENCBS366WZA	ENCSR000DKB	eGFP-FOS-human	EFO:0002067	K562	immortalized cell line	Homo sampiens
ENCFF541WBX	ENCBS894HTX	ENCSR239ZLZ	eGFP-FOSL1-human	EFO:0002067	K562	immortalized cell line	Homo sampiens
ENCFF084TWW	ENCBS129EER	ENCSR239ZLZ	eGFP-FOSL1-human	EFO:0002067	K562	immortalized cell line	Homo sampiens
ENCFF946OHC	ENCBS829WBT	ENCSR546KCN	eGFP-FOSL2-human	EFO:0001203	MCF-7	immortalized cell line	Homo sampiens
ENCFF873PTI	ENCBS948MKG	ENCSR546KCN	eGFP-FOSL2-human	EFO:0001203	MCF-7	immortalized cell line	Homo sampiens
ENCFF268SHC	ENCBS032TNV	ENCSR847LBF	eGFP-FOXJ2-human	EFO:0002067	K562	immortalized cell line	Homo sampiens
ENCFF878ETO	ENCBS039TGQ	ENCSR847LBF	eGFP-FOXJ2-human	EFO:0002067	K562	immortalized cell line	Homo sampiens
ENCFF772DPI	ENCBS021UXC	ENCSR290MUH	eGFP-GABPA-human	EFO:0002067	K562	immortalized cell line	Homo sampiens
ENCFF009ZXV	ENCBS084QBR	ENCSR290MUH	eGFP-GABPA-human	EFO:0002067	K562	immortalized cell line	Homo sampiens
ENCFF862PGC	ENCBS980KNO	ENCSR038RXU	eGFP-GABPA-human	EFO:0001203	MCF-7	immortalized cell line	Homo sampiens
ENCFF768AST	ENCBS368ZAX	ENCSR038RXU	eGFP-GABPA-human	EFO:0001203	MCF-7	immortalized cell line	Homo sampiens
ENCFF000ZTV		ENCSR000DKA	eGFP-GATA2-human	EFO:0002067	K562	immortalized cell line	Homo sampiens
ENCFF000ZTX		ENCSR000DKA	eGFP-GATA2-human	EFO:0002067	K562	immortalized cell line	Homo sampiens
ENCFF479NOE	ENCBS746ASY	ENCSR000DKA	eGFP-GATA2-human	EFO:0002067	K562	immortalized cell line	Homo sampiens
ENCFF237CLM	ENCBS903OXA	ENCSR000DKA	eGFP-GATA2-human	EFO:0002067	K562	immortalized cell line	Homo sampiens
ENCFF560UCX	ENCBS321IHW	ENCSR445PDR	eGFP-GFI1B-human	EFO:0001182	HEK293	immortalized cell line	Homo sampiens
ENCFF181SRH	ENCBS320GSB	ENCSR445PDR	eGFP-GFI1B-human	EFO:0001182	HEK293	immortalized cell line	Homo sampiens
ENCFF091YMR	ENCBS601JDX	ENCSR211PZO	eGFP-GLI4-human	EFO:0001182	HEK293	immortalized cell line	Homo sampiens
ENCFF632BDC	ENCBS966YJO	ENCSR211PZO	eGFP-GLI4-human	EFO:0001182	HEK293	immortalized cell line	Homo sampiens
ENCFF604MCO	ENCBS695XFP	ENCSR482BBZ	eGFP-GLIS1-human	EFO:0001182	HEK293	immortalized cell line	Homo sampiens
ENCFF105YMD	ENCBS300BBW	ENCSR482BBZ	eGFP-GLIS1-human	EFO:0001182	HEK293	immortalized cell line	Homo sampiens
ENCFF723EYG	ENCBS627NYN	ENCSR535DIA	eGFP-GLIS2-human	EFO:0001182	HEK293	immortalized cell line	Homo sampiens
ENCFF617GJF	ENCBS101WTD	ENCSR535DIA	eGFP-GLIS2-human	EFO:0001182	HEK293	immortalized cell line	Homo sampiens
ENCFF357MEA	ENCBS656LOQ	ENCSR801RPW	eGFP-GTF2A2-human	EFO:0002067	K562	immortalized cell line	Homo sampiens
ENCFF658DNV	ENCBS839DWI	ENCSR801RPW	eGFP-GTF2A2-human	EFO:0002067	K562	immortalized cell line	Homo sampiens
ENCFF845ZLZ	ENCBS936ECY	ENCSR532KTI	eGFP-GTF2E2-human	EFO:0002067	K562	immortalized cell line	Homo sampiens
ENCFF552USH	ENCBS182OZC	ENCSR532KTI	eGFP-GTF2E2-human	EFO:0002067	K562	immortalized cell line	Homo sampiens
ENCFF000ZTZ		ENCSR000DJZ	eGFP-HDAC8-human	EFO:0002067	K562	immortalized cell line	Homo sampiens
ENCFF000ZUF		ENCSR000DJZ	eGFP-HDAC8-human	EFO:0002067	K562	immortalized cell line	Homo sampiens
ENCFF788FFM	ENCBS055CUX	ENCSR000DJZ	eGFP-HDAC8-human	EFO:0002067	K562	immortalized cell line	Homo sampiens
ENCFF721IXJ	ENCBS903WFV	ENCSR000DJZ	eGFP-HDAC8-human	EFO:0002067	K562	immortalized cell line	Homo sampiens
ENCFF107MLR	ENCBS422AAA	ENCSR835TCD	eGFP-HDAC8-human	EFO:0002067	K562	immortalized cell line	Homo sampiens
ENCFF301KAZ	ENCBS383AAA	ENCSR835TCD	eGFP-HDAC8-human	EFO:0002067	K562	immortalized cell line	Homo sampiens
ENCFF654MCA	ENCBS237PTC	ENCSR803GYT	eGFP-HIC1-human	EFO:0001182	HEK293	immortalized cell line	Homo sampiens
ENCFF410VAL	ENCBS633JQE	ENCSR803GYT	eGFP-HIC1-human	EFO:0001182	HEK293	immortalized cell line	Homo sampiens
ENCFF290VXO	ENCBS436RZW	ENCSR619GFP	eGFP-HINFP-human	EFO:0002067	K562	immortalized cell line	Homo sampiens
ENCFF311MHB	ENCBS595XIW	ENCSR619GFP	eGFP-HINFP-human	EFO:0002067	K562	immortalized cell line	Homo sampiens
ENCFF891JES	ENCBS384AAA	ENCSR005NMT	eGFP-ID3-human	EFO:0002067	K562	immortalized cell line	Homo sampiens
ENCFF614AZS	ENCBS425AAA	ENCSR005NMT	eGFP-ID3-human	EFO:0002067	K562	immortalized cell line	Homo sampiens
ENCFF234PKC	ENCBS428AAA	ENCSR648INT	eGFP-ILK-human	EFO:0002067	K562	immortalized cell line	Homo sampiens
ENCFF676IGA	ENCBS076AAA	ENCSR648INT	eGFP-ILK-human	EFO:0002067	K562	immortalized cell line	Homo sampiens
ENCFF438VAZ	ENCBS121NOF	ENCSR382GSF	eGFP-INSM2-human	EFO:0001182	HEK293	immortalized cell line	Homo sampiens
ENCFF399JID	ENCBS748WVG	ENCSR382GSF	eGFP-INSM2-human	EFO:0001182	HEK293	immortalized cell line	Homo sampiens
ENCFF602FUW	ENCBS429AAA	ENCSR854MCV	eGFP-IRF1-human	EFO:0002067	K562	immortalized cell line	Homo sampiens
ENCFF559EGU	ENCBS385AAA	ENCSR854MCV	eGFP-IRF1-human	EFO:0002067	K562	immortalized cell line	Homo sampiens
ENCFF090MZL	ENCBS264ETB	ENCSR926KTP	eGFP-IRF9-human	EFO:0002067	K562	immortalized cell line	Homo sampiens
ENCFF572JRO	ENCBS951JJK	ENCSR926KTP	eGFP-IRF9-human	EFO:0002067	K562	immortalized cell line	Homo sampiens
ENCFF000ZUH		ENCSR000DJY	eGFP-JUNB-human	EFO:0002067	K562	immortalized cell line	Homo sampiens
ENCFF000ZUJ		ENCSR000DJY	eGFP-JUNB-human	EFO:0002067	K562	immortalized cell line	Homo sampiens
ENCFF999MCN	ENCBS775URE	ENCSR000DJY	eGFP-JUNB-human	EFO:0002067	K562	immortalized cell line	Homo sampiens
ENCFF418UEC	ENCBS353XCU	ENCSR000DJY	eGFP-JUNB-human	EFO:0002067	K562	immortalized cell line	Homo sampiens
ENCFF000ZUN		ENCSR000DJX	eGFP-JUND-human	EFO:0002067	K562	immortalized cell line	Homo sampiens
ENCFF000ZUP		ENCSR000DJX	eGFP-JUND-human	EFO:0002067	K562	immortalized cell line	Homo sampiens
ENCFF000ZUT		ENCSR000DJX	eGFP-JUND-human	EFO:0002067	K562	immortalized cell line	Homo sampiens
ENCFF529VEA	ENCBS919IGK	ENCSR000DJX	eGFP-JUND-human	EFO:0002067	K562	immortalized cell line	Homo sampiens
ENCFF823BYH	ENCBS770RPE	ENCSR000DJX	eGFP-JUND-human	EFO:0002067	K562	immortalized cell line	Homo sampiens
ENCFF164CZG	ENCBS349TGF	ENCSR000DJX	eGFP-JUND-human	EFO:0002067	K562	immortalized cell line	Homo sampiens
ENCFF708ZXK	ENCBS078AAA	ENCSR608HVP	eGFP-KLF13-human	EFO:0002067	K562	immortalized cell line	Homo sampiens
ENCFF169LKQ	ENCBS432AAA	ENCSR608HVP	eGFP-KLF13-human	EFO:0002067	K562	immortalized cell line	Homo sampiens
ENCFF658SBL	ENCBS485LHG	ENCSR065WUF	eGFP-KLF17-human	EFO:0001182	HEK293	immortalized cell line	Homo sampiens
ENCFF081WJA	ENCBS328EZX	ENCSR065WUF	eGFP-KLF17-human	EFO:0001182	HEK293	immortalized cell line	Homo sampiens
ENCFF929AIJ	ENCBS386AAA	ENCSR550HCT	eGFP-KLF1-human	EFO:0002067	K562	immortalized cell line	Homo sampiens
ENCFF630NYB	ENCBS431AAA	ENCSR550HCT	eGFP-KLF1-human	EFO:0002067	K562	immortalized cell line	Homo sampiens
ENCFF827QKJ	ENCBS870ICB	ENCSR859BMR	eGFP-KLF1-human	EFO:0001182	HEK293	immortalized cell line	Homo sampiens
ENCFF388FXV	ENCBS211CSP	ENCSR859BMR	eGFP-KLF1-human	EFO:0001182	HEK293	immortalized cell line	Homo sampiens
ENCFF965ZXK	ENCBS949BEW	ENCSR265WJC	eGFP-KLF4-human	EFO:0001203	MCF-7	immortalized cell line	Homo sampiens
ENCFF772MDW	ENCBS984RGW	ENCSR265WJC	eGFP-KLF4-human	EFO:0001203	MCF-7	immortalized cell line	Homo sampiens
ENCFF120PSC	ENCBS184IBZ	ENCSR604VWJ	eGFP-KLF7-human	EFO:0001182	HEK293	immortalized cell line	Homo sampiens
ENCFF213KHA	ENCBS079LXY	ENCSR604VWJ	eGFP-KLF7-human	EFO:0001182	HEK293	immortalized cell line	Homo sampiens
ENCFF125BUA	ENCBS132UZL	ENCSR635NOQ	eGFP-KLF8-human	EFO:0001182	HEK293	immortalized cell line	Homo sampiens
ENCFF573RBP	ENCBS960DYO	ENCSR635NOQ	eGFP-KLF8-human	EFO:0001182	HEK293	immortalized cell line	Homo sampiens
ENCFF544NMW	ENCBS180ROE	ENCSR125ZYC	eGFP-KLF9-human	EFO:0001203	MCF-7	immortalized cell line	Homo sampiens
ENCFF812ESP	ENCBS418UGY	ENCSR125ZYC	eGFP-KLF9-human	EFO:0001203	MCF-7	immortalized cell line	Homo sampiens
ENCFF424DRA	ENCBS659BWP	ENCSR076EZB	eGFP-KLF9-human	EFO:0001182	HEK293	immortalized cell line	Homo sampiens
ENCFF063SNY	ENCBS321GAS	ENCSR076EZB	eGFP-KLF9-human	EFO:0001182	HEK293	immortalized cell line	Homo sampiens
ENCFF308BKD	ENCBS584ZNF	ENCSR818DQV	eGFP-MAFG-human	EFO:0002067	K562	immortalized cell line	Homo sampiens
ENCFF743FRI	ENCBS062KUE	ENCSR818DQV	eGFP-MAFG-human	EFO:0002067	K562	immortalized cell line	Homo sampiens
ENCFF607CWP	ENCBS099PTU	ENCSR290SSQ	eGFP-MAZ-human	EFO:0001182	HEK293	immortalized cell line	Homo sampiens
ENCFF545NUA	ENCBS541TCN	ENCSR290SSQ	eGFP-MAZ-human	EFO:0001182	HEK293	immortalized cell line	Homo sampiens
ENCFF124TQP	ENCBS902TFF	ENCSR647ZXA	eGFP-MEF2D-human	EFO:0002067	K562	immortalized cell line	Homo sampiens
ENCFF132XOC	ENCBS163FHT	ENCSR647ZXA	eGFP-MEF2D-human	EFO:0002067	K562	immortalized cell line	Homo sampiens
ENCFF297BVZ	ENCBS187WDU	ENCSR707BNG	eGFP-MYNN-human	EFO:0001182	HEK293	immortalized cell line	Homo sampiens
ENCFF864CXQ	ENCBS898VIL	ENCSR707BNG	eGFP-MYNN-human	EFO:0001182	HEK293	immortalized cell line	Homo sampiens
ENCFF653FYP	ENCBS085AAA	ENCSR552YGL	eGFP-NFE2-human	EFO:0002067	K562	immortalized cell line	Homo sampiens
ENCFF497VZQ	ENCBS443AAA	ENCSR552YGL	eGFP-NFE2-human	EFO:0002067	K562	immortalized cell line	Homo sampiens
ENCFF290OJO	ENCBS500RHB	ENCSR557PSD	eGFP-NFE2L1-human	EFO:0002067	K562	immortalized cell line	Homo sampiens
ENCFF038IFQ	ENCBS108AEM	ENCSR557PSD	eGFP-NFE2L1-human	EFO:0002067	K562	immortalized cell line	Homo sampiens
ENCFF612OEV	ENCBS151LVY	ENCSR632SHZ	eGFP-NFE2L1-human	EFO:0002067	K562	immortalized cell line	Homo sampiens
ENCFF248TDS	ENCBS378YNT	ENCSR632SHZ	eGFP-NFE2L1-human	EFO:0002067	K562	immortalized cell line	Homo sampiens
ENCFF446UOL	ENCBS707WFI	ENCSR178DEG	eGFP-NR2C1-human	EFO:0002067	K562	immortalized cell line	Homo sampiens
ENCFF845MTL	ENCBS706YBL	ENCSR178DEG	eGFP-NR2C1-human	EFO:0002067	K562	immortalized cell line	Homo sampiens
ENCFF632XPI	ENCBS706YBL	ENCSR178DEG	eGFP-NR2C1-human	EFO:0002067	K562	immortalized cell line	Homo sampiens
ENCFF748QNI	ENCBS707WFI	ENCSR178DEG	eGFP-NR2C1-human	EFO:0002067	K562	immortalized cell line	Homo sampiens
ENCFF961GDC	ENCBS168GXP	ENCSR750LYM	eGFP-NR2C2-human	EFO:0002067	K562	immortalized cell line	Homo sampiens
ENCFF606YNV	ENCBS250NTO	ENCSR750LYM	eGFP-NR2C2-human	EFO:0002067	K562	immortalized cell line	Homo sampiens
ENCFF000ZUX		ENCSR000DJW	eGFP-NR4A1-human	EFO:0002067	K562	immortalized cell line	Homo sampiens
ENCFF000ZUY		ENCSR000DJW	eGFP-NR4A1-human	EFO:0002067	K562	immortalized cell line	Homo sampiens
ENCFF108WAD	ENCBS875VQC	ENCSR000DJW	eGFP-NR4A1-human	EFO:0002067	K562	immortalized cell line	Homo sampiens
ENCFF387PPQ	ENCBS715EUG	ENCSR000DJW	eGFP-NR4A1-human	EFO:0002067	K562	immortalized cell line	Homo sampiens
ENCFF946QHS	ENCBS392AAA	ENCSR130PDE	eGFP-NR4A1-human	EFO:0002067	K562	immortalized cell line	Homo sampiens
ENCFF926NTQ	ENCBS445AAA	ENCSR130PDE	eGFP-NR4A1-human	EFO:0002067	K562	immortalized cell line	Homo sampiens
ENCFF031HZQ	ENCBS582ZUH	ENCSR324LTM	eGFP-OSR2-human	EFO:0001182	HEK293	immortalized cell line	Homo sampiens
ENCFF097LQF	ENCBS927YCP	ENCSR324LTM	eGFP-OSR2-human	EFO:0001182	HEK293	immortalized cell line	Homo sampiens
ENCFF938VGO	ENCBS294AQJ	ENCSR768LIO	eGFP-OVOL3-human	EFO:0001182	HEK293	immortalized cell line	Homo sampiens
ENCFF607AVR	ENCBS465UQI	ENCSR768LIO	eGFP-OVOL3-human	EFO:0001182	HEK293	immortalized cell line	Homo sampiens
ENCFF818PEY	ENCBS577WIH	ENCSR966ULI	eGFP-PATZ1-human	EFO:0001182	HEK293	immortalized cell line	Homo sampiens
ENCFF847GYW	ENCBS186LSD	ENCSR966ULI	eGFP-PATZ1-human	EFO:0001182	HEK293	immortalized cell line	Homo sampiens
ENCFF373IJK	ENCBS655BEX	ENCSR263DFP	eGFP-PBX2-human	EFO:0002067	K562	immortalized cell line	Homo sampiens
ENCFF810SIO	ENCBS860ULO	ENCSR263DFP	eGFP-PBX2-human	EFO:0002067	K562	immortalized cell line	Homo sampiens
ENCFF658ADO	ENCBS188WMP	ENCSR400FSM	eGFP-POLR2H-human	EFO:0002067	K562	immortalized cell line	Homo sampiens
ENCFF800BIH	ENCBS420IWT	ENCSR400FSM	eGFP-POLR2H-human	EFO:0002067	K562	immortalized cell line	Homo sampiens
ENCFF424HAO	ENCBS002NWR	ENCSR223TAV	eGFP-PRDM10-human	EFO:0001182	HEK293	immortalized cell line	Homo sampiens
ENCFF541OLW	ENCBS154XJI	ENCSR223TAV	eGFP-PRDM10-human	EFO:0001182	HEK293	immortalized cell line	Homo sampiens
ENCFF027SPN	ENCBS568ALT	ENCSR760AAY	eGFP-PRDM12-human	EFO:0001182	HEK293	immortalized cell line	Homo sampiens
ENCFF092BEM	ENCBS395UVF	ENCSR760AAY	eGFP-PRDM12-human	EFO:0001182	HEK293	immortalized cell line	Homo sampiens
ENCFF847CAU	ENCBS153AXP	ENCSR098YLE	eGFP-PRDM1-human	EFO:0001182	HEK293	immortalized cell line	Homo sampiens
ENCFF180VNC	ENCBS830CXI	ENCSR098YLE	eGFP-PRDM1-human	EFO:0001182	HEK293	immortalized cell line	Homo sampiens
ENCFF485GAK	ENCBS077EHF	ENCSR714LYA	eGFP-PRDM2-human	EFO:0001182	HEK293	immortalized cell line	Homo sampiens
ENCFF099KPK	ENCBS410VFQ	ENCSR714LYA	eGFP-PRDM2-human	EFO:0001182	HEK293	immortalized cell line	Homo sampiens
ENCFF623SOH	ENCBS269DNN	ENCSR443MVV	eGFP-PRDM4-human	EFO:0001182	HEK293	immortalized cell line	Homo sampiens
ENCFF946UWI	ENCBS090OPS	ENCSR443MVV	eGFP-PRDM4-human	EFO:0001182	HEK293	immortalized cell line	Homo sampiens
ENCFF024MPE	ENCBS931QBF	ENCSR126FZN	eGFP-PTRF-human	EFO:0002067	K562	immortalized cell line	Homo sampiens
ENCFF866OLR	ENCBS258BIP	ENCSR126FZN	eGFP-PTRF-human	EFO:0002067	K562	immortalized cell line	Homo sampiens
ENCFF860REV	ENCBS430AYP	ENCSR314BBS	eGFP-PTTG1-human	EFO:0002067	K562	immortalized cell line	Homo sampiens
ENCFF400FDW	ENCBS473LEX	ENCSR314BBS	eGFP-PTTG1-human	EFO:0002067	K562	immortalized cell line	Homo sampiens
ENCFF137WND	ENCBS203NBV	ENCSR410DWC	eGFP-PYGO2-human	EFO:0002067	K562	immortalized cell line	Homo sampiens
ENCFF180VYU	ENCBS102NQC	ENCSR410DWC	eGFP-PYGO2-human	EFO:0002067	K562	immortalized cell line	Homo sampiens
ENCFF170JGP	ENCBS758JEW	ENCSR441UBA	eGFP-RBAK-human	EFO:0001182	HEK293	immortalized cell line	Homo sampiens
ENCFF324LWS	ENCBS826GBM	ENCSR441UBA	eGFP-RBAK-human	EFO:0001182	HEK293	immortalized cell line	Homo sampiens
ENCFF904PIO	ENCBS450AAA	ENCSR772EEN	eGFP-RELA-human	EFO:0002067	K562	immortalized cell line	Homo sampiens
ENCFF070QUN	ENCBS394AAA	ENCSR772EEN	eGFP-RELA-human	EFO:0002067	K562	immortalized cell line	Homo sampiens
ENCFF130LXW	ENCBS064MAI	ENCSR896UBV	eGFP-REST-human	EFO:0001182	HEK293	immortalized cell line	Homo sampiens
ENCFF975JDZ	ENCBS988LBI	ENCSR896UBV	eGFP-REST-human	EFO:0001182	HEK293	immortalized cell line	Homo sampiens
ENCFF053WUE	ENCBS308KSJ	ENCSR041ZIQ	eGFP-SALL1-human	EFO:0001182	HEK293	immortalized cell line	Homo sampiens
ENCFF151XJE	ENCBS933NCW	ENCSR041ZIQ	eGFP-SALL1-human	EFO:0001182	HEK293	immortalized cell line	Homo sampiens
ENCFF338OPD	ENCBS869DNC	ENCSR605MGM	eGFP-SCRT1-human	EFO:0001182	HEK293	immortalized cell line	Homo sampiens
ENCFF642PIG	ENCBS570HPC	ENCSR605MGM	eGFP-SCRT1-human	EFO:0001182	HEK293	immortalized cell line	Homo sampiens
ENCFF541CNR	ENCBS843XAC	ENCSR338DGO	eGFP-SCRT2-human	EFO:0001182	HEK293	immortalized cell line	Homo sampiens
ENCFF579WVJ	ENCBS969EIC	ENCSR338DGO	eGFP-SCRT2-human	EFO:0001182	HEK293	immortalized cell line	Homo sampiens
ENCFF083HMM	ENCBS525GEV	ENCSR807LQP	eGFP-SP2-human	EFO:0001182	HEK293	immortalized cell line	Homo sampiens
ENCFF360KGZ	ENCBS974ABS	ENCSR807LQP	eGFP-SP2-human	EFO:0001182	HEK293	immortalized cell line	Homo sampiens
ENCFF343RSJ	ENCBS227SEC	ENCSR141PZA	eGFP-SP3-human	EFO:0001182	HEK293	immortalized cell line	Homo sampiens
ENCFF923TZZ	ENCBS451MRF	ENCSR141PZA	eGFP-SP3-human	EFO:0001182	HEK293	immortalized cell line	Homo sampiens
ENCFF528XYJ	ENCBS983QBQ	ENCSR468IJT	eGFP-SP7-human	EFO:0001182	HEK293	immortalized cell line	Homo sampiens
ENCFF423BHL	ENCBS516AIH	ENCSR468IJT	eGFP-SP7-human	EFO:0001182	HEK293	immortalized cell line	Homo sampiens
ENCFF373VCV	ENCBS360JZL	ENCSR671GFC	eGFP-TAF7-human	EFO:0002067	K562	immortalized cell line	Homo sampiens
ENCFF124VCI	ENCBS115OID	ENCSR671GFC	eGFP-TAF7-human	EFO:0002067	K562	immortalized cell line	Homo sampiens
ENCFF578CTB	ENCBS723GLY	ENCSR635GTR	eGFP-TEAD2-human	EFO:0002067	K562	immortalized cell line	Homo sampiens
ENCFF197TMV	ENCBS528ZIT	ENCSR635GTR	eGFP-TEAD2-human	EFO:0002067	K562	immortalized cell line	Homo sampiens
ENCFF488CVL	ENCBS931GIA	ENCSR017GBO	eGFP-TFDP1-human	EFO:0002067	K562	immortalized cell line	Homo sampiens
ENCFF826XVE	ENCBS546RMD	ENCSR017GBO	eGFP-TFDP1-human	EFO:0002067	K562	immortalized cell line	Homo sampiens
ENCFF143UTJ	ENCBS528FGG	ENCSR787RVK	eGFP-TSC22D4-human	EFO:0002067	K562	immortalized cell line	Homo sampiens
ENCFF811OUA	ENCBS340PVD	ENCSR787RVK	eGFP-TSC22D4-human	EFO:0002067	K562	immortalized cell line	Homo sampiens
ENCFF464JHD	ENCBS351LOZ	ENCSR217WRC	eGFP-TSHZ1-human	EFO:0001182	HEK293	immortalized cell line	Homo sampiens
ENCFF010NVQ	ENCBS429FXL	ENCSR217WRC	eGFP-TSHZ1-human	EFO:0001182	HEK293	immortalized cell line	Homo sampiens
ENCFF523PEG	ENCBS105RVN	ENCSR359NFW	eGFP-USF2-human	EFO:0002067	K562	immortalized cell line	Homo sampiens
ENCFF918WMQ	ENCBS266WUA	ENCSR359NFW	eGFP-USF2-human	EFO:0002067	K562	immortalized cell line	Homo sampiens
ENCFF750PRY	ENCBS927FFT	ENCSR966PJJ	eGFP-WT1-human	EFO:0001182	HEK293	immortalized cell line	Homo sampiens
ENCFF256NAK	ENCBS740TWL	ENCSR966PJJ	eGFP-WT1-human	EFO:0001182	HEK293	immortalized cell line	Homo sampiens
ENCFF392OKA	ENCBS828IPH	ENCSR692HSE	eGFP-YY2-human	EFO:0001182	HEK293	immortalized cell line	Homo sampiens
ENCFF478LIY	ENCBS957THJ	ENCSR692HSE	eGFP-YY2-human	EFO:0001182	HEK293	immortalized cell line	Homo sampiens
ENCFF771JAW	ENCBS137HOM	ENCSR004PLU	eGFP-ZBTB10-human	EFO:0001182	HEK293	immortalized cell line	Homo sampiens
ENCFF332MIA	ENCBS542HYG	ENCSR004PLU	eGFP-ZBTB10-human	EFO:0001182	HEK293	immortalized cell line	Homo sampiens
ENCFF583PRY	ENCBS310DWJ	ENCSR882ZTS	eGFP-ZBTB11-human	EFO:0001182	HEK293	immortalized cell line	Homo sampiens
ENCFF492TFL	ENCBS097DHX	ENCSR882ZTS	eGFP-ZBTB11-human	EFO:0001182	HEK293	immortalized cell line	Homo sampiens
ENCFF434TTY	ENCBS170SCN	ENCSR706BJO	eGFP-ZBTB11-human	EFO:0002067	K562	immortalized cell line	Homo sampiens
ENCFF846HRR	ENCBS991MRU	ENCSR706BJO	eGFP-ZBTB11-human	EFO:0002067	K562	immortalized cell line	Homo sampiens
ENCFF823IRF	ENCBS492OGG	ENCSR631WAA	eGFP-ZBTB17-human	EFO:0001182	HEK293	immortalized cell line	Homo sampiens
ENCFF753PKK	ENCBS056OOQ	ENCSR631WAA	eGFP-ZBTB17-human	EFO:0001182	HEK293	immortalized cell line	Homo sampiens
ENCFF998OHX	ENCBS255RNI	ENCSR927UJQ	eGFP-ZBTB1-human	EFO:0001182	HEK293	immortalized cell line	Homo sampiens
ENCFF391ZJP	ENCBS221WVG	ENCSR927UJQ	eGFP-ZBTB1-human	EFO:0001182	HEK293	immortalized cell line	Homo sampiens
ENCFF347OMX	ENCBS544JLM	ENCSR460MBI	eGFP-ZBTB20-human	EFO:0001182	HEK293	immortalized cell line	Homo sampiens
ENCFF948BJB	ENCBS635EFP	ENCSR460MBI	eGFP-ZBTB20-human	EFO:0001182	HEK293	immortalized cell line	Homo sampiens
ENCFF220ZJP	ENCBS587LLP	ENCSR229DYF	eGFP-ZBTB26-human	EFO:0001182	HEK293	immortalized cell line	Homo sampiens
ENCFF502RYW	ENCBS097KFU	ENCSR229DYF	eGFP-ZBTB26-human	EFO:0001182	HEK293	immortalized cell line	Homo sampiens
ENCFF843NNY	ENCBS634DCB	ENCSR781EQJ	eGFP-ZBTB48-human	EFO:0001182	HEK293	immortalized cell line	Homo sampiens
ENCFF616KOM	ENCBS608CNR	ENCSR781EQJ	eGFP-ZBTB48-human	EFO:0001182	HEK293	immortalized cell line	Homo sampiens
ENCFF340TMD	ENCBS652OCL	ENCSR924GRG	eGFP-ZBTB49-human	EFO:0001182	HEK293	immortalized cell line	Homo sampiens
ENCFF911YIA	ENCBS876NMZ	ENCSR924GRG	eGFP-ZBTB49-human	EFO:0001182	HEK293	immortalized cell line	Homo sampiens
ENCFF303REI	ENCBS241SWW	ENCSR773REP	eGFP-ZBTB7A-human	EFO:0001182	HEK293	immortalized cell line	Homo sampiens
ENCFF739JCB	ENCBS628NYX	ENCSR773REP	eGFP-ZBTB7A-human	EFO:0001182	HEK293	immortalized cell line	Homo sampiens
ENCFF754QAG	ENCBS218CJM	ENCSR481FEC	eGFP-ZBTB8A-human	EFO:0001182	HEK293	immortalized cell line	Homo sampiens
ENCFF265PPN	ENCBS078UYW	ENCSR481FEC	eGFP-ZBTB8A-human	EFO:0001182	HEK293	immortalized cell line	Homo sampiens
ENCFF297DWV	ENCBS472JNF	ENCSR909HMT	eGFP-ZEB1-human	EFO:0001182	HEK293	immortalized cell line	Homo sampiens
ENCFF102PTL	ENCBS073ZEX	ENCSR909HMT	eGFP-ZEB1-human	EFO:0001182	HEK293	immortalized cell line	Homo sampiens
ENCFF528MPO	ENCBS665JKR	ENCSR417VWF	eGFP-ZEB2-human	EFO:0001182	HEK293	immortalized cell line	Homo sampiens
ENCFF286WTH	ENCBS768DUW	ENCSR417VWF	eGFP-ZEB2-human	EFO:0001182	HEK293	immortalized cell line	Homo sampiens
ENCFF180XGD	ENCBS234WKE	ENCSR632SIM	eGFP-ZFHX2-human	EFO:0001182	HEK293	immortalized cell line	Homo sampiens
ENCFF787ENP	ENCBS762DKV	ENCSR632SIM	eGFP-ZFHX2-human	EFO:0001182	HEK293	immortalized cell line	Homo sampiens
ENCFF365IHN	ENCBS841DEH	ENCSR365GRX	eGFP-ZFP37-human	EFO:0001182	HEK293	immortalized cell line	Homo sampiens
ENCFF014YFY	ENCBS853DEI	ENCSR365GRX	eGFP-ZFP37-human	EFO:0001182	HEK293	immortalized cell line	Homo sampiens
ENCFF140LQJ	ENCBS232OEE	ENCSR134QIE	eGFP-ZFP3-human	EFO:0001182	HEK293	immortalized cell line	Homo sampiens
ENCFF591HDZ	ENCBS543JVF	ENCSR134QIE	eGFP-ZFP3-human	EFO:0001182	HEK293	immortalized cell line	Homo sampiens
ENCFF156RXB	ENCBS503YOP	ENCSR348ONY	eGFP-ZFP41-human	EFO:0001182	HEK293	immortalized cell line	Homo sampiens
ENCFF996TTV	ENCBS424AYE	ENCSR348ONY	eGFP-ZFP41-human	EFO:0001182	HEK293	immortalized cell line	Homo sampiens
ENCFF159KKU	ENCBS307QUS	ENCSR592KSP	eGFP-ZFP64-human	EFO:0001182	HEK293	immortalized cell line	Homo sampiens
ENCFF440OEL	ENCBS502HSC	ENCSR592KSP	eGFP-ZFP64-human	EFO:0001182	HEK293	immortalized cell line	Homo sampiens
ENCFF975BWD	ENCBS386IWZ	ENCSR381VYR	eGFP-ZFP69B-human	EFO:0001182	HEK293	immortalized cell line	Homo sampiens
ENCFF667TBL	ENCBS114DPO	ENCSR381VYR	eGFP-ZFP69B-human	EFO:0001182	HEK293	immortalized cell line	Homo sampiens
ENCFF500GNW	ENCBS205YAO	ENCSR920ASP	eGFP-ZFX-human	EFO:0002067	K562	immortalized cell line	Homo sampiens
ENCFF804GZU	ENCBS675IUA	ENCSR920ASP	eGFP-ZFX-human	EFO:0002067	K562	immortalized cell line	Homo sampiens
ENCFF094HJZ	ENCBS763QCP	ENCSR728MWW	eGFP-ZIC2-human	EFO:0001182	HEK293	immortalized cell line	Homo sampiens
ENCFF363LYG	ENCBS629IXE	ENCSR728MWW	eGFP-ZIC2-human	EFO:0001182	HEK293	immortalized cell line	Homo sampiens
ENCFF508ZDE	ENCBS669BXB	ENCSR448UKK	eGFP-ZKSCAN8-human	EFO:0002067	K562	immortalized cell line	Homo sampiens
ENCFF473TXL	ENCBS541VKI	ENCSR448UKK	eGFP-ZKSCAN8-human	EFO:0002067	K562	immortalized cell line	Homo sampiens
ENCFF532EKD		ENCSR448UKK	eGFP-ZKSCAN8-human	EFO:0002067	K562	immortalized cell line	Homo sampiens
ENCFF924QCM	ENCBS096IDY	ENCSR462FWS	eGFP-ZNF101-human	EFO:0001182	HEK293	immortalized cell line	Homo sampiens
ENCFF970AJY	ENCBS370DEV	ENCSR462FWS	eGFP-ZNF101-human	EFO:0001182	HEK293	immortalized cell line	Homo sampiens
ENCFF060YYI	ENCBS557JBD	ENCSR224QDY	eGFP-ZNF121-human	EFO:0001182	HEK293	immortalized cell line	Homo sampiens
ENCFF605IDQ	ENCBS258CDJ	ENCSR224QDY	eGFP-ZNF121-human	EFO:0001182	HEK293	immortalized cell line	Homo sampiens
ENCFF723GWC	ENCBS431ZNZ	ENCSR283MWQ	eGFP-ZNF133-human	EFO:0001182	HEK293	immortalized cell line	Homo sampiens
ENCFF041AGD	ENCBS669LUY	ENCSR283MWQ	eGFP-ZNF133-human	EFO:0001182	HEK293	immortalized cell line	Homo sampiens
ENCFF133FDE	ENCBS646GOM	ENCSR551KAP	eGFP-ZNF138-human	EFO:0001182	HEK293	immortalized cell line	Homo sampiens
ENCFF698JDD	ENCBS403FNN	ENCSR551KAP	eGFP-ZNF138-human	EFO:0001182	HEK293	immortalized cell line	Homo sampiens
ENCFF804JJB	ENCBS627OXL	ENCSR464KFG	eGFP-ZNF140-human	EFO:0001182	HEK293	immortalized cell line	Homo sampiens
ENCFF114YKN	ENCBS212ZLO	ENCSR464KFG	eGFP-ZNF140-human	EFO:0001182	HEK293	immortalized cell line	Homo sampiens
ENCFF753SVR	ENCBS314JHW	ENCSR689YFA	eGFP-ZNF146-human	EFO:0001182	HEK293	immortalized cell line	Homo sampiens
ENCFF680DKU	ENCBS069ZWS	ENCSR689YFA	eGFP-ZNF146-human	EFO:0001182	HEK293	immortalized cell line	Homo sampiens
ENCFF907AFT	ENCBS532LAO	ENCSR801BWR	eGFP-ZNF155-human	EFO:0001182	HEK293	immortalized cell line	Homo sampiens
ENCFF351PFE	ENCBS556GOV	ENCSR801BWR	eGFP-ZNF155-human	EFO:0001182	HEK293	immortalized cell line	Homo sampiens
ENCFF050MYB	ENCBS126YNT	ENCSR564YYW	eGFP-ZNF157-human	EFO:0001182	HEK293	immortalized cell line	Homo sampiens
ENCFF008HXJ	ENCBS436OCK	ENCSR564YYW	eGFP-ZNF157-human	EFO:0001182	HEK293	immortalized cell line	Homo sampiens
ENCFF765AHP	ENCBS554TKL	ENCSR661AXW	eGFP-ZNF169-human	EFO:0001182	HEK293	immortalized cell line	Homo sampiens
ENCFF371EAK	ENCBS713DJH	ENCSR661AXW	eGFP-ZNF169-human	EFO:0001182	HEK293	immortalized cell line	Homo sampiens
ENCFF490FAT	ENCBS213ZWT	ENCSR093HXE	eGFP-ZNF16-human	EFO:0001182	HEK293	immortalized cell line	Homo sampiens
ENCFF277EIF	ENCBS617FVO	ENCSR093HXE	eGFP-ZNF16-human	EFO:0001182	HEK293	immortalized cell line	Homo sampiens
ENCFF060NHQ	ENCBS632ODA	ENCSR103GAK	eGFP-ZNF175-human	EFO:0001182	HEK293	immortalized cell line	Homo sampiens
ENCFF495BAQ	ENCBS558YVE	ENCSR103GAK	eGFP-ZNF175-human	EFO:0001182	HEK293	immortalized cell line	Homo sampiens
ENCFF775KLX	ENCBS200VWP	ENCSR011PEI	eGFP-ZNF175-human	EFO:0002067	K562	immortalized cell line	Homo sampiens
ENCFF538HUN	ENCBS098BHX	ENCSR011PEI	eGFP-ZNF175-human	EFO:0002067	K562	immortalized cell line	Homo sampiens
ENCFF922WUK	ENCBS511ASG	ENCSR977HTH	eGFP-ZNF18-human	EFO:0001182	HEK293	immortalized cell line	Homo sampiens
ENCFF484PDX	ENCBS867IQP	ENCSR977HTH	eGFP-ZNF18-human	EFO:0001182	HEK293	immortalized cell line	Homo sampiens
ENCFF764PZX	ENCBS261OYC	ENCSR580IAO	eGFP-ZNF197-human	EFO:0002067	K562	immortalized cell line	Homo sampiens
ENCFF947CVN	ENCBS437BJN	ENCSR580IAO	eGFP-ZNF197-human	EFO:0002067	K562	immortalized cell line	Homo sampiens
ENCFF909EWL	ENCBS620EBJ	ENCSR811JJM	eGFP-ZNF19-human	EFO:0001182	HEK293	immortalized cell line	Homo sampiens
ENCFF426ZNF	ENCBS761ZMR	ENCSR811JJM	eGFP-ZNF19-human	EFO:0001182	HEK293	immortalized cell line	Homo sampiens
ENCFF143SQI	ENCBS684ULW	ENCSR996FYT	eGFP-ZNF202-human	EFO:0001182	HEK293	immortalized cell line	Homo sampiens
ENCFF379HWR	ENCBS963BCC	ENCSR996FYT	eGFP-ZNF202-human	EFO:0001182	HEK293	immortalized cell line	Homo sampiens
ENCFF093DMB	ENCBS647GXU	ENCSR365DQH	eGFP-ZNF211-human	EFO:0001182	HEK293	immortalized cell line	Homo sampiens
ENCFF236UXG	ENCBS387JTZ	ENCSR365DQH	eGFP-ZNF211-human	EFO:0001182	HEK293	immortalized cell line	Homo sampiens
ENCFF594YRH	ENCBS535XFL	ENCSR906PCS	eGFP-ZNF223-human	EFO:0001182	HEK293	immortalized cell line	Homo sampiens
ENCFF293YXI	ENCBS727PQJ	ENCSR906PCS	eGFP-ZNF223-human	EFO:0001182	HEK293	immortalized cell line	Homo sampiens
ENCFF856TQX	ENCBS169OUF	ENCSR440COG	eGFP-ZNF239-human	EFO:0001182	HEK293	immortalized cell line	Homo sampiens
ENCFF216HOT	ENCBS140ULK	ENCSR440COG	eGFP-ZNF239-human	EFO:0001182	HEK293	immortalized cell line	Homo sampiens
ENCFF056PRJ	ENCBS834ZTA	ENCSR679KXF	eGFP-ZNF23-human	EFO:0001182	HEK293	immortalized cell line	Homo sampiens
ENCFF738NDC	ENCBS712HFH	ENCSR679KXF	eGFP-ZNF23-human	EFO:0001182	HEK293	immortalized cell line	Homo sampiens
ENCFF469URD	ENCBS386RAW	ENCSR984MDV	eGFP-ZNF24-human	EFO:0001182	HEK293	immortalized cell line	Homo sampiens
ENCFF150NDP	ENCBS417ONA	ENCSR984MDV	eGFP-ZNF24-human	EFO:0001182	HEK293	immortalized cell line	Homo sampiens
ENCFF807NZJ	ENCBS985SCL	ENCSR117WTM	eGFP-ZNF24-human	EFO:0002067	K562	immortalized cell line	Homo sampiens
ENCFF767NHP	ENCBS016MLC	ENCSR117WTM	eGFP-ZNF24-human	EFO:0002067	K562	immortalized cell line	Homo sampiens
ENCFF767JNN	ENCBS731OFH	ENCSR519HKW	eGFP-ZNF264-human	EFO:0001182	HEK293	immortalized cell line	Homo sampiens
ENCFF285HKO	ENCBS584HTL	ENCSR519HKW	eGFP-ZNF264-human	EFO:0001182	HEK293	immortalized cell line	Homo sampiens
ENCFF602LPS	ENCBS437JQH	ENCSR466VYP	eGFP-ZNF266-human	EFO:0001182	HEK293	immortalized cell line	Homo sampiens
ENCFF548EUS	ENCBS160NBU	ENCSR466VYP	eGFP-ZNF266-human	EFO:0001182	HEK293	immortalized cell line	Homo sampiens
ENCFF360QLH	ENCBS415OTP	ENCSR028EGI	eGFP-ZNF26-human	EFO:0001182	HEK293	immortalized cell line	Homo sampiens
ENCFF890KOK	ENCBS022NMA	ENCSR028EGI	eGFP-ZNF26-human	EFO:0001182	HEK293	immortalized cell line	Homo sampiens
ENCFF781CQH	ENCBS755LQF	ENCSR178QVJ	eGFP-ZNF274-human	EFO:0001182	HEK293	immortalized cell line	Homo sampiens
ENCFF048LDJ	ENCBS224QCU	ENCSR178QVJ	eGFP-ZNF274-human	EFO:0001182	HEK293	immortalized cell line	Homo sampiens
ENCFF010ZJB	ENCBS321CYC	ENCSR076KZW	eGFP-ZNF280C-human	EFO:0001182	HEK293	immortalized cell line	Homo sampiens
ENCFF030JHL	ENCBS348FEH	ENCSR076KZW	eGFP-ZNF280C-human	EFO:0001182	HEK293	immortalized cell line	Homo sampiens
ENCFF320JZH	ENCBS214JNY	ENCSR451CYX	eGFP-ZNF280D-human	EFO:0001182	HEK293	immortalized cell line	Homo sampiens
ENCFF882ISN	ENCBS107SDK	ENCSR451CYX	eGFP-ZNF280D-human	EFO:0001182	HEK293	immortalized cell line	Homo sampiens
ENCFF828PXU	ENCBS829KGK	ENCSR228PGT	eGFP-ZNF292-human	EFO:0001182	HEK293	immortalized cell line	Homo sampiens
ENCFF329FLI	ENCBS918UBA	ENCSR228PGT	eGFP-ZNF292-human	EFO:0001182	HEK293	immortalized cell line	Homo sampiens
ENCFF967GZZ	ENCBS158KCV	ENCSR011CKE	eGFP-ZNF2-human	EFO:0001182	HEK293	immortalized cell line	Homo sampiens
ENCFF897XWU	ENCBS824HHH	ENCSR011CKE	eGFP-ZNF2-human	EFO:0001182	HEK293	immortalized cell line	Homo sampiens
ENCFF754GXN	ENCBS644MIA	ENCSR513MGG	eGFP-ZNF302-human	EFO:0001182	HEK293	immortalized cell line	Homo sampiens
ENCFF832LBH	ENCBS934RQK	ENCSR513MGG	eGFP-ZNF302-human	EFO:0001182	HEK293	immortalized cell line	Homo sampiens
ENCFF519ODA	ENCBS026LOR	ENCSR768HOH	eGFP-ZNF324-human	EFO:0001182	HEK293	immortalized cell line	Homo sampiens
ENCFF916SIK	ENCBS088ZVR	ENCSR768HOH	eGFP-ZNF324-human	EFO:0001182	HEK293	immortalized cell line	Homo sampiens
ENCFF638LOJ	ENCBS879KEF	ENCSR328SUD	eGFP-ZNF335-human	EFO:0001182	HEK293	immortalized cell line	Homo sampiens
ENCFF842YIW	ENCBS967MZW	ENCSR328SUD	eGFP-ZNF335-human	EFO:0001182	HEK293	immortalized cell line	Homo sampiens
ENCFF707OMI	ENCBS015PWI	ENCSR185FOY	eGFP-ZNF341-human	EFO:0001182	HEK293	immortalized cell line	Homo sampiens
ENCFF512NLI	ENCBS020GOD	ENCSR185FOY	eGFP-ZNF341-human	EFO:0001182	HEK293	immortalized cell line	Homo sampiens
ENCFF040FFN	ENCBS933IRC	ENCSR674SCQ	eGFP-ZNF354B-human	EFO:0002067	K562	immortalized cell line	Homo sampiens
ENCFF432JII	ENCBS691VMX	ENCSR674SCQ	eGFP-ZNF354B-human	EFO:0002067	K562	immortalized cell line	Homo sampiens
ENCFF064TXC	ENCBS889KAG	ENCSR289NSN	eGFP-ZNF354C-human	EFO:0001182	HEK293	immortalized cell line	Homo sampiens
ENCFF262FGR	ENCBS836GPK	ENCSR289NSN	eGFP-ZNF354C-human	EFO:0001182	HEK293	immortalized cell line	Homo sampiens
ENCFF132TRH	ENCBS493ARE	ENCSR715QNO	eGFP-ZNF362-human	EFO:0001182	HEK293	immortalized cell line	Homo sampiens
ENCFF422TQA	ENCBS409JDS	ENCSR715QNO	eGFP-ZNF362-human	EFO:0001182	HEK293	immortalized cell line	Homo sampiens
ENCFF122GSS	ENCBS384PIE	ENCSR106EBH	eGFP-ZNF366-human	EFO:0001182	HEK293	immortalized cell line	Homo sampiens
ENCFF345DHS	ENCBS594XEQ	ENCSR106EBH	eGFP-ZNF366-human	EFO:0001182	HEK293	immortalized cell line	Homo sampiens
ENCFF460MGY	ENCBS076BVM	ENCSR210MET	eGFP-ZNF391-human	EFO:0001182	HEK293	immortalized cell line	Homo sampiens
ENCFF382ACR	ENCBS813VRX	ENCSR210MET	eGFP-ZNF391-human	EFO:0001182	HEK293	immortalized cell line	Homo sampiens
ENCFF863GDL	ENCBS869JBY	ENCSR669GUM	eGFP-ZNF404-human	EFO:0001182	HEK293	immortalized cell line	Homo sampiens
ENCFF422QKP	ENCBS039IEL	ENCSR669GUM	eGFP-ZNF404-human	EFO:0001182	HEK293	immortalized cell line	Homo sampiens
ENCFF778FZI	ENCBS404HWV	ENCSR604CNJ	eGFP-ZNF416-human	EFO:0001182	HEK293	immortalized cell line	Homo sampiens
ENCFF161TEI	ENCBS685NPT	ENCSR604CNJ	eGFP-ZNF416-human	EFO:0001182	HEK293	immortalized cell line	Homo sampiens
ENCFF094UHU	ENCBS519RHO	ENCSR477OJI	eGFP-ZNF423-human	EFO:0001182	HEK293	immortalized cell line	Homo sampiens
ENCFF387CIP	ENCBS992HKQ	ENCSR477OJI	eGFP-ZNF423-human	EFO:0001182	HEK293	immortalized cell line	Homo sampiens
ENCFF651TWV	ENCBS413IZR	ENCSR586BRJ	eGFP-ZNF433-human	EFO:0001182	HEK293	immortalized cell line	Homo sampiens
ENCFF193OQZ	ENCBS329NKK	ENCSR586BRJ	eGFP-ZNF433-human	EFO:0001182	HEK293	immortalized cell line	Homo sampiens
ENCFF824EPV	ENCBS066RVK	ENCSR363XBR	eGFP-ZNF488-human	EFO:0001182	HEK293	immortalized cell line	Homo sampiens
ENCFF340ZCE	ENCBS294FAI	ENCSR363XBR	eGFP-ZNF488-human	EFO:0001182	HEK293	immortalized cell line	Homo sampiens
ENCFF487QNN	ENCBS614LIB	ENCSR517DDU	eGFP-ZNF48-human	EFO:0001182	HEK293	immortalized cell line	Homo sampiens
ENCFF416AHQ	ENCBS214FUN	ENCSR517DDU	eGFP-ZNF48-human	EFO:0001182	HEK293	immortalized cell line	Homo sampiens
ENCFF629LJM	ENCBS692PCT	ENCSR550ZZK	eGFP-ZNF493-human	EFO:0001182	HEK293	immortalized cell line	Homo sampiens
ENCFF265DSL	ENCBS269SYD	ENCSR550ZZK	eGFP-ZNF493-human	EFO:0001182	HEK293	immortalized cell line	Homo sampiens
ENCFF231LLP	ENCBS207QGV	ENCSR461ZJT	eGFP-ZNF501-human	EFO:0001182	HEK293	immortalized cell line	Homo sampiens
ENCFF914AEL	ENCBS152WBM	ENCSR461ZJT	eGFP-ZNF501-human	EFO:0001182	HEK293	immortalized cell line	Homo sampiens
ENCFF949SXE	ENCBS042PVO	ENCSR598TIR	eGFP-ZNF507-human	EFO:0002067	K562	immortalized cell line	Homo sampiens
ENCFF821SUV	ENCBS466GBM	ENCSR598TIR	eGFP-ZNF507-human	EFO:0002067	K562	immortalized cell line	Homo sampiens
ENCFF512JPN	ENCBS259DFK	ENCSR591CCL	eGFP-ZNF512-human	EFO:0002067	K562	immortalized cell line	Homo sampiens
ENCFF187NQM	ENCBS725WFV	ENCSR591CCL	eGFP-ZNF512-human	EFO:0002067	K562	immortalized cell line	Homo sampiens
ENCFF177TLU	ENCBS899PRO	ENCSR897RVP	eGFP-ZNF514-human	EFO:0001182	HEK293	immortalized cell line	Homo sampiens
ENCFF026ARN	ENCBS984ZDJ	ENCSR897RVP	eGFP-ZNF514-human	EFO:0001182	HEK293	immortalized cell line	Homo sampiens
ENCFF213TEN	ENCBS033LOT	ENCSR159GFL	eGFP-ZNF518A-human	EFO:0001182	HEK293	immortalized cell line	Homo sampiens
ENCFF224CNS	ENCBS562OGG	ENCSR159GFL	eGFP-ZNF518A-human	EFO:0001182	HEK293	immortalized cell line	Homo sampiens
ENCFF041ENO	ENCBS483GEY	ENCSR418NZA	eGFP-ZNF524-human	EFO:0001182	HEK293	immortalized cell line	Homo sampiens
ENCFF147BZB	ENCBS900SYX	ENCSR418NZA	eGFP-ZNF524-human	EFO:0001182	HEK293	immortalized cell line	Homo sampiens
ENCFF884VSM	ENCBS976SKV	ENCSR701RXW	eGFP-ZNF530-human	EFO:0001182	HEK293	immortalized cell line	Homo sampiens
ENCFF789HSB	ENCBS599LKO	ENCSR701RXW	eGFP-ZNF530-human	EFO:0001182	HEK293	immortalized cell line	Homo sampiens
ENCFF021FPF	ENCBS145GQX	ENCSR909TSW	eGFP-ZNF547-human	EFO:0001182	HEK293	immortalized cell line	Homo sampiens
ENCFF902WES	ENCBS073WLU	ENCSR909TSW	eGFP-ZNF547-human	EFO:0001182	HEK293	immortalized cell line	Homo sampiens
ENCFF489VWP	ENCBS302IJW	ENCSR892ZTO	eGFP-ZNF548-human	EFO:0001182	HEK293	immortalized cell line	Homo sampiens
ENCFF075MEV	ENCBS867ZTE	ENCSR892ZTO	eGFP-ZNF548-human	EFO:0001182	HEK293	immortalized cell line	Homo sampiens
ENCFF955GGR	ENCBS305FAK	ENCSR447ZTA	eGFP-ZNF558-human	EFO:0001182	HEK293	immortalized cell line	Homo sampiens
ENCFF200VJD	ENCBS079QRO	ENCSR447ZTA	eGFP-ZNF558-human	EFO:0001182	HEK293	immortalized cell line	Homo sampiens
ENCFF236KFT	ENCBS811AFW	ENCSR668HOP	eGFP-ZNF580-human	EFO:0001182	HEK293	immortalized cell line	Homo sampiens
ENCFF764AKW	ENCBS507LXF	ENCSR668HOP	eGFP-ZNF580-human	EFO:0001182	HEK293	immortalized cell line	Homo sampiens
ENCFF749SPN	ENCBS922MVL	ENCSR149ZBI	eGFP-ZNF584-human	EFO:0002067	K562	immortalized cell line	Homo sampiens
ENCFF151KAU	ENCBS101CXP	ENCSR149ZBI	eGFP-ZNF584-human	EFO:0002067	K562	immortalized cell line	Homo sampiens
ENCFF599UMV	ENCBS472HLI	ENCSR011XCI	eGFP-ZNF585B-human	EFO:0001182	HEK293	immortalized cell line	Homo sampiens
ENCFF555IYB	ENCBS284GFM	ENCSR011XCI	eGFP-ZNF585B-human	EFO:0001182	HEK293	immortalized cell line	Homo sampiens
ENCFF729JBY	ENCBS912VQO	ENCSR603XLW	eGFP-ZNF589-human	EFO:0002067	K562	immortalized cell line	Homo sampiens
ENCFF500XCK	ENCBS070CNU	ENCSR603XLW	eGFP-ZNF589-human	EFO:0002067	K562	immortalized cell line	Homo sampiens
ENCFF936RIU	ENCBS629GNX	ENCSR017QBI	eGFP-ZNF600-human	EFO:0001182	HEK293	immortalized cell line	Homo sampiens
ENCFF573QVR	ENCBS172MXQ	ENCSR017QBI	eGFP-ZNF600-human	EFO:0001182	HEK293	immortalized cell line	Homo sampiens
ENCFF586HZR	ENCBS494YKN	ENCSR691TXI	eGFP-ZNF610-human	EFO:0001182	HEK293	immortalized cell line	Homo sampiens
ENCFF746OBW	ENCBS479SVO	ENCSR691TXI	eGFP-ZNF610-human	EFO:0001182	HEK293	immortalized cell line	Homo sampiens
ENCFF745ITX	ENCBS163UGH	ENCSR022IZK	eGFP-ZNF623-human	EFO:0001182	HEK293	immortalized cell line	Homo sampiens
ENCFF575OIR	ENCBS644JET	ENCSR022IZK	eGFP-ZNF623-human	EFO:0001182	HEK293	immortalized cell line	Homo sampiens
ENCFF117CKT	ENCBS967JDE	ENCSR845BCL	eGFP-ZNF639-human	EFO:0002067	K562	immortalized cell line	Homo sampiens
ENCFF916QKW	ENCBS215BGQ	ENCSR845BCL	eGFP-ZNF639-human	EFO:0002067	K562	immortalized cell line	Homo sampiens
ENCFF171DED	ENCBS486AZC	ENCSR080CST	eGFP-ZNF639-human	EFO:0001182	HEK293	immortalized cell line	Homo sampiens
ENCFF485MII	ENCBS695IQG	ENCSR080CST	eGFP-ZNF639-human	EFO:0001182	HEK293	immortalized cell line	Homo sampiens
ENCFF729SVH	ENCBS923DEI	ENCSR729HVR	eGFP-ZNF644-human	EFO:0002067	K562	immortalized cell line	Homo sampiens
ENCFF968XOX	ENCBS885SBO	ENCSR729HVR	eGFP-ZNF644-human	EFO:0002067	K562	immortalized cell line	Homo sampiens
ENCFF354JYP	ENCBS790DZT	ENCSR776LDJ	eGFP-ZNF645-human	EFO:0001182	HEK293	immortalized cell line	Homo sampiens
ENCFF782WSP	ENCBS493NNI	ENCSR776LDJ	eGFP-ZNF645-human	EFO:0001182	HEK293	immortalized cell line	Homo sampiens
ENCFF970QPM	ENCBS543KCA	ENCSR504VDV	eGFP-ZNF654-human	EFO:0001182	HEK293	immortalized cell line	Homo sampiens
ENCFF903YHB	ENCBS603HMT	ENCSR504VDV	eGFP-ZNF654-human	EFO:0001182	HEK293	immortalized cell line	Homo sampiens
ENCFF614FKO	ENCBS586MKT	ENCSR762DQP	eGFP-ZNF658-human	EFO:0001182	HEK293	immortalized cell line	Homo sampiens
ENCFF201SSP	ENCBS496WJT	ENCSR762DQP	eGFP-ZNF658-human	EFO:0001182	HEK293	immortalized cell line	Homo sampiens
ENCFF973PTB	ENCBS449AKC	ENCSR714LZQ	eGFP-ZNF664-human	EFO:0001182	HEK293	immortalized cell line	Homo sampiens
ENCFF416GTI	ENCBS360VTQ	ENCSR714LZQ	eGFP-ZNF664-human	EFO:0001182	HEK293	immortalized cell line	Homo sampiens
ENCFF286VPW	ENCBS698KCZ	ENCSR233MWH	eGFP-ZNF670-human	EFO:0001182	HEK293	immortalized cell line	Homo sampiens
ENCFF514JGR	ENCBS743ZXV	ENCSR233MWH	eGFP-ZNF670-human	EFO:0001182	HEK293	immortalized cell line	Homo sampiens
ENCFF499NJO	ENCBS860LMD	ENCSR307CKC	eGFP-ZNF680-human	EFO:0001182	HEK293	immortalized cell line	Homo sampiens
ENCFF985SIU	ENCBS789RTN	ENCSR307CKC	eGFP-ZNF680-human	EFO:0001182	HEK293	immortalized cell line	Homo sampiens
ENCFF631GFV	ENCBS809DNX	ENCSR418MKG	eGFP-ZNF692-human	EFO:0001182	HEK293	immortalized cell line	Homo sampiens
ENCFF305MAN	ENCBS992CJC	ENCSR418MKG	eGFP-ZNF692-human	EFO:0001182	HEK293	immortalized cell line	Homo sampiens
ENCFF289IND	ENCBS879FIM	ENCSR217QCK	eGFP-ZNF697-human	EFO:0001182	HEK293	immortalized cell line	Homo sampiens
ENCFF860NPU	ENCBS676HTV	ENCSR217QCK	eGFP-ZNF697-human	EFO:0001182	HEK293	immortalized cell line	Homo sampiens
ENCFF419WTW	ENCBS480YJG	ENCSR547TGL	eGFP-ZNF701-human	EFO:0001182	HEK293	immortalized cell line	Homo sampiens
ENCFF479DTT	ENCBS846SLU	ENCSR547TGL	eGFP-ZNF701-human	EFO:0001182	HEK293	immortalized cell line	Homo sampiens
ENCFF523IZS	ENCBS514PWP	ENCSR194KWL	eGFP-ZNF704-human	EFO:0001182	HEK293	immortalized cell line	Homo sampiens
ENCFF223KZR	ENCBS953VTG	ENCSR194KWL	eGFP-ZNF704-human	EFO:0001182	HEK293	immortalized cell line	Homo sampiens
ENCFF384ART	ENCBS249ESB	ENCSR854IPI	eGFP-ZNF707-human	EFO:0001182	HEK293	immortalized cell line	Homo sampiens
ENCFF229ETI	ENCBS402FLP	ENCSR854IPI	eGFP-ZNF707-human	EFO:0001182	HEK293	immortalized cell line	Homo sampiens
ENCFF356LRY	ENCBS450DNI	ENCSR737UST	eGFP-ZNF740-human	EFO:0002067	K562	immortalized cell line	Homo sampiens
ENCFF284BJY	ENCBS020CGZ	ENCSR737UST	eGFP-ZNF740-human	EFO:0002067	K562	immortalized cell line	Homo sampiens
ENCFF424AYM	ENCBS353NLF	ENCSR532EMP	eGFP-ZNF740-human	EFO:0002067	K562	immortalized cell line	Homo sampiens
ENCFF130RDX	ENCBS160YCN	ENCSR532EMP	eGFP-ZNF740-human	EFO:0002067	K562	immortalized cell line	Homo sampiens
ENCFF377NHQ	ENCBS956LCM	ENCSR497IAS	eGFP-ZNF747-human	EFO:0001182	HEK293	immortalized cell line	Homo sampiens
ENCFF060RLW	ENCBS456WQW	ENCSR497IAS	eGFP-ZNF747-human	EFO:0001182	HEK293	immortalized cell line	Homo sampiens
ENCFF323PVX	ENCBS605NSN	ENCSR194IJN	eGFP-ZNF766-human	EFO:0002067	K562	immortalized cell line	Homo sampiens
ENCFF133ZYE	ENCBS105ZBV	ENCSR194IJN	eGFP-ZNF766-human	EFO:0002067	K562	immortalized cell line	Homo sampiens
ENCFF026ZLM	ENCBS168VCZ	ENCSR072LQF	eGFP-ZNF76-human	EFO:0001182	HEK293	immortalized cell line	Homo sampiens
ENCFF612XXN	ENCBS889BJN	ENCSR072LQF	eGFP-ZNF76-human	EFO:0001182	HEK293	immortalized cell line	Homo sampiens
ENCFF894UUJ	ENCBS771HHP	ENCSR777YSB	eGFP-ZNF781-human	EFO:0001182	HEK293	immortalized cell line	Homo sampiens
ENCFF113UPL	ENCBS393FBB	ENCSR777YSB	eGFP-ZNF781-human	EFO:0001182	HEK293	immortalized cell line	Homo sampiens
ENCFF840CEN	ENCBS764OVL	ENCSR950ACO	eGFP-ZNF785-human	EFO:0001182	HEK293	immortalized cell line	Homo sampiens
ENCFF844SVF	ENCBS273GWY	ENCSR950ACO	eGFP-ZNF785-human	EFO:0001182	HEK293	immortalized cell line	Homo sampiens
ENCFF365PEG	ENCBS335ETQ	ENCSR775HFF	eGFP-ZNF791-human	EFO:0001182	HEK293	immortalized cell line	Homo sampiens
ENCFF654YPD	ENCBS550ALC	ENCSR775HFF	eGFP-ZNF791-human	EFO:0001182	HEK293	immortalized cell line	Homo sampiens
ENCFF883INN	ENCBS552GTN	ENCSR679STZ	eGFP-ZNF792-human	EFO:0001182	HEK293	immortalized cell line	Homo sampiens
ENCFF937IZT	ENCBS636SBW	ENCSR679STZ	eGFP-ZNF792-human	EFO:0001182	HEK293	immortalized cell line	Homo sampiens
ENCFF080KBG	ENCBS915UTY	ENCSR711UOA	eGFP-ZNF837-human	EFO:0001182	HEK293	immortalized cell line	Homo sampiens
ENCFF180OJS	ENCBS927IRD	ENCSR711UOA	eGFP-ZNF837-human	EFO:0001182	HEK293	immortalized cell line	Homo sampiens
ENCFF306XER	ENCBS949ZPT	ENCSR257XVY	eGFP-ZNF83-human	EFO:0002067	K562	immortalized cell line	Homo sampiens
ENCFF054RVU	ENCBS340DSB	ENCSR257XVY	eGFP-ZNF83-human	EFO:0002067	K562	immortalized cell line	Homo sampiens
ENCFF760BKV	ENCBS243XVF	ENCSR502KPJ	eGFP-ZNF843-human	EFO:0001182	HEK293	immortalized cell line	Homo sampiens
ENCFF413KOS	ENCBS510KXV	ENCSR502KPJ	eGFP-ZNF843-human	EFO:0001182	HEK293	immortalized cell line	Homo sampiens
ENCFF296AFI	ENCBS045SQX	ENCSR864VJE	eGFP-ZSCAN16-human	EFO:0001182	HEK293	immortalized cell line	Homo sampiens
ENCFF137ZVN	ENCBS844SVG	ENCSR864VJE	eGFP-ZSCAN16-human	EFO:0001182	HEK293	immortalized cell line	Homo sampiens
ENCFF261NWL	ENCBS763AYG	ENCSR721QZV	eGFP-ZSCAN18-human	EFO:0001182	HEK293	immortalized cell line	Homo sampiens
ENCFF478KXP	ENCBS534EOJ	ENCSR721QZV	eGFP-ZSCAN18-human	EFO:0001182	HEK293	immortalized cell line	Homo sampiens
ENCFF614UDN	ENCBS200HYZ	ENCSR705ASR	eGFP-ZSCAN23-human	EFO:0001182	HEK293	immortalized cell line	Homo sampiens
ENCFF677ERR	ENCBS970UWN	ENCSR705ASR	eGFP-ZSCAN23-human	EFO:0001182	HEK293	immortalized cell line	Homo sampiens
ENCFF651ADF	ENCBS190VSK	ENCSR357QJR	eGFP-ZSCAN5A-human	EFO:0001182	HEK293	immortalized cell line	Homo sampiens
ENCFF466IFZ	ENCBS882KQI	ENCSR357QJR	eGFP-ZSCAN5A-human	EFO:0001182	HEK293	immortalized cell line	Homo sampiens
ENCFF440TNK	ENCBS206XBQ	ENCSR559IOZ	eGFP-ZXDB-human	EFO:0001182	HEK293	immortalized cell line	Homo sampiens
ENCFF109PJP	ENCBS242RIC	ENCSR559IOZ	eGFP-ZXDB-human	EFO:0001182	HEK293	immortalized cell line	Homo sampiens
ENCFF000QLP	ENCBS056AAA	ENCSR000BUX	EGR1-human	EFO:0001203	MCF-7	immortalized cell line	Homo sampiens
ENCFF000QLS	ENCBS056AAA	ENCSR000BUX	EGR1-human	EFO:0001203	MCF-7	immortalized cell line	Homo sampiens
ENCFF000NUO	ENCBS110ENC	ENCSR000BRG	EGR1-human	EFO:0002784	GM12878	immortalized cell line	Homo sampiens
ENCFF000OYW	ENCBS389ENC	ENCSR000BRZ	EGR1-human	EFO:0002824	HCT116	immortalized cell line	Homo sampiens
ENCFF000OZA	ENCBS389ENC	ENCSR000BRZ	EGR1-human	EFO:0002824	HCT116	immortalized cell line	Homo sampiens
ENCFF000NKW	ENCBS034DOC	ENCSR000BSQ	EGR1-human	EFO:0005718	Ishikawa	immortalized cell line	Homo sampiens
ENCFF000NKX	ENCBS034DOC	ENCSR000BSQ	EGR1-human	EFO:0005718	Ishikawa	immortalized cell line	Homo sampiens
ENCFF000ONZ	ENCBS111ENC	ENCSR000BJA	EGR1-human	EFO:0003042	H1-hESC	stem cell	Homo sampiens
ENCFF000OOA	ENCBS111ENC	ENCSR000BJA	EGR1-human	EFO:0003042	H1-hESC	stem cell	Homo sampiens
ENCFF343RXC	ENCBS111ENC	ENCSR000BJA	EGR1-human	EFO:0003042	H1-hESC	stem cell	Homo sampiens
ENCFF998VOK	ENCBS111ENC	ENCSR000BJA	EGR1-human	EFO:0003042	H1-hESC	stem cell	Homo sampiens
ENCFF000PZB	ENCBS109ENC	ENCSR000BNE	EGR1-human	EFO:0002067	K562	immortalized cell line	Homo sampiens
ENCFF000PZC	ENCBS109ENC	ENCSR000BNE	EGR1-human	EFO:0002067	K562	immortalized cell line	Homo sampiens
ENCFF052PXH	ENCBS109ENC	ENCSR000BNE	EGR1-human	EFO:0002067	K562	immortalized cell line	Homo sampiens
ENCFF481PJT	ENCBS109ENC	ENCSR000BNE	EGR1-human	EFO:0002067	K562	immortalized cell line	Homo sampiens
ENCFF000NUS	ENCBS110ENC	ENCSR000BMQ	EGR1-human	EFO:0002784	GM12878	immortalized cell line	Homo sampiens
ENCFF000NUT	ENCBS110ENC	ENCSR000BMQ	EGR1-human	EFO:0002784	GM12878	immortalized cell line	Homo sampiens
ENCFF865GYQ	ENCBS110ENC	ENCSR000BMQ	EGR1-human	EFO:0002784	GM12878	immortalized cell line	Homo sampiens
ENCFF349IIG	ENCBS110ENC	ENCSR000BMQ	EGR1-human	EFO:0002784	GM12878	immortalized cell line	Homo sampiens
ENCFF730KGN	ENCBS117POP	ENCSR321BJQ	EHMT2-human	EFO:0001086	A549	immortalized cell line	Homo sampiens
ENCFF806BMO	ENCBS998UBJ	ENCSR321BJQ	EHMT2-human	EFO:0001086	A549	immortalized cell line	Homo sampiens
ENCFF000PZJ	ENCBS109ENC	ENCSR000BMD	ELF1-human	EFO:0002067	K562	immortalized cell line	Homo sampiens
ENCFF000PZM	ENCBS109ENC	ENCSR000BMD	ELF1-human	EFO:0002067	K562	immortalized cell line	Homo sampiens
ENCFF649QHV	ENCBS109ENC	ENCSR000BMD	ELF1-human	EFO:0002067	K562	immortalized cell line	Homo sampiens
ENCFF400SJA	ENCBS109ENC	ENCSR000BMD	ELF1-human	EFO:0002067	K562	immortalized cell line	Homo sampiens
ENCFF791XQO	ENCBS734NZL	ENCSR502OEK	ELF1-human	EFO:0002067	K562	immortalized cell line	Homo sampiens
ENCFF357FKU	ENCBS994WPS	ENCSR502OEK	ELF1-human	EFO:0002067	K562	immortalized cell line	Homo sampiens
ENCFF000QLX	ENCBS056AAA	ENCSR000BSS	ELF1-human	EFO:0001203	MCF-7	immortalized cell line	Homo sampiens
ENCFF000QMA	ENCBS056AAA	ENCSR000BSS	ELF1-human	EFO:0001203	MCF-7	immortalized cell line	Homo sampiens
ENCFF000QXH	ENCBS428ENC	ENCSR000BTA	ELF1-human	EFO:0003072	SK-N-SH	immortalized cell line	Homo sampiens
ENCFF000QXI	ENCBS428ENC	ENCSR000BTA	ELF1-human	EFO:0003072	SK-N-SH	immortalized cell line	Homo sampiens
ENCFF000NUX	ENCBS110ENC	ENCSR000BMB	ELF1-human	EFO:0002784	GM12878	immortalized cell line	Homo sampiens
ENCFF000NUY	ENCBS110ENC	ENCSR000BMB	ELF1-human	EFO:0002784	GM12878	immortalized cell line	Homo sampiens
ENCFF658MQE	ENCBS110ENC	ENCSR000BMB	ELF1-human	EFO:0002784	GM12878	immortalized cell line	Homo sampiens
ENCFF386ILI	ENCBS110ENC	ENCSR000BMB	ELF1-human	EFO:0002784	GM12878	immortalized cell line	Homo sampiens
ENCFF000MYQ	ENCBS423ENC	ENCSR000BPT	ELF1-human	EFO:0001086	A549	immortalized cell line	Homo sampiens
ENCFF000MYU	ENCBS423ENC	ENCSR000BPT	ELF1-human	EFO:0001086	A549	immortalized cell line	Homo sampiens
ENCFF498ADD	ENCBS423ENC	ENCSR000BPT	ELF1-human	EFO:0001086	A549	immortalized cell line	Homo sampiens
ENCFF860JJU	ENCBS423ENC	ENCSR000BPT	ELF1-human	EFO:0001086	A549	immortalized cell line	Homo sampiens
ENCFF000OZE	ENCBS389ENC	ENCSR000BVH	ELF1-human	EFO:0002824	HCT116	immortalized cell line	Homo sampiens
ENCFF000OZF	ENCBS389ENC	ENCSR000BVH	ELF1-human	EFO:0002824	HCT116	immortalized cell line	Homo sampiens
ENCFF000PHA	ENCBS114ENC	ENCSR000BMZ	ELF1-human	EFO:0001187	HepG2	immortalized cell line	Homo sampiens
ENCFF000PHB	ENCBS114ENC	ENCSR000BMZ	ELF1-human	EFO:0001187	HepG2	immortalized cell line	Homo sampiens
ENCFF319HSK	ENCBS114ENC	ENCSR000BMZ	ELF1-human	EFO:0001187	HepG2	immortalized cell line	Homo sampiens
ENCFF081HCC	ENCBS114ENC	ENCSR000BMZ	ELF1-human	EFO:0001187	HepG2	immortalized cell line	Homo sampiens
ENCFF833TQH	ENCBS276VDW	ENCSR778QLY	ELF4-human	EFO:0001184	HEK293T	immortalized cell line	Homo sampiens
ENCFF807RZI	ENCBS582KZL	ENCSR778QLY	ELF4-human	EFO:0001184	HEK293T	immortalized cell line	Homo sampiens
ENCFF606YTH	ENCBS101QRF	ENCSR638QHV	ELF4-human	EFO:0002067	K562	immortalized cell line	Homo sampiens
ENCFF105XTZ	ENCBS994WPS	ENCSR638QHV	ELF4-human	EFO:0002067	K562	immortalized cell line	Homo sampiens
ENCFF035OKO	ENCBS611JSC	ENCSR623KNM	ELK1-human	EFO:0001086	A549	immortalized cell line	Homo sampiens
ENCFF378MVM	ENCBS848SUF	ENCSR623KNM	ELK1-human	EFO:0001086	A549	immortalized cell line	Homo sampiens
ENCFF000YMM	ENCBS039ENC	ENCSR000EFU	ELK1-human	EFO:0002067	K562	immortalized cell line	Homo sampiens
ENCFF000YMP	ENCBS039ENC	ENCSR000EFU	ELK1-human	EFO:0002067	K562	immortalized cell line	Homo sampiens
ENCFF265GRP	ENCBS039ENC	ENCSR000EFU	ELK1-human	EFO:0002067	K562	immortalized cell line	Homo sampiens
ENCFF526XKG	ENCBS039ENC	ENCSR000EFU	ELK1-human	EFO:0002067	K562	immortalized cell line	Homo sampiens
ENCFF422DHE	ENCBS648SCY	ENCSR664OKA	ELK1-human	NTR:0004647	IMR-90	primary cell	Homo sampiens
ENCFF505MRY	ENCBS486FIC	ENCSR664OKA	ELK1-human	NTR:0004647	IMR-90	primary cell	Homo sampiens
ENCFF000VUV	ENCBS630AAA	ENCSR000DZB	ELK1-human	EFO:0002784	GM12878	immortalized cell line	Homo sampiens
ENCFF000VVD	ENCBS630AAA	ENCSR000DZB	ELK1-human	EFO:0002784	GM12878	immortalized cell line	Homo sampiens
ENCFF000XDL	ENCBS637AAA	ENCSR000ECI	ELK1-human	EFO:0002791	HeLa-S3	immortalized cell line	Homo sampiens
ENCFF000XDM	ENCBS637AAA	ENCSR000ECI	ELK1-human	EFO:0002791	HeLa-S3	immortalized cell line	Homo sampiens
ENCFF157ZBY	ENCBS216AOQ	ENCSR382WLL	ELK1-human	EFO:0001203	MCF-7	immortalized cell line	Homo sampiens
ENCFF054VLG	ENCBS616MBU	ENCSR382WLL	ELK1-human	EFO:0001203	MCF-7	immortalized cell line	Homo sampiens
ENCFF000XDY	ENCBS500SDW	ENCSR000EVI	ELK4-human	EFO:0002791	HeLa-S3	immortalized cell line	Homo sampiens
ENCFF000XEA	ENCBS500SDW	ENCSR000EVI	ELK4-human	EFO:0002791	HeLa-S3	immortalized cell line	Homo sampiens
ENCFF000WXK	ENCBS479AAA	ENCSR000EVB	ELK4-human	EFO:0001182	HEK293	immortalized cell line	Homo sampiens
ENCFF000WXN	ENCBS479AAA	ENCSR000EVB	ELK4-human	EFO:0001182	HEK293	immortalized cell line	Homo sampiens
ENCFF000RAP	ENCBS428ENC	ENCSR000BUA	EP300-human	EFO:0003072	SK-N-SH	immortalized cell line	Homo sampiens
ENCFF000RAS	ENCBS428ENC	ENCSR000BUA	EP300-human	EFO:0003072	SK-N-SH	immortalized cell line	Homo sampiens
ENCFF000OQL	ENCBS111ENC	ENCSR000BKK	EP300-human	EFO:0003042	H1-hESC	stem cell	Homo sampiens
ENCFF000OQP	ENCBS111ENC	ENCSR000BKK	EP300-human	EFO:0003042	H1-hESC	stem cell	Homo sampiens
ENCFF060WKJ	ENCBS111ENC	ENCSR000BKK	EP300-human	EFO:0003042	H1-hESC	stem cell	Homo sampiens
ENCFF123VAK	ENCBS111ENC	ENCSR000BKK	EP300-human	EFO:0003042	H1-hESC	stem cell	Homo sampiens
ENCFF000RFL	ENCBS404ENC	ENCSR000BMA	EP300-human	EFO:0003072	SK-N-SH	immortalized cell line	Homo sampiens
ENCFF000RFM	ENCBS404ENC	ENCSR000BMA	EP300-human	EFO:0003072	SK-N-SH	immortalized cell line	Homo sampiens
ENCFF334LHA	ENCBS404ENC	ENCSR000BMA	EP300-human	EFO:0003072	SK-N-SH	immortalized cell line	Homo sampiens
ENCFF191ERP	ENCBS404ENC	ENCSR000BMA	EP300-human	EFO:0003072	SK-N-SH	immortalized cell line	Homo sampiens
ENCFF000XJH	ENCBS637AAA	ENCSR000ECV	EP300-human	EFO:0002791	HeLa-S3	immortalized cell line	Homo sampiens
ENCFF000XJJ	ENCBS637AAA	ENCSR000ECV	EP300-human	EFO:0002791	HeLa-S3	immortalized cell line	Homo sampiens
ENCFF000ZRT	ENCBS376ENC	ENCSR000EHV	EP300-human	EFO:0003072	SK-N-SH	immortalized cell line	Homo sampiens
ENCFF000ZSA	ENCBS376ENC	ENCSR000EHV	EP300-human	EFO:0003072	SK-N-SH	immortalized cell line	Homo sampiens
ENCFF852YOF	ENCBS376ENC	ENCSR000EHV	EP300-human	EFO:0003072	SK-N-SH	immortalized cell line	Homo sampiens
ENCFF857TBE	ENCBS376ENC	ENCSR000EHV	EP300-human	EFO:0003072	SK-N-SH	immortalized cell line	Homo sampiens
ENCFF000PMO	ENCBS114ENC	ENCSR000BLW	EP300-human	EFO:0001187	HepG2	immortalized cell line	Homo sampiens
ENCFF000PMR	ENCBS114ENC	ENCSR000BLW	EP300-human	EFO:0001187	HepG2	immortalized cell line	Homo sampiens
ENCFF373JKP	ENCBS114ENC	ENCSR000BLW	EP300-human	EFO:0001187	HepG2	immortalized cell line	Homo sampiens
ENCFF581OIB	ENCBS114ENC	ENCSR000BLW	EP300-human	EFO:0001187	HepG2	immortalized cell line	Homo sampiens
ENCFF000CAH	ENCBS674MPN	ENCSR000AQB	EP300-human	EFO:0002067	K562	immortalized cell line	Homo sampiens
ENCFF000CAJ	ENCBS674MPN	ENCSR000AQB	EP300-human	EFO:0002067	K562	immortalized cell line	Homo sampiens
ENCFF445AHU	ENCBS674MPN	ENCSR000AQB	EP300-human	EFO:0002067	K562	immortalized cell line	Homo sampiens
ENCFF214WTD	ENCBS674MPN	ENCSR000AQB	EP300-human	EFO:0002067	K562	immortalized cell line	Homo sampiens
ENCFF000WAJ	ENCBS595CWJ	ENCSR000DZD	EP300-human	EFO:0002784	GM12878	immortalized cell line	Homo sampiens
ENCFF000WAR	ENCBS588GPN	ENCSR000DZD	EP300-human	EFO:0002784	GM12878	immortalized cell line	Homo sampiens
ENCFF000NOG	ENCBS034DOC	ENCSR000BUE	EP300-human	EFO:0005718	Ishikawa	immortalized cell line	Homo sampiens
ENCFF000NOK	ENCBS034DOC	ENCSR000BUE	EP300-human	EFO:0005718	Ishikawa	immortalized cell line	Homo sampiens
ENCFF000WAS	ENCBS630AAA	ENCSR000DZG	EP300-human	EFO:0002784	GM12878	immortalized cell line	Homo sampiens
ENCFF000WAT	ENCBS630AAA	ENCSR000DZG	EP300-human	EFO:0002784	GM12878	immortalized cell line	Homo sampiens
ENCFF000YVJ	ENCBS039ENC	ENCSR000EGE	EP300-human	EFO:0002067	K562	immortalized cell line	Homo sampiens
ENCFF000YVK	ENCBS039ENC	ENCSR000EGE	EP300-human	EFO:0002067	K562	immortalized cell line	Homo sampiens
ENCFF703ULA	ENCBS039ENC	ENCSR000EGE	EP300-human	EFO:0002067	K562	immortalized cell line	Homo sampiens
ENCFF366ROL	ENCBS039ENC	ENCSR000EGE	EP300-human	EFO:0002067	K562	immortalized cell line	Homo sampiens
ENCFF000QOZ	ENCBS056AAA	ENCSR000BTR	EP300-human	EFO:0001203	MCF-7	immortalized cell line	Homo sampiens
ENCFF000QPA	ENCBS056AAA	ENCSR000BTR	EP300-human	EFO:0001203	MCF-7	immortalized cell line	Homo sampiens
ENCFF000YVS	ENCBS039ENC	ENCSR000EGY	EP300-human	EFO:0002067	K562	immortalized cell line	Homo sampiens
ENCFF000YVT	ENCBS039ENC	ENCSR000EGY	EP300-human	EFO:0002067	K562	immortalized cell line	Homo sampiens
ENCFF424FHJ	ENCBS039ENC	ENCSR000EGY	EP300-human	EFO:0002067	K562	immortalized cell line	Homo sampiens
ENCFF330CRR	ENCBS039ENC	ENCSR000EGY	EP300-human	EFO:0002067	K562	immortalized cell line	Homo sampiens
ENCFF000NYS	ENCBS110ENC	ENCSR000BHB	EP300-human	EFO:0002784	GM12878	immortalized cell line	Homo sampiens
ENCFF000NYW	ENCBS110ENC	ENCSR000BHB	EP300-human	EFO:0002784	GM12878	immortalized cell line	Homo sampiens
ENCFF187YDX	ENCBS110ENC	ENCSR000BHB	EP300-human	EFO:0002784	GM12878	immortalized cell line	Homo sampiens
ENCFF234DXO	ENCBS110ENC	ENCSR000BHB	EP300-human	EFO:0002784	GM12878	immortalized cell line	Homo sampiens
ENCFF000RJB	ENCBS597ENC	ENCSR000BLM	EP300-human	EFO:0001247	T47D	immortalized cell line	Homo sampiens
ENCFF000RJE	ENCBS597ENC	ENCSR000BLM	EP300-human	EFO:0001247	T47D	immortalized cell line	Homo sampiens
ENCFF426MYS	ENCBS597ENC	ENCSR000BLM	EP300-human	EFO:0001247	T47D	immortalized cell line	Homo sampiens
ENCFF642JNE	ENCBS597ENC	ENCSR000BLM	EP300-human	EFO:0001247	T47D	immortalized cell line	Homo sampiens
ENCFF000XVL	ENCBS638AAA	ENCSR000EDV	EP300-human	EFO:0001187	HepG2	immortalized cell line	Homo sampiens
ENCFF000XVN	ENCBS638AAA	ENCSR000EDV	EP300-human	EFO:0001187	HepG2	immortalized cell line	Homo sampiens
ENCFF608WKP	ENCBS638AAA	ENCSR000EDV	EP300-human	EFO:0001187	HepG2	immortalized cell line	Homo sampiens
ENCFF157CZE	ENCBS638AAA	ENCSR000EDV	EP300-human	EFO:0001187	HepG2	immortalized cell line	Homo sampiens
ENCFF000NDS	ENCBS423ENC	ENCSR000BPW	EP300-human	EFO:0001086	A549	immortalized cell line	Homo sampiens
ENCFF000NDZ	ENCBS423ENC	ENCSR000BPW	EP300-human	EFO:0001086	A549	immortalized cell line	Homo sampiens
ENCFF540LLB	ENCBS423ENC	ENCSR000BPW	EP300-human	EFO:0001086	A549	immortalized cell line	Homo sampiens
ENCFF864VSA	ENCBS423ENC	ENCSR000BPW	EP300-human	EFO:0001086	A549	immortalized cell line	Homo sampiens
ENCFF000CUI	ENCBS341AAA	ENCSR000AUD	EP300-human	CL:0000062	Osteoblast	primary cell	Homo sampiens
ENCFF000CUL	ENCBS653BJC	ENCSR000AUD	EP300-human	CL:0000062	Osteoblast	primary cell	Homo sampiens
ENCFF996KKN	ENCBS653BJC	ENCSR000AUD	EP300-human	CL:0000062	Osteoblast	primary cell	Homo sampiens
ENCFF106MLW	ENCBS341AAA	ENCSR000AUD	EP300-human	CL:0000062	Osteoblast	primary cell	Homo sampiens
ENCFF000AYZ	ENCBS380OBH	ENCSR000AUQ	EP300-human	EFO:0003042	H1-hESC	stem cell	Homo sampiens
ENCFF000RHL	ENCBS597ENC	ENCSR000BLL	ESR1-human	EFO:0001247	T47D	immortalized cell line	Homo sampiens
ENCFF000RHN	ENCBS597ENC	ENCSR000BLL	ESR1-human	EFO:0001247	T47D	immortalized cell line	Homo sampiens
ENCFF002HVX	ENCBS597ENC	ENCSR000BLL	ESR1-human	EFO:0001247	T47D	immortalized cell line	Homo sampiens
ENCFF698QEQ	ENCBS597ENC	ENCSR000BLL	ESR1-human	EFO:0001247	T47D	immortalized cell line	Homo sampiens
ENCFF000NLX	ENCBS624SHM	ENCSR000BKL	ESR1-human	EFO:0005718	Ishikawa	immortalized cell line	Homo sampiens
ENCFF000NMA	ENCBS624SHM	ENCSR000BKL	ESR1-human	EFO:0005718	Ishikawa	immortalized cell line	Homo sampiens
ENCFF432OBK	ENCBS624SHM	ENCSR000BKL	ESR1-human	EFO:0005718	Ishikawa	immortalized cell line	Homo sampiens
ENCFF699BMT	ENCBS624SHM	ENCSR000BKL	ESR1-human	EFO:0005718	Ishikawa	immortalized cell line	Homo sampiens
ENCFF000RHH	ENCBS603ENC	ENCSR000BJS	ESR1-human	EFO:0001247	T47D	immortalized cell line	Homo sampiens
ENCFF000RHK	ENCBS603ENC	ENCSR000BJS	ESR1-human	EFO:0001247	T47D	immortalized cell line	Homo sampiens
ENCFF154TCG	ENCBS603ENC	ENCSR000BJS	ESR1-human	EFO:0001247	T47D	immortalized cell line	Homo sampiens
ENCFF191RAG	ENCBS603ENC	ENCSR000BJS	ESR1-human	EFO:0001247	T47D	immortalized cell line	Homo sampiens
ENCFF000RGZ	ENCBS599ENC	ENCSR000BQD	ESR1-human	EFO:0001247	T47D	immortalized cell line	Homo sampiens
ENCFF000RHC	ENCBS599ENC	ENCSR000BQD	ESR1-human	EFO:0001247	T47D	immortalized cell line	Homo sampiens
ENCFF334WOO	ENCBS599ENC	ENCSR000BQD	ESR1-human	EFO:0001247	T47D	immortalized cell line	Homo sampiens
ENCFF690QBI	ENCBS599ENC	ENCSR000BQD	ESR1-human	EFO:0001247	T47D	immortalized cell line	Homo sampiens
ENCFF000NLJ	ENCBS312UTV	ENCSR000BIZ	ESR1-human	EFO:0005718	Ishikawa	immortalized cell line	Homo sampiens
ENCFF000NLL	ENCBS312UTV	ENCSR000BIZ	ESR1-human	EFO:0005718	Ishikawa	immortalized cell line	Homo sampiens
ENCFF902HRT	ENCBS312UTV	ENCSR000BIZ	ESR1-human	EFO:0005718	Ishikawa	immortalized cell line	Homo sampiens
ENCFF277EKP	ENCBS312UTV	ENCSR000BIZ	ESR1-human	EFO:0005718	Ishikawa	immortalized cell line	Homo sampiens
ENCFF000NLP	ENCBS670ZEX	ENCSR000BIY	ESR1-human	EFO:0005718	Ishikawa	immortalized cell line	Homo sampiens
ENCFF000NLS	ENCBS670ZEX	ENCSR000BIY	ESR1-human	EFO:0005718	Ishikawa	immortalized cell line	Homo sampiens
ENCFF312WJL	ENCBS670ZEX	ENCSR000BIY	ESR1-human	EFO:0005718	Ishikawa	immortalized cell line	Homo sampiens
ENCFF122FZS	ENCBS670ZEX	ENCSR000BIY	ESR1-human	EFO:0005718	Ishikawa	immortalized cell line	Homo sampiens
ENCFF000NLB	ENCBS347ANJ	ENCSR000BQR	ESR1-human	EFO:0005718	Ishikawa	immortalized cell line	Homo sampiens
ENCFF000NLE	ENCBS347ANJ	ENCSR000BQR	ESR1-human	EFO:0005718	Ishikawa	immortalized cell line	Homo sampiens
ENCFF670BCP	ENCBS347ANJ	ENCSR000BQR	ESR1-human	EFO:0005718	Ishikawa	immortalized cell line	Homo sampiens
ENCFF260DQF	ENCBS347ANJ	ENCSR000BQR	ESR1-human	EFO:0005718	Ishikawa	immortalized cell line	Homo sampiens
ENCFF000RHR	ENCBS601ENC	ENCSR000BKN	ESR1-human	EFO:0001247	T47D	immortalized cell line	Homo sampiens
ENCFF000RHU	ENCBS601ENC	ENCSR000BKN	ESR1-human	EFO:0001247	T47D	immortalized cell line	Homo sampiens
ENCFF234TXK	ENCBS601ENC	ENCSR000BKN	ESR1-human	EFO:0001247	T47D	immortalized cell line	Homo sampiens
ENCFF655SMZ	ENCBS601ENC	ENCSR000BKN	ESR1-human	EFO:0001247	T47D	immortalized cell line	Homo sampiens
ENCFF747PCD	ENCBS351GWD	ENCSR486IFJ	ESRRA-human	EFO:0002067	K562	immortalized cell line	Homo sampiens
ENCFF558XOV	ENCBS293ZDP	ENCSR486IFJ	ESRRA-human	EFO:0002067	K562	immortalized cell line	Homo sampiens
ENCFF827OOM	ENCBS277AMO	ENCSR473SUA	ESRRA-human	EFO:0001086	A549	immortalized cell line	Homo sampiens
ENCFF466OCY	ENCBS611JSC	ENCSR473SUA	ESRRA-human	EFO:0001086	A549	immortalized cell line	Homo sampiens
ENCFF000VVE	ENCBS630AAA	ENCSR000DYQ	ESRRA-human	EFO:0002784	GM12878	immortalized cell line	Homo sampiens
ENCFF000VVL	ENCBS630AAA	ENCSR000DYQ	ESRRA-human	EFO:0002784	GM12878	immortalized cell line	Homo sampiens
ENCFF384RBC	ENCBS630AAA	ENCSR000DYQ	ESRRA-human	EFO:0002784	GM12878	immortalized cell line	Homo sampiens
ENCFF329PQZ	ENCBS630AAA	ENCSR000DYQ	ESRRA-human	EFO:0002784	GM12878	immortalized cell line	Homo sampiens
ENCFF000XRD	ENCBS848AAA	ENCSR000EEW	ESRRA-human	EFO:0001187	HepG2	immortalized cell line	Homo sampiens
ENCFF000XRE	ENCBS848AAA	ENCSR000EEW	ESRRA-human	EFO:0001187	HepG2	immortalized cell line	Homo sampiens
ENCFF265BKP	ENCBS536NWC	ENCSR954WVZ	ESRRA-human	EFO:0001203	MCF-7	immortalized cell line	Homo sampiens
ENCFF701AFL	ENCBS216AOQ	ENCSR954WVZ	ESRRA-human	EFO:0001203	MCF-7	immortalized cell line	Homo sampiens
ENCFF741SOH	ENCBS368AAA	ENCSR534VHI	ETS1-human	EFO:0004905	Induced pluripotent stem cell	induced pluripotent stem cell line	Homo sampiens
ENCFF692CCY	ENCBS373AAA	ENCSR534VHI	ETS1-human	EFO:0004905	Induced pluripotent stem cell	induced pluripotent stem cell line	Homo sampiens
ENCFF000NVG	ENCBS110ENC	ENCSR000BKA	ETS1-human	EFO:0002784	GM12878	immortalized cell line	Homo sampiens
ENCFF000NVL	ENCBS110ENC	ENCSR000BKA	ETS1-human	EFO:0002784	GM12878	immortalized cell line	Homo sampiens
ENCFF371ZBY	ENCBS110ENC	ENCSR000BKA	ETS1-human	EFO:0002784	GM12878	immortalized cell line	Homo sampiens
ENCFF477EHC	ENCBS110ENC	ENCSR000BKA	ETS1-human	EFO:0002784	GM12878	immortalized cell line	Homo sampiens
ENCFF000MYZ	ENCBS423ENC	ENCSR000BPU	ETS1-human	EFO:0001086	A549	immortalized cell line	Homo sampiens
ENCFF000MZC	ENCBS423ENC	ENCSR000BPU	ETS1-human	EFO:0001086	A549	immortalized cell line	Homo sampiens
ENCFF455WGF	ENCBS423ENC	ENCSR000BPU	ETS1-human	EFO:0001086	A549	immortalized cell line	Homo sampiens
ENCFF866ZRH	ENCBS423ENC	ENCSR000BPU	ETS1-human	EFO:0001086	A549	immortalized cell line	Homo sampiens
ENCFF000PZR	ENCBS109ENC	ENCSR000BKQ	ETS1-human	EFO:0002067	K562	immortalized cell line	Homo sampiens
ENCFF000PZU	ENCBS109ENC	ENCSR000BKQ	ETS1-human	EFO:0002067	K562	immortalized cell line	Homo sampiens
ENCFF006UXO	ENCBS109ENC	ENCSR000BKQ	ETS1-human	EFO:0002067	K562	immortalized cell line	Homo sampiens
ENCFF468AKT	ENCBS109ENC	ENCSR000BKQ	ETS1-human	EFO:0002067	K562	immortalized cell line	Homo sampiens
ENCFF262QTI	ENCBS684ULB	ENCSR714YZG	ETV4-human	EFO:0001187	HepG2	immortalized cell line	Homo sampiens
ENCFF396PIB	ENCBS250DDC	ENCSR714YZG	ETV4-human	EFO:0001187	HepG2	immortalized cell line	Homo sampiens
ENCFF890OID	ENCBS489ZOH	ENCSR124BJR	ETV6-human	EFO:0002067	K562	immortalized cell line	Homo sampiens
ENCFF460VLB	ENCBS534MHY	ENCSR124BJR	ETV6-human	EFO:0002067	K562	immortalized cell line	Homo sampiens
ENCFF636GYT	ENCBS601AAA	ENCSR000FCE	ETV6-human	EFO:0002067	K562	immortalized cell line	Homo sampiens
ENCFF970YTT	ENCBS602AAA	ENCSR000FCE	ETV6-human	EFO:0002067	K562	immortalized cell line	Homo sampiens
ENCFF209SJM	ENCBS460NBS	ENCSR626VUC	ETV6-human	EFO:0002784	GM12878	immortalized cell line	Homo sampiens
ENCFF901ETI	ENCBS083XJQ	ENCSR626VUC	ETV6-human	EFO:0002784	GM12878	immortalized cell line	Homo sampiens
ENCFF481EUA	ENCBS260WJQ	ENCSR597VGC	ETV6-human	EFO:0002784	GM12878	immortalized cell line	Homo sampiens
ENCFF102NUJ	ENCBS802GDX	ENCSR597VGC	ETV6-human	EFO:0002784	GM12878	immortalized cell line	Homo sampiens
ENCFF000ARL	ENCBS715VCP	ENCSR000ARD	EZH2-human	EFO:0002784	GM12878	immortalized cell line	Homo sampiens
ENCFF000ARN	ENCBS830CIQ	ENCSR000ARD	EZH2-human	EFO:0002784	GM12878	immortalized cell line	Homo sampiens
ENCFF000CMI	ENCBS650AAA	ENCSR000ARK	EZH2-human	CL:0000312	Keratinocyte	primary cell	Homo sampiens
ENCFF000CMK	ENCBS650AAA	ENCSR000ARK	EZH2-human	CL:0000312	Keratinocyte	primary cell	Homo sampiens
ENCFF000BKL	ENCBS914GNL	ENCSR000ARH	EZH2-human	CL:0000515	Skeletal muscle myoblast	primary cell	Homo sampiens
ENCFF000BKN	ENCBS219OWB	ENCSR000ARH	EZH2-human	CL:0000515	Skeletal muscle myoblast	primary cell	Homo sampiens
ENCFF272WPB	ENCBS914GNL	ENCSR000ARH	EZH2-human	CL:0000515	Skeletal muscle myoblast	primary cell	Homo sampiens
ENCFF543GAK	ENCBS219OWB	ENCSR000ARH	EZH2-human	CL:0000515	Skeletal muscle myoblast	primary cell	Homo sampiens
ENCFF012SMV	ENCBS967MVZ	ENCSR906IQU	EZH2-human	EFO:0001203	MCF-7	immortalized cell line	Homo sampiens
ENCFF150VPN	ENCBS789UPK	ENCSR906IQU	EZH2-human	EFO:0001203	MCF-7	immortalized cell line	Homo sampiens
ENCFF000CIX	ENCBS617RCN	ENCSR000ASE	EZH2-human	CL:0002551	Fibroblast of dermis	primary cell	Homo sampiens
ENCFF000CJA	ENCBS068KST	ENCSR000ASE	EZH2-human	CL:0002551	Fibroblast of dermis	primary cell	Homo sampiens
ENCFF530XPP	ENCBS617RCN	ENCSR000ASE	EZH2-human	CL:0002551	Fibroblast of dermis	primary cell	Homo sampiens
ENCFF893UBS	ENCBS068KST	ENCSR000ASE	EZH2-human	CL:0002551	Fibroblast of dermis	primary cell	Homo sampiens
ENCFF000BNP	ENCBS276EMT	ENCSR000ASZ	EZH2-human	CL:0002372	Myotube	in vitro differentiated cells	Homo sampiens
ENCFF000BNV	ENCBS639UHS	ENCSR000ASZ	EZH2-human	CL:0002372	Myotube	in vitro differentiated cells	Homo sampiens
ENCFF725PER	ENCBS276EMT	ENCSR000ASZ	EZH2-human	CL:0002372	Myotube	in vitro differentiated cells	Homo sampiens
ENCFF413OZJ	ENCBS639UHS	ENCSR000ASZ	EZH2-human	CL:0002372	Myotube	in vitro differentiated cells	Homo sampiens
ENCFF000AOD	ENCBS282AAA	ENCSR000ASW	EZH2-human	EFO:0007074	DND-41	immortalized cell line	Homo sampiens
ENCFF000AOE	ENCBS439IWV	ENCSR000ASW	EZH2-human	EFO:0007074	DND-41	immortalized cell line	Homo sampiens
ENCFF000AOI	ENCBS688JZQ	ENCSR000ASW	EZH2-human	EFO:0007074	DND-41	immortalized cell line	Homo sampiens
ENCFF862CIM	ENCBS688JZQ	ENCSR000ASW	EZH2-human	EFO:0007074	DND-41	immortalized cell line	Homo sampiens
ENCFF201AVF	ENCBS282AAA	ENCSR000ASW	EZH2-human	EFO:0007074	DND-41	immortalized cell line	Homo sampiens
ENCFF416AVM	ENCBS439IWV	ENCSR000ASW	EZH2-human	EFO:0007074	DND-41	immortalized cell line	Homo sampiens
ENCFF000BAP	ENCBS075PNA	ENCSR000ATC	EZH2-human	EFO:0002791	HeLa-S3	immortalized cell line	Homo sampiens
ENCFF000BAR	ENCBS655ARO	ENCSR000ATC	EZH2-human	EFO:0002791	HeLa-S3	immortalized cell line	Homo sampiens
ENCFF081LSC	ENCBS655ARO	ENCSR000ATC	EZH2-human	EFO:0002791	HeLa-S3	immortalized cell line	Homo sampiens
ENCFF162NDI	ENCBS075PNA	ENCSR000ATC	EZH2-human	EFO:0002791	HeLa-S3	immortalized cell line	Homo sampiens
ENCFF000CQR	ENCBS149EDI	ENCSR000ARO	EZH2-human	CL:0002553	Fibroblast of lung	primary cell	Homo sampiens
ENCFF000CQS	ENCBS339AAA	ENCSR000ARO	EZH2-human	CL:0002553	Fibroblast of lung	primary cell	Homo sampiens
ENCFF517CBX	ENCBS149EDI	ENCSR000ARO	EZH2-human	CL:0002553	Fibroblast of lung	primary cell	Homo sampiens
ENCFF874IUN	ENCBS339AAA	ENCSR000ARO	EZH2-human	CL:0002553	Fibroblast of lung	primary cell	Homo sampiens
ENCFF000BHG	ENCBS091ENC	ENCSR000ARE	EZH2-human	CL:0002327	Mammary epithelial cell	primary cell	Homo sampiens
ENCFF000BHK	ENCBS045GHW	ENCSR000ARE	EZH2-human	CL:0002327	Mammary epithelial cell	primary cell	Homo sampiens
ENCFF355LBA	ENCBS091ENC	ENCSR000ARE	EZH2-human	CL:0002327	Mammary epithelial cell	primary cell	Homo sampiens
ENCFF840LUZ	ENCBS045GHW	ENCSR000ARE	EZH2-human	CL:0002327	Mammary epithelial cell	primary cell	Homo sampiens
ENCFF000ANB	ENCBS400ARI	ENCSR000AUZ	EZH2-human	CL:0000236	B cell	primary cell	Homo sampiens
ENCFF000ANA	ENCBS836CYW	ENCSR000AUZ	EZH2-human	CL:0000236	B cell	primary cell	Homo sampiens
ENCFF009VFJ	ENCBS400ARI	ENCSR000AUZ	EZH2-human	CL:0000236	B cell	primary cell	Homo sampiens
ENCFF724KQS	ENCBS836CYW	ENCSR000AUZ	EZH2-human	CL:0000236	B cell	primary cell	Homo sampiens
ENCFF000BRA	ENCBS859WPH	ENCSR000ATA	EZH2-human	CL:0002618	Endothelial cell of umbilical vein	primary cell	Homo sampiens
ENCFF000BRB	ENCBS717AAA	ENCSR000ATA	EZH2-human	CL:0002618	Endothelial cell of umbilical vein	primary cell	Homo sampiens
ENCFF178TBW	ENCBS717AAA	ENCSR000ATA	EZH2-human	CL:0002618	Endothelial cell of umbilical vein	primary cell	Homo sampiens
ENCFF576TUZ	ENCBS859WPH	ENCSR000ATA	EZH2-human	CL:0002618	Endothelial cell of umbilical vein	primary cell	Homo sampiens
ENCFF000BWG	ENCBS639AAA	ENCSR000AQE	EZH2-human	EFO:0002067	K562	immortalized cell line	Homo sampiens
ENCFF000BWH	ENCBS674MPN	ENCSR000AQE	EZH2-human	EFO:0002067	K562	immortalized cell line	Homo sampiens
ENCFF257UWF	ENCBS674MPN	ENCSR000AQE	EZH2-human	EFO:0002067	K562	immortalized cell line	Homo sampiens
ENCFF083IDB	ENCBS639AAA	ENCSR000AQE	EZH2-human	EFO:0002067	K562	immortalized cell line	Homo sampiens
ENCFF000AVO	ENCBS253TYD	ENCSR000ASY	EZH2-human	EFO:0003042	H1-hESC	stem cell	Homo sampiens
ENCFF000AVQ	ENCBS380OBH	ENCSR000ASY	EZH2-human	EFO:0003042	H1-hESC	stem cell	Homo sampiens
ENCFF181PAJ	ENCBS253TYD	ENCSR000ASY	EZH2-human	EFO:0003042	H1-hESC	stem cell	Homo sampiens
ENCFF654ROL	ENCBS380OBH	ENCSR000ASY	EZH2-human	EFO:0003042	H1-hESC	stem cell	Homo sampiens
ENCFF000CFS	ENCBS096LWS	ENCSR000ARR	EZH2-human	CL:0000127	Astrocyte	primary cell	Homo sampiens
ENCFF000CFU	ENCBS020ENC	ENCSR000ARR	EZH2-human	CL:0000127	Astrocyte	primary cell	Homo sampiens
ENCFF048MQV	ENCBS096LWS	ENCSR000ARR	EZH2-human	CL:0000127	Astrocyte	primary cell	Homo sampiens
ENCFF290QBZ	ENCBS020ENC	ENCSR000ARR	EZH2-human	CL:0000127	Astrocyte	primary cell	Homo sampiens
ENCFF579XSU	ENCBS520VFV	ENCSR384LYW	EZH2-human	CL:0000182	Hepatocyte	in vitro differentiated cells	Homo sampiens
ENCFF536BYQ	ENCBS077RUJ	ENCSR384LYW	EZH2-human	CL:0000182	Hepatocyte	in vitro differentiated cells	Homo sampiens
ENCFF000BEB	ENCBS295NFS	ENCSR000ARI	EZH2-human	EFO:0001187	HepG2	immortalized cell line	Homo sampiens
ENCFF000BEE	ENCBS638AAA	ENCSR000ARI	EZH2-human	EFO:0001187	HepG2	immortalized cell line	Homo sampiens
ENCFF293TTT	ENCBS295NFS	ENCSR000ARI	EZH2-human	EFO:0001187	HepG2	immortalized cell line	Homo sampiens
ENCFF978OOP	ENCBS638AAA	ENCSR000ARI	EZH2-human	EFO:0001187	HepG2	immortalized cell line	Homo sampiens
ENCFF591YSD	ENCBS967MVZ	ENCSR460YHB	EZH2phosphoT487-human	EFO:0001203	MCF-7	immortalized cell line	Homo sampiens
ENCFF182CTU	ENCBS789UPK	ENCSR460YHB	EZH2phosphoT487-human	EFO:0001203	MCF-7	immortalized cell line	Homo sampiens
ENCFF289DJO	ENCBS898JGF	ENCSR562NOP	EZH2phosphoT487-human	EFO:0002167	DOHH2	immortalized cell line	Homo sampiens
ENCFF485TGQ	ENCBS652PBR	ENCSR562NOP	EZH2phosphoT487-human	EFO:0002167	DOHH2	immortalized cell line	Homo sampiens
ENCFF293YFD	ENCBS018TPT	ENCSR656MXA	EZH2phosphoT487-human	NTR:0000711	Neural progenitor cell	in vitro differentiated cells	Homo sampiens
ENCFF274XMR	ENCBS044KWE	ENCSR656MXA	EZH2phosphoT487-human	NTR:0000711	Neural progenitor cell	in vitro differentiated cells	Homo sampiens
ENCFF968BOJ	ENCBS500EWH	ENCSR297MUV	EZH2phosphoT487-human	EFO:0003072	SK-N-SH	immortalized cell line	Homo sampiens
ENCFF901HAO	ENCBS018DDZ	ENCSR297MUV	EZH2phosphoT487-human	EFO:0003072	SK-N-SH	immortalized cell line	Homo sampiens
ENCFF935JGC	ENCBS374AAA	ENCSR886KKK	EZH2phosphoT487-human	NTR:0000560	Bipolar spindle neuron	in vitro differentiated cells	Homo sampiens
ENCFF692UAE	ENCBS369AAA	ENCSR886KKK	EZH2phosphoT487-human	NTR:0000560	Bipolar spindle neuron	in vitro differentiated cells	Homo sampiens
ENCFF473DTA	ENCBS777QYW	ENCSR988LZG	FLAG-ARID4B-human	EFO:0001187	HepG2	immortalized cell line	Homo sampiens
ENCFF630CIO	ENCBS957XVL	ENCSR988LZG	FLAG-ARID4B-human	EFO:0001187	HepG2	immortalized cell line	Homo sampiens
ENCFF837QKV	ENCBS852VOH	ENCSR159OCC	FLAG-ATF1-human	EFO:0002067	K562	immortalized cell line	Homo sampiens
ENCFF447TYF	ENCBS947EGW	ENCSR159OCC	FLAG-ATF1-human	EFO:0002067	K562	immortalized cell line	Homo sampiens
ENCFF374DQB	ENCBS051IBT	ENCSR253OON	FLAG-ATF1-human	EFO:0001187	HepG2	immortalized cell line	Homo sampiens
ENCFF296PIX	ENCBS949YDI	ENCSR253OON	FLAG-ATF1-human	EFO:0001187	HepG2	immortalized cell line	Homo sampiens
ENCFF756TTX	ENCBS049KBY	ENCSR669LCD	FLAG-ATF4-human	EFO:0001187	HepG2	immortalized cell line	Homo sampiens
ENCFF833MPT	ENCBS743RUU	ENCSR669LCD	FLAG-ATF4-human	EFO:0001187	HepG2	immortalized cell line	Homo sampiens
ENCFF358IWC	ENCBS303QXB	ENCSR759BDG	FLAG-BCL6_isoform1-human	EFO:0001187	HepG2	immortalized cell line	Homo sampiens
ENCFF511GQK	ENCBS118UBO	ENCSR759BDG	FLAG-BCL6_isoform1-human	EFO:0001187	HepG2	immortalized cell line	Homo sampiens
ENCFF697CIN	ENCBS763IAS	ENCSR142IGM	FLAG-CEBPA-human	EFO:0001187	HepG2	immortalized cell line	Homo sampiens
ENCFF829CNY	ENCBS448PNJ	ENCSR142IGM	FLAG-CEBPA-human	EFO:0001187	HepG2	immortalized cell line	Homo sampiens
ENCFF176IME	ENCBS599NTX	ENCSR639IIZ	FLAG-CEBPG-human	EFO:0001187	HepG2	immortalized cell line	Homo sampiens
ENCFF944MOK	ENCBS264HEZ	ENCSR639IIZ	FLAG-CEBPG-human	EFO:0001187	HepG2	immortalized cell line	Homo sampiens
ENCFF447GXR	ENCBS727VRH	ENCSR331ORD	FLAG-CREB1-human	EFO:0001187	HepG2	immortalized cell line	Homo sampiens
ENCFF453OTB	ENCBS474AND	ENCSR331ORD	FLAG-CREB1-human	EFO:0001187	HepG2	immortalized cell line	Homo sampiens
ENCFF459SLH	ENCBS237GPB	ENCSR670YPQ	FLAG-DMAP1-human	EFO:0001187	HepG2	immortalized cell line	Homo sampiens
ENCFF805RHS	ENCBS385PZW	ENCSR670YPQ	FLAG-DMAP1-human	EFO:0001187	HepG2	immortalized cell line	Homo sampiens
ENCFF054MPE	ENCBS864XFG	ENCSR156CWW	FLAG-DNMT3B-human	EFO:0001187	HepG2	immortalized cell line	Homo sampiens
ENCFF968PCC	ENCBS774QLP	ENCSR156CWW	FLAG-DNMT3B-human	EFO:0001187	HepG2	immortalized cell line	Homo sampiens
ENCFF287FTU	ENCBS882UME	ENCSR765MKZ	FLAG-DRAP1-human	EFO:0001187	HepG2	immortalized cell line	Homo sampiens
ENCFF384GVG	ENCBS511OBG	ENCSR765MKZ	FLAG-DRAP1-human	EFO:0001187	HepG2	immortalized cell line	Homo sampiens
ENCFF812EKJ	ENCBS104USG	ENCSR770AOR	FLAG-ELF3-human	EFO:0001187	HepG2	immortalized cell line	Homo sampiens
ENCFF137QSY	ENCBS138IVJ	ENCSR770AOR	FLAG-ELF3-human	EFO:0001187	HepG2	immortalized cell line	Homo sampiens
ENCFF031XNE	ENCBS501TPE	ENCSR092OVN	FLAG-FOXA3-human	EFO:0001187	HepG2	immortalized cell line	Homo sampiens
ENCFF684RLL	ENCBS528TYU	ENCSR092OVN	FLAG-FOXA3-human	EFO:0001187	HepG2	immortalized cell line	Homo sampiens
ENCFF266WEU	ENCBS376BLQ	ENCSR462KYU	FLAG-GABPB1_isoform2-human	EFO:0001187	HepG2	immortalized cell line	Homo sampiens
ENCFF462CGH	ENCBS290GVX	ENCSR462KYU	FLAG-GABPB1_isoform2-human	EFO:0001187	HepG2	immortalized cell line	Homo sampiens
ENCFF077SLS	ENCBS980ARE	ENCSR269TNX	FLAG-GABP-human	EFO:0001187	HepG2	immortalized cell line	Homo sampiens
ENCFF012XJU	ENCBS549TRH	ENCSR269TNX	FLAG-GABP-human	EFO:0001187	HepG2	immortalized cell line	Homo sampiens
ENCFF670MUB	ENCBS997GPU	ENCSR108TYQ	FLAG-GATAD1-human	EFO:0001187	HepG2	immortalized cell line	Homo sampiens
ENCFF925MJO	ENCBS629EXZ	ENCSR108TYQ	FLAG-GATAD1-human	EFO:0001187	HepG2	immortalized cell line	Homo sampiens
ENCFF257FKU	ENCBS403SNA	ENCSR925BFV	FLAG-GATAD2A-human	EFO:0001187	HepG2	immortalized cell line	Homo sampiens
ENCFF025OET	ENCBS744NEQ	ENCSR925BFV	FLAG-GATAD2A-human	EFO:0001187	HepG2	immortalized cell line	Homo sampiens
ENCFF616BTZ	ENCBS305BGC	ENCSR745VSQ	FLAG-GMEB2-human	EFO:0001187	HepG2	immortalized cell line	Homo sampiens
ENCFF851OMU	ENCBS358BEO	ENCSR745VSQ	FLAG-GMEB2-human	EFO:0001187	HepG2	immortalized cell line	Homo sampiens
ENCFF998QTY	ENCBS573OLZ	ENCSR616WEG	FLAG-HBP1-human	EFO:0001187	HepG2	immortalized cell line	Homo sampiens
ENCFF431UUS	ENCBS181KHF	ENCSR616WEG	FLAG-HBP1-human	EFO:0001187	HepG2	immortalized cell line	Homo sampiens
ENCFF706KXC	ENCBS895HRB	ENCSR656JZL	FLAG-HHEX-human	EFO:0001187	HepG2	immortalized cell line	Homo sampiens
ENCFF910AZI	ENCBS882YXM	ENCSR656JZL	FLAG-HHEX-human	EFO:0001187	HepG2	immortalized cell line	Homo sampiens
ENCFF629YQB	ENCBS374RZL	ENCSR528PSI	FLAG-HLF-human	EFO:0001187	HepG2	immortalized cell line	Homo sampiens
ENCFF468OBD	ENCBS978UPK	ENCSR528PSI	FLAG-HLF-human	EFO:0001187	HepG2	immortalized cell line	Homo sampiens
ENCFF206GMY	ENCBS187GKM	ENCSR072GJV	FLAG-HMG20A-human	EFO:0001187	HepG2	immortalized cell line	Homo sampiens
ENCFF961GTC	ENCBS803OSI	ENCSR072GJV	FLAG-HMG20A-human	EFO:0001187	HepG2	immortalized cell line	Homo sampiens
ENCFF113NRO	ENCBS094XDV	ENCSR925QAW	FLAG-HMG20B_isoform2-human	EFO:0001187	HepG2	immortalized cell line	Homo sampiens
ENCFF991VFZ	ENCBS071XAT	ENCSR925QAW	FLAG-HMG20B_isoform2-human	EFO:0001187	HepG2	immortalized cell line	Homo sampiens
ENCFF942LEC	ENCBS015AWQ	ENCSR117CHD	FLAG-HOMEZ-human	EFO:0001187	HepG2	immortalized cell line	Homo sampiens
ENCFF031TWZ	ENCBS884OKX	ENCSR117CHD	FLAG-HOMEZ-human	EFO:0001187	HepG2	immortalized cell line	Homo sampiens
ENCFF417XBC	ENCBS174NQD	ENCSR954KIC	FLAG-KAT8-human	EFO:0001187	HepG2	immortalized cell line	Homo sampiens
ENCFF970GQA	ENCBS020UGF	ENCSR954KIC	FLAG-KAT8-human	EFO:0001187	HepG2	immortalized cell line	Homo sampiens
ENCFF909FDN	ENCBS916LIB	ENCSR087NSR	FLAG-KDM1A-human	EFO:0001187	HepG2	immortalized cell line	Homo sampiens
ENCFF509PAA	ENCBS198VSH	ENCSR087NSR	FLAG-KDM1A-human	EFO:0001187	HepG2	immortalized cell line	Homo sampiens
ENCFF759GZJ	ENCBS378FNW	ENCSR031ING	FLAG-KDM6A-human	EFO:0001187	HepG2	immortalized cell line	Homo sampiens
ENCFF418WTW	ENCBS299QPB	ENCSR031ING	FLAG-KDM6A-human	EFO:0001187	HepG2	immortalized cell line	Homo sampiens
ENCFF322PIR	ENCBS652ZUQ	ENCSR616OSG	FLAG-KLF11-human	EFO:0001187	HepG2	immortalized cell line	Homo sampiens
ENCFF155WNX	ENCBS028PTH	ENCSR616OSG	FLAG-KLF11-human	EFO:0001187	HepG2	immortalized cell line	Homo sampiens
ENCFF237AJA	ENCBS528WAN	ENCSR009KLQ	FLAG-KLF16-human	EFO:0001187	HepG2	immortalized cell line	Homo sampiens
ENCFF836CXT	ENCBS481HLR	ENCSR009KLQ	FLAG-KLF16-human	EFO:0001187	HepG2	immortalized cell line	Homo sampiens
ENCFF249WJP	ENCBS629SBW	ENCSR757EKM	FLAG-KLF6_isoform2-human	EFO:0001187	HepG2	immortalized cell line	Homo sampiens
ENCFF126EYL	ENCBS120UGW	ENCSR757EKM	FLAG-KLF6_isoform2-human	EFO:0001187	HepG2	immortalized cell line	Homo sampiens
ENCFF795LWN	ENCBS408KWQ	ENCSR938ETG	FLAG-KLF9-human	EFO:0001187	HepG2	immortalized cell line	Homo sampiens
ENCFF737RIN	ENCBS509ZLZ	ENCSR938ETG	FLAG-KLF9-human	EFO:0001187	HepG2	immortalized cell line	Homo sampiens
ENCFF921NVQ	ENCBS714KKA	ENCSR071YVR	FLAG-KMT2B-human	EFO:0001187	HepG2	immortalized cell line	Homo sampiens
ENCFF887RJC	ENCBS973AQL	ENCSR071YVR	FLAG-KMT2B-human	EFO:0001187	HepG2	immortalized cell line	Homo sampiens
ENCFF352OYX	ENCBS405JBR	ENCSR396QWK	FLAG-MBD1_isoform1-human	EFO:0001187	HepG2	immortalized cell line	Homo sampiens
ENCFF069NTQ	ENCBS201IDJ	ENCSR396QWK	FLAG-MBD1_isoform1-human	EFO:0001187	HepG2	immortalized cell line	Homo sampiens
ENCFF643YHU	ENCBS718VVA	ENCSR260UJI	FLAG-MBD1_isoform2-human	EFO:0001187	HepG2	immortalized cell line	Homo sampiens
ENCFF924APX	ENCBS579HCA	ENCSR260UJI	FLAG-MBD1_isoform2-human	EFO:0001187	HepG2	immortalized cell line	Homo sampiens
ENCFF176VLC	ENCBS856VUC	ENCSR115PIK	FLAG-MIER2-human	EFO:0001187	HepG2	immortalized cell line	Homo sampiens
ENCFF020TIU	ENCBS696ZBR	ENCSR115PIK	FLAG-MIER2-human	EFO:0001187	HepG2	immortalized cell line	Homo sampiens
ENCFF310MZC	ENCBS126SWO	ENCSR531VIJ	FLAG-MIER3-human	EFO:0001187	HepG2	immortalized cell line	Homo sampiens
ENCFF597IWX	ENCBS190DSQ	ENCSR531VIJ	FLAG-MIER3-human	EFO:0001187	HepG2	immortalized cell line	Homo sampiens
ENCFF279BTT	ENCBS335HAM	ENCSR966PJY	FLAG-MIXL1-human	EFO:0001187	HepG2	immortalized cell line	Homo sampiens
ENCFF497WGL	ENCBS051XDO	ENCSR966PJY	FLAG-MIXL1-human	EFO:0001187	HepG2	immortalized cell line	Homo sampiens
ENCFF739MET	ENCBS165CEX	ENCSR125DAD	FLAG-MLX-human	EFO:0001187	HepG2	immortalized cell line	Homo sampiens
ENCFF646JVE	ENCBS434CAR	ENCSR125DAD	FLAG-MLX-human	EFO:0001187	HepG2	immortalized cell line	Homo sampiens
ENCFF484TNT	ENCBS958FYV	ENCSR909GJR	FLAG-MXD3_isoform1-human	EFO:0001187	HepG2	immortalized cell line	Homo sampiens
ENCFF361EAX	ENCBS160GGD	ENCSR909GJR	FLAG-MXD3_isoform1-human	EFO:0001187	HepG2	immortalized cell line	Homo sampiens
ENCFF583KIK	ENCBS832JHL	ENCSR441KFW	FLAG-MXD4-human	EFO:0001187	HepG2	immortalized cell line	Homo sampiens
ENCFF748DXR	ENCBS423ZFU	ENCSR441KFW	FLAG-MXD4-human	EFO:0001187	HepG2	immortalized cell line	Homo sampiens
ENCFF369RCJ	ENCBS701FAD	ENCSR226QQM	FLAG-NFIA_isoform1-human	EFO:0001187	HepG2	immortalized cell line	Homo sampiens
ENCFF778TOE	ENCBS541WDY	ENCSR226QQM	FLAG-NFIA_isoform1-human	EFO:0001187	HepG2	immortalized cell line	Homo sampiens
ENCFF176ZRH	ENCBS332XCN	ENCSR201GGK	FLAG-NFIL3-human	EFO:0001187	HepG2	immortalized cell line	Homo sampiens
ENCFF380CUY	ENCBS816HNA	ENCSR201GGK	FLAG-NFIL3-human	EFO:0001187	HepG2	immortalized cell line	Homo sampiens
ENCFF961FJC	ENCBS665WXW	ENCSR569ARC	FLAG-NFYC-human	EFO:0001187	HepG2	immortalized cell line	Homo sampiens
ENCFF681XFM	ENCBS339RUH	ENCSR569ARC	FLAG-NFYC-human	EFO:0001187	HepG2	immortalized cell line	Homo sampiens
ENCFF239NUC	ENCBS653OWD	ENCSR662EOU	FLAG-NR2F1-human	EFO:0001187	HepG2	immortalized cell line	Homo sampiens
ENCFF581SJH	ENCBS873RPL	ENCSR662EOU	FLAG-NR2F1-human	EFO:0001187	HepG2	immortalized cell line	Homo sampiens
ENCFF784OML	ENCBS238TKH	ENCSR798IJO	FLAG-NR2F6-human	EFO:0001187	HepG2	immortalized cell line	Homo sampiens
ENCFF254QWH	ENCBS938JPY	ENCSR798IJO	FLAG-NR2F6-human	EFO:0001187	HepG2	immortalized cell line	Homo sampiens
ENCFF738KYR	ENCBS708MOY	ENCSR327RFM	FLAG-PAF1_isoform1-human	EFO:0001187	HepG2	immortalized cell line	Homo sampiens
ENCFF763FHB	ENCBS996RIH	ENCSR327RFM	FLAG-PAF1_isoform1-human	EFO:0001187	HepG2	immortalized cell line	Homo sampiens
ENCFF232RDZ	ENCBS456EWO	ENCSR633EIC	FLAG-PBX2-human	EFO:0002067	K562	immortalized cell line	Homo sampiens
ENCFF907MUS	ENCBS283TEI	ENCSR633EIC	FLAG-PBX2-human	EFO:0002067	K562	immortalized cell line	Homo sampiens
ENCFF393RUJ	ENCBS506FKT	ENCSR849DFF	FLAG-PBX2-human	EFO:0001187	HepG2	immortalized cell line	Homo sampiens
ENCFF085FPP	ENCBS734JXY	ENCSR849DFF	FLAG-PBX2-human	EFO:0001187	HepG2	immortalized cell line	Homo sampiens
ENCFF894SSP	ENCBS643FYF	ENCSR130VQL	FLAG-PPARG_isoform1-human	EFO:0001187	HepG2	immortalized cell line	Homo sampiens
ENCFF177JUU	ENCBS838SUU	ENCSR130VQL	FLAG-PPARG_isoform1-human	EFO:0001187	HepG2	immortalized cell line	Homo sampiens
ENCFF051OAV	ENCBS811PND	ENCSR054FKH	FLAG-RAD21-human	EFO:0001187	HepG2	immortalized cell line	Homo sampiens
ENCFF528KWW	ENCBS070YKP	ENCSR054FKH	FLAG-RAD21-human	EFO:0001187	HepG2	immortalized cell line	Homo sampiens
ENCFF614KAI	ENCBS873NNF	ENCSR703TNG	FLAG-RAD21-human	EFO:0001203	MCF-7	immortalized cell line	Homo sampiens
ENCFF717AFR	ENCBS974BZV	ENCSR703TNG	FLAG-RAD21-human	EFO:0001203	MCF-7	immortalized cell line	Homo sampiens
ENCFF539DZV	ENCBS294XYB	ENCSR500WXT	FLAG-RARA-human	EFO:0001187	HepG2	immortalized cell line	Homo sampiens
ENCFF934ZXS	ENCBS994VNP	ENCSR500WXT	FLAG-RARA-human	EFO:0001187	HepG2	immortalized cell line	Homo sampiens
ENCFF133REZ	ENCBS957VMX	ENCSR455DOO	FLAG-RCOR2-human	EFO:0001187	HepG2	immortalized cell line	Homo sampiens
ENCFF166DDT	ENCBS543FMH	ENCSR455DOO	FLAG-RCOR2-human	EFO:0001187	HepG2	immortalized cell line	Homo sampiens
ENCFF532ZHO	ENCBS362YKU	ENCSR988ZSI	FLAG-RERE-human	EFO:0001187	HepG2	immortalized cell line	Homo sampiens
ENCFF806KRN	ENCBS364WYE	ENCSR988ZSI	FLAG-RERE-human	EFO:0001187	HepG2	immortalized cell line	Homo sampiens
ENCFF101BQK	ENCBS252JAW	ENCSR633OVO	FLAG-RFX3_isoform1-human	EFO:0001187	HepG2	immortalized cell line	Homo sampiens
ENCFF378PCU	ENCBS447ONX	ENCSR633OVO	FLAG-RFX3_isoform1-human	EFO:0001187	HepG2	immortalized cell line	Homo sampiens
ENCFF538ZFY	ENCBS316AOL	ENCSR823ADL	FLAG-RFXANK-human	EFO:0001187	HepG2	immortalized cell line	Homo sampiens
ENCFF124AKH	ENCBS993XRK	ENCSR823ADL	FLAG-RFXANK-human	EFO:0001187	HepG2	immortalized cell line	Homo sampiens
ENCFF239UPK	ENCBS721GOB	ENCSR560SEP	FLAG-RXRB-human	EFO:0001187	HepG2	immortalized cell line	Homo sampiens
ENCFF953XVS	ENCBS711CCA	ENCSR560SEP	FLAG-RXRB-human	EFO:0001187	HepG2	immortalized cell line	Homo sampiens
ENCFF244QRT	ENCBS309DCO	ENCSR959OMS	FLAG-SAP130-human	EFO:0001187	HepG2	immortalized cell line	Homo sampiens
ENCFF706WAT	ENCBS579GLC	ENCSR959OMS	FLAG-SAP130-human	EFO:0001187	HepG2	immortalized cell line	Homo sampiens
ENCFF683LTQ	ENCBS650IHX	ENCSR654ORQ	FLAG-SLC30A9-human	EFO:0001187	HepG2	immortalized cell line	Homo sampiens
ENCFF195PDT	ENCBS145OEE	ENCSR654ORQ	FLAG-SLC30A9-human	EFO:0001187	HepG2	immortalized cell line	Homo sampiens
ENCFF371NEP	ENCBS903BJD	ENCSR826YMT	FLAG-SMAD4_isoform1-human	EFO:0001187	HepG2	immortalized cell line	Homo sampiens
ENCFF868KHL	ENCBS813LBD	ENCSR826YMT	FLAG-SMAD4_isoform1-human	EFO:0001187	HepG2	immortalized cell line	Homo sampiens
ENCFF740PUZ	ENCBS362ECJ	ENCSR715UCI	FLAG-SOX13_isoform1-human	EFO:0001187	HepG2	immortalized cell line	Homo sampiens
ENCFF223CHE	ENCBS937FXB	ENCSR715UCI	FLAG-SOX13_isoform1-human	EFO:0001187	HepG2	immortalized cell line	Homo sampiens
ENCFF905KCK	ENCBS809XQW	ENCSR961WLZ	FLAG-SOX5-human	EFO:0001187	HepG2	immortalized cell line	Homo sampiens
ENCFF913QFK	ENCBS837RPL	ENCSR961WLZ	FLAG-SOX5-human	EFO:0001187	HepG2	immortalized cell line	Homo sampiens
ENCFF321FUE	ENCBS851GOG	ENCSR019NPF	FLAG-SP5-human	EFO:0001187	HepG2	immortalized cell line	Homo sampiens
ENCFF451EVJ	ENCBS294MNY	ENCSR019NPF	FLAG-SP5-human	EFO:0001187	HepG2	immortalized cell line	Homo sampiens
ENCFF789MAE	ENCBS134OGP	ENCSR571PDN	FLAG-SSRP1-human	EFO:0001187	HepG2	immortalized cell line	Homo sampiens
ENCFF005ZLD	ENCBS783PVI	ENCSR571PDN	FLAG-SSRP1-human	EFO:0001187	HepG2	immortalized cell line	Homo sampiens
ENCFF727JMT	ENCBS536GGE	ENCSR497JLX	FLAG-TEAD1-human	EFO:0001187	HepG2	immortalized cell line	Homo sampiens
ENCFF414LDK	ENCBS662EIQ	ENCSR497JLX	FLAG-TEAD1-human	EFO:0001187	HepG2	immortalized cell line	Homo sampiens
ENCFF139ZPI	ENCBS806DHA	ENCSR666QNP	FLAG-TEAD3-human	EFO:0001187	HepG2	immortalized cell line	Homo sampiens
ENCFF378LSL	ENCBS648OFK	ENCSR666QNP	FLAG-TEAD3-human	EFO:0001187	HepG2	immortalized cell line	Homo sampiens
ENCFF998NVU	ENCBS586MJR	ENCSR589SNT	FLAG-TFE3-human	EFO:0001187	HepG2	immortalized cell line	Homo sampiens
ENCFF784VQV	ENCBS173ZET	ENCSR589SNT	FLAG-TFE3-human	EFO:0001187	HepG2	immortalized cell line	Homo sampiens
ENCFF288KSL	ENCBS246HTK	ENCSR993LMB	FLAG-TGIF2-human	EFO:0001187	HepG2	immortalized cell line	Homo sampiens
ENCFF057OSU	ENCBS595FPT	ENCSR993LMB	FLAG-TGIF2-human	EFO:0001187	HepG2	immortalized cell line	Homo sampiens
ENCFF774TIB	ENCBS574TUM	ENCSR562POI	FLAG-THAP11-human	EFO:0001187	HepG2	immortalized cell line	Homo sampiens
ENCFF463MDN	ENCBS223TWX	ENCSR562POI	FLAG-THAP11-human	EFO:0001187	HepG2	immortalized cell line	Homo sampiens
ENCFF397BSD	ENCBS758SOE	ENCSR430JGJ	FLAG-THRB-human	EFO:0001187	HepG2	immortalized cell line	Homo sampiens
ENCFF738WIY	ENCBS179RGX	ENCSR430JGJ	FLAG-THRB-human	EFO:0001187	HepG2	immortalized cell line	Homo sampiens
ENCFF697DRW	ENCBS818KEJ	ENCSR184SVO	FLAG-ZBTB26-human	EFO:0001187	HepG2	immortalized cell line	Homo sampiens
ENCFF454AYY	ENCBS492KIP	ENCSR184SVO	FLAG-ZBTB26-human	EFO:0001187	HepG2	immortalized cell line	Homo sampiens
ENCFF215KQN	ENCBS062DDB	ENCSR586DEH	FLAG-ZFP1_isoform1-human	EFO:0001187	HepG2	immortalized cell line	Homo sampiens
ENCFF784EHE	ENCBS419VLW	ENCSR586DEH	FLAG-ZFP1_isoform1-human	EFO:0001187	HepG2	immortalized cell line	Homo sampiens
ENCFF257TDA	ENCBS225EED	ENCSR487CPI	FLAG-ZFP64-human	EFO:0001187	HepG2	immortalized cell line	Homo sampiens
ENCFF749AGZ	ENCBS379GSU	ENCSR487CPI	FLAG-ZFP64-human	EFO:0001187	HepG2	immortalized cell line	Homo sampiens
ENCFF855QOS	ENCBS100SII	ENCSR704IGU	FLAG-ZGPAT-human	EFO:0001187	HepG2	immortalized cell line	Homo sampiens
ENCFF988EJM	ENCBS717WSM	ENCSR704IGU	FLAG-ZGPAT-human	EFO:0001187	HepG2	immortalized cell line	Homo sampiens
ENCFF135ZFA	ENCBS361LLB	ENCSR808FFI	FLAG-ZKSCAN8-human	EFO:0001187	HepG2	immortalized cell line	Homo sampiens
ENCFF466RAE	ENCBS879PSL	ENCSR808FFI	FLAG-ZKSCAN8-human	EFO:0001187	HepG2	immortalized cell line	Homo sampiens
ENCFF965CQC	ENCBS506HTI	ENCSR415AEB	FLAG-ZNF48-human	EFO:0001187	HepG2	immortalized cell line	Homo sampiens
ENCFF553BFP	ENCBS770NBJ	ENCSR415AEB	FLAG-ZNF48-human	EFO:0001187	HepG2	immortalized cell line	Homo sampiens
ENCFF571MOX	ENCBS787OIC	ENCSR372JXR	FLAG-ZNF511-human	EFO:0001187	HepG2	immortalized cell line	Homo sampiens
ENCFF362WTD	ENCBS461NPS	ENCSR372JXR	FLAG-ZNF511-human	EFO:0001187	HepG2	immortalized cell line	Homo sampiens
ENCFF967IZV	ENCBS912QJN	ENCSR173CTF	FLAG-ZNF580-human	EFO:0001187	HepG2	immortalized cell line	Homo sampiens
ENCFF787PIX	ENCBS791AMU	ENCSR173CTF	FLAG-ZNF580-human	EFO:0001187	HepG2	immortalized cell line	Homo sampiens
ENCFF019FLT	ENCBS585KCW	ENCSR578CXC	FLAG-ZNF644-human	EFO:0001187	HepG2	immortalized cell line	Homo sampiens
ENCFF104USR	ENCBS684NYN	ENCSR578CXC	FLAG-ZNF644-human	EFO:0001187	HepG2	immortalized cell line	Homo sampiens
ENCFF229FNO	ENCBS146STP	ENCSR502GAX	FLAG-ZNF652-human	EFO:0001187	HepG2	immortalized cell line	Homo sampiens
ENCFF054DOO	ENCBS307XHH	ENCSR502GAX	FLAG-ZNF652-human	EFO:0001187	HepG2	immortalized cell line	Homo sampiens
ENCFF754VKI	ENCBS429APO	ENCSR553QMC	FLAG-ZNF7_isoform2-human	EFO:0001187	HepG2	immortalized cell line	Homo sampiens
ENCFF970BNS	ENCBS971ZFZ	ENCSR553QMC	FLAG-ZNF7_isoform2-human	EFO:0001187	HepG2	immortalized cell line	Homo sampiens
ENCFF002JBN	ENCBS783OAK	ENCSR396SOH	FLAG-ZNF792-human	EFO:0001187	HepG2	immortalized cell line	Homo sampiens
ENCFF812AFI	ENCBS329MVA	ENCSR396SOH	FLAG-ZNF792-human	EFO:0001187	HepG2	immortalized cell line	Homo sampiens
ENCFF584VTC	ENCBS685SMS	ENCSR712FAM	FLAG-ZSCAN9-human	EFO:0001187	HepG2	immortalized cell line	Homo sampiens
ENCFF079UPJ	ENCBS970XZM	ENCSR712FAM	FLAG-ZSCAN9-human	EFO:0001187	HepG2	immortalized cell line	Homo sampiens
ENCFF000YIG	ENCBS039ENC	ENCSR000FAI	FOS-human	EFO:0002067	K562	immortalized cell line	Homo sampiens
ENCFF000YIH	ENCBS039ENC	ENCSR000FAI	FOS-human	EFO:0002067	K562	immortalized cell line	Homo sampiens
ENCFF000YII	ENCBS039ENC	ENCSR000FAI	FOS-human	EFO:0002067	K562	immortalized cell line	Homo sampiens
ENCFF000XBR	ENCBS637AAA	ENCSR000EZE	FOS-human	EFO:0002791	HeLa-S3	immortalized cell line	Homo sampiens
ENCFF000XBS	ENCBS637AAA	ENCSR000EZE	FOS-human	EFO:0002791	HeLa-S3	immortalized cell line	Homo sampiens
ENCFF000ZGP	ENCBS067ENC	ENCSR000DON	FOS-human	EFO:0001200	MCF 10A	immortalized cell line	Homo sampiens
ENCFF000ZGW	ENCBS067ENC	ENCSR000DON	FOS-human	EFO:0001200	MCF 10A	immortalized cell line	Homo sampiens
ENCFF474MOK	ENCBS067ENC	ENCSR000DON	FOS-human	EFO:0001200	MCF 10A	immortalized cell line	Homo sampiens
ENCFF602BPO	ENCBS067ENC	ENCSR000DON	FOS-human	EFO:0001200	MCF 10A	immortalized cell line	Homo sampiens
ENCFF111WZN	ENCBS470SXX	ENCSR124AIG	FOS-human	NTR:0004647	IMR-90	primary cell	Homo sampiens
ENCFF677SXP	ENCBS648SCY	ENCSR124AIG	FOS-human	NTR:0004647	IMR-90	primary cell	Homo sampiens
ENCFF000ZFT	ENCBS618ENC	ENCSR000DOT	FOS-human	EFO:0001200	MCF 10A	immortalized cell line	Homo sampiens
ENCFF000ZFV	ENCBS618ENC	ENCSR000DOT	FOS-human	EFO:0001200	MCF 10A	immortalized cell line	Homo sampiens
ENCFF289FZF	ENCBS618ENC	ENCSR000DOT	FOS-human	EFO:0001200	MCF 10A	immortalized cell line	Homo sampiens
ENCFF079OBK	ENCBS618ENC	ENCSR000DOT	FOS-human	EFO:0001200	MCF 10A	immortalized cell line	Homo sampiens
ENCFF000ZGF	ENCBS620ENC	ENCSR000DOP	FOS-human	EFO:0001200	MCF 10A	immortalized cell line	Homo sampiens
ENCFF000ZGG	ENCBS620ENC	ENCSR000DOP	FOS-human	EFO:0001200	MCF 10A	immortalized cell line	Homo sampiens
ENCFF532FFM	ENCBS620ENC	ENCSR000DOP	FOS-human	EFO:0001200	MCF 10A	immortalized cell line	Homo sampiens
ENCFF028RMR	ENCBS620ENC	ENCSR000DOP	FOS-human	EFO:0001200	MCF 10A	immortalized cell line	Homo sampiens
ENCFF000ZGN	ENCBS622ENC	ENCSR000DOO	FOS-human	EFO:0001200	MCF 10A	immortalized cell line	Homo sampiens
ENCFF000ZGO	ENCBS622ENC	ENCSR000DOO	FOS-human	EFO:0001200	MCF 10A	immortalized cell line	Homo sampiens
ENCFF746AYK	ENCBS622ENC	ENCSR000DOO	FOS-human	EFO:0001200	MCF 10A	immortalized cell line	Homo sampiens
ENCFF188PWS	ENCBS622ENC	ENCSR000DOO	FOS-human	EFO:0001200	MCF 10A	immortalized cell line	Homo sampiens
ENCFF000XZR	ENCBS666AAA	ENCSR000EVU	FOS-human	CL:0002618	Endothelial cell of umbilical vein	primary cell	Homo sampiens
ENCFF000XZS	ENCBS666AAA	ENCSR000EVU	FOS-human	CL:0002618	Endothelial cell of umbilical vein	primary cell	Homo sampiens
ENCFF601TQG	ENCBS666AAA	ENCSR000EVU	FOS-human	CL:0002618	Endothelial cell of umbilical vein	primary cell	Homo sampiens
ENCFF742DJF	ENCBS666AAA	ENCSR000EVU	FOS-human	CL:0002618	Endothelial cell of umbilical vein	primary cell	Homo sampiens
ENCFF000VSZ	ENCBS630AAA	ENCSR000EYZ	FOS-human	EFO:0002784	GM12878	immortalized cell line	Homo sampiens
ENCFF000VTA	ENCBS630AAA	ENCSR000EYZ	FOS-human	EFO:0002784	GM12878	immortalized cell line	Homo sampiens
ENCFF000VTB	ENCBS630AAA	ENCSR000EYZ	FOS-human	EFO:0002784	GM12878	immortalized cell line	Homo sampiens
ENCFF689SLU	ENCBS168ISE	ENCSR569XNP	FOS-human	EFO:0001203	MCF-7	immortalized cell line	Homo sampiens
ENCFF368MQN	ENCBS053YJT	ENCSR569XNP	FOS-human	EFO:0001203	MCF-7	immortalized cell line	Homo sampiens
ENCFF000OOI	ENCBS111ENC	ENCSR000BNS	FOSL1-human	EFO:0003042	H1-hESC	stem cell	Homo sampiens
ENCFF000OOM	ENCBS111ENC	ENCSR000BNS	FOSL1-human	EFO:0003042	H1-hESC	stem cell	Homo sampiens
ENCFF362KQB	ENCBS111ENC	ENCSR000BNS	FOSL1-human	EFO:0003042	H1-hESC	stem cell	Homo sampiens
ENCFF325QSH	ENCBS111ENC	ENCSR000BNS	FOSL1-human	EFO:0003042	H1-hESC	stem cell	Homo sampiens
ENCFF000PZZ	ENCBS109ENC	ENCSR000BMV	FOSL1-human	EFO:0002067	K562	immortalized cell line	Homo sampiens
ENCFF000QAC	ENCBS109ENC	ENCSR000BMV	FOSL1-human	EFO:0002067	K562	immortalized cell line	Homo sampiens
ENCFF846HET	ENCBS109ENC	ENCSR000BMV	FOSL1-human	EFO:0002067	K562	immortalized cell line	Homo sampiens
ENCFF670JGI	ENCBS109ENC	ENCSR000BMV	FOSL1-human	EFO:0002067	K562	immortalized cell line	Homo sampiens
ENCFF000OZM	ENCBS389ENC	ENCSR000BTE	FOSL1-human	EFO:0002824	HCT116	immortalized cell line	Homo sampiens
ENCFF000OZP	ENCBS389ENC	ENCSR000BTE	FOSL1-human	EFO:0002824	HCT116	immortalized cell line	Homo sampiens
ENCFF000PHI	ENCBS114ENC	ENCSR000BHP	FOSL2-human	EFO:0001187	HepG2	immortalized cell line	Homo sampiens
ENCFF000PHL	ENCBS114ENC	ENCSR000BHP	FOSL2-human	EFO:0001187	HepG2	immortalized cell line	Homo sampiens
ENCFF763XIK	ENCBS114ENC	ENCSR000BHP	FOSL2-human	EFO:0001187	HepG2	immortalized cell line	Homo sampiens
ENCFF015KCD	ENCBS114ENC	ENCSR000BHP	FOSL2-human	EFO:0001187	HepG2	immortalized cell line	Homo sampiens
ENCFF000MZK	ENCBS423ENC	ENCSR000BQO	FOSL2-human	EFO:0001086	A549	immortalized cell line	Homo sampiens
ENCFF000MZL	ENCBS423ENC	ENCSR000BQO	FOSL2-human	EFO:0001086	A549	immortalized cell line	Homo sampiens
ENCFF159NGH	ENCBS423ENC	ENCSR000BQO	FOSL2-human	EFO:0001086	A549	immortalized cell line	Homo sampiens
ENCFF983PHR	ENCBS423ENC	ENCSR000BQO	FOSL2-human	EFO:0001086	A549	immortalized cell line	Homo sampiens
ENCFF000QXM	ENCBS428ENC	ENCSR000BVB	FOSL2-human	EFO:0003072	SK-N-SH	immortalized cell line	Homo sampiens
ENCFF000QXQ	ENCBS428ENC	ENCSR000BVB	FOSL2-human	EFO:0003072	SK-N-SH	immortalized cell line	Homo sampiens
ENCFF000QME	ENCBS056AAA	ENCSR000BUI	FOSL2-human	EFO:0001203	MCF-7	immortalized cell line	Homo sampiens
ENCFF000QMI	ENCBS056AAA	ENCSR000BUI	FOSL2-human	EFO:0001203	MCF-7	immortalized cell line	Homo sampiens
ENCFF000NMF	ENCBS312UTV	ENCSR000BKW	FOXA1-human	EFO:0005718	Ishikawa	immortalized cell line	Homo sampiens
ENCFF000NMI	ENCBS312UTV	ENCSR000BKW	FOXA1-human	EFO:0005718	Ishikawa	immortalized cell line	Homo sampiens
ENCFF550UGF	ENCBS312UTV	ENCSR000BKW	FOXA1-human	EFO:0005718	Ishikawa	immortalized cell line	Homo sampiens
ENCFF944EES	ENCBS312UTV	ENCSR000BKW	FOXA1-human	EFO:0005718	Ishikawa	immortalized cell line	Homo sampiens
ENCFF000MZY	ENCBS423ENC	ENCSR000BRD	FOXA1-human	EFO:0001086	A549	immortalized cell line	Homo sampiens
ENCFF000MZZ	ENCBS423ENC	ENCSR000BRD	FOXA1-human	EFO:0001086	A549	immortalized cell line	Homo sampiens
ENCFF879AJU	ENCBS423ENC	ENCSR000BRD	FOXA1-human	EFO:0001086	A549	immortalized cell line	Homo sampiens
ENCFF336HSE	ENCBS423ENC	ENCSR000BRD	FOXA1-human	EFO:0001086	A549	immortalized cell line	Homo sampiens
ENCFF000RID	ENCBS597ENC	ENCSR000BKY	FOXA1-human	EFO:0001247	T47D	immortalized cell line	Homo sampiens
ENCFF000RIG	ENCBS597ENC	ENCSR000BKY	FOXA1-human	EFO:0001247	T47D	immortalized cell line	Homo sampiens
ENCFF185XXN	ENCBS597ENC	ENCSR000BKY	FOXA1-human	EFO:0001247	T47D	immortalized cell line	Homo sampiens
ENCFF220EVN	ENCBS597ENC	ENCSR000BKY	FOXA1-human	EFO:0001247	T47D	immortalized cell line	Homo sampiens
ENCFF787PBQ	ENCBS670IYV	ENCSR126YEB	FOXA1-human	EFO:0001203	MCF-7	immortalized cell line	Homo sampiens
ENCFF287PVI	ENCBS959SHH	ENCSR126YEB	FOXA1-human	EFO:0001203	MCF-7	immortalized cell line	Homo sampiens
ENCFF000MZP	ENCBS165AAA	ENCSR000BPX	FOXA1-human	EFO:0001086	A549	immortalized cell line	Homo sampiens
ENCFF000MZQ	ENCBS165AAA	ENCSR000BPX	FOXA1-human	EFO:0001086	A549	immortalized cell line	Homo sampiens
ENCFF844ECI	ENCBS165AAA	ENCSR000BPX	FOXA1-human	EFO:0001086	A549	immortalized cell line	Homo sampiens
ENCFF288LFN	ENCBS165AAA	ENCSR000BPX	FOXA1-human	EFO:0001086	A549	immortalized cell line	Homo sampiens
ENCFF293WLB	ENCBS401URL	ENCSR324RCI	FOXA1-human	UBERON:0002107	Liver	tissue	Homo sampiens
ENCFF811PZE	ENCBS401URL	ENCSR324RCI	FOXA1-human	UBERON:0002107	Liver	tissue	Homo sampiens
ENCFF290PNU	ENCBS803ZJJ	ENCSR267DFA	FOXA1-human	EFO:0001187	HepG2	immortalized cell line	Homo sampiens
ENCFF540FMP	ENCBS767MPH	ENCSR267DFA	FOXA1-human	EFO:0001187	HepG2	immortalized cell line	Homo sampiens
ENCFF000PHX	ENCBS114ENC	ENCSR000BLE	FOXA1-human	EFO:0001187	HepG2	immortalized cell line	Homo sampiens
ENCFF000PIC	ENCBS114ENC	ENCSR000BLE	FOXA1-human	EFO:0001187	HepG2	immortalized cell line	Homo sampiens
ENCFF994UGO	ENCBS114ENC	ENCSR000BLE	FOXA1-human	EFO:0001187	HepG2	immortalized cell line	Homo sampiens
ENCFF074KQO	ENCBS114ENC	ENCSR000BLE	FOXA1-human	EFO:0001187	HepG2	immortalized cell line	Homo sampiens
ENCFF895FUF	ENCBS046RNA	ENCSR735KEY	FOXA1-human	UBERON:0002107	Liver	tissue	Homo sampiens
ENCFF430SMC	ENCBS046RNA	ENCSR735KEY	FOXA1-human	UBERON:0002107	Liver	tissue	Homo sampiens
ENCFF339ZHE	ENCBS276VDW	ENCSR094WHO	FOXA1-human	EFO:0001184	HEK293T	immortalized cell line	Homo sampiens
ENCFF068ELI	ENCBS323RYE	ENCSR094WHO	FOXA1-human	EFO:0001184	HEK293T	immortalized cell line	Homo sampiens
ENCFF000PHQ	ENCBS114ENC	ENCSR000BMO	FOXA1-human	EFO:0001187	HepG2	immortalized cell line	Homo sampiens
ENCFF000PHT	ENCBS114ENC	ENCSR000BMO	FOXA1-human	EFO:0001187	HepG2	immortalized cell line	Homo sampiens
ENCFF793JQM	ENCBS114ENC	ENCSR000BMO	FOXA1-human	EFO:0001187	HepG2	immortalized cell line	Homo sampiens
ENCFF587IJL	ENCBS114ENC	ENCSR000BMO	FOXA1-human	EFO:0001187	HepG2	immortalized cell line	Homo sampiens
ENCFF459WEJ	ENCBS187ZIN	ENCSR819LHG	FOXA1-human	EFO:0002067	K562	immortalized cell line	Homo sampiens
ENCFF926PMG	ENCBS727RLP	ENCSR819LHG	FOXA1-human	EFO:0002067	K562	immortalized cell line	Homo sampiens
ENCFF000PIG	ENCBS114ENC	ENCSR000BNI	FOXA2-human	EFO:0001187	HepG2	immortalized cell line	Homo sampiens
ENCFF000PIK	ENCBS114ENC	ENCSR000BNI	FOXA2-human	EFO:0001187	HepG2	immortalized cell line	Homo sampiens
ENCFF771TCH	ENCBS114ENC	ENCSR000BNI	FOXA2-human	EFO:0001187	HepG2	immortalized cell line	Homo sampiens
ENCFF194PQZ	ENCBS114ENC	ENCSR000BNI	FOXA2-human	EFO:0001187	HepG2	immortalized cell line	Homo sampiens
ENCFF000NAD	ENCBS423ENC	ENCSR000BRE	FOXA2-human	EFO:0001086	A549	immortalized cell line	Homo sampiens
ENCFF000NAE	ENCBS423ENC	ENCSR000BRE	FOXA2-human	EFO:0001086	A549	immortalized cell line	Homo sampiens
ENCFF191CAG	ENCBS423ENC	ENCSR000BRE	FOXA2-human	EFO:0001086	A549	immortalized cell line	Homo sampiens
ENCFF229DWG	ENCBS423ENC	ENCSR000BRE	FOXA2-human	EFO:0001086	A549	immortalized cell line	Homo sampiens
ENCFF324BHS	ENCBS716YFX	ENCSR066EBK	FOXA2-human	EFO:0001187	HepG2	immortalized cell line	Homo sampiens
ENCFF867YPG	ENCBS731WFK	ENCSR066EBK	FOXA2-human	EFO:0001187	HepG2	immortalized cell line	Homo sampiens
ENCFF599UMI	ENCBS697XFI	ENCSR508DQA	FOXK2-human	EFO:0002067	K562	immortalized cell line	Homo sampiens
ENCFF928REO	ENCBS850QNJ	ENCSR508DQA	FOXK2-human	EFO:0002067	K562	immortalized cell line	Homo sampiens
ENCFF073XZO	ENCBS850QNJ	ENCSR302AWT	FOXK2-human	EFO:0002067	K562	immortalized cell line	Homo sampiens
ENCFF135OYM	ENCBS697XFI	ENCSR302AWT	FOXK2-human	EFO:0002067	K562	immortalized cell line	Homo sampiens
ENCFF486NOF	ENCBS339VHO	ENCSR861JUQ	FOXK2-human	EFO:0002784	GM12878	immortalized cell line	Homo sampiens
ENCFF794TKO	ENCBS276RPG	ENCSR861JUQ	FOXK2-human	EFO:0002784	GM12878	immortalized cell line	Homo sampiens
ENCFF714SYF	ENCBS323RYE	ENCSR872BOU	FOXK2-human	EFO:0001184	HEK293T	immortalized cell line	Homo sampiens
ENCFF494NAS	ENCBS276VDW	ENCSR872BOU	FOXK2-human	EFO:0001184	HEK293T	immortalized cell line	Homo sampiens
ENCFF808IEJ	ENCBS541YFT	ENCSR171FUX	FOXK2-human	EFO:0001187	HepG2	immortalized cell line	Homo sampiens
ENCFF523AHK	ENCBS591PPP	ENCSR171FUX	FOXK2-human	EFO:0001187	HepG2	immortalized cell line	Homo sampiens
ENCFF574FWU	ENCBS957OEW	ENCSR465VLK	FOXK2-human	EFO:0001203	MCF-7	immortalized cell line	Homo sampiens
ENCFF957ELP	ENCBS308QKF	ENCSR465VLK	FOXK2-human	EFO:0001203	MCF-7	immortalized cell line	Homo sampiens
ENCFF000QXV	ENCBS428ENC	ENCSR000BTB	FOXM1-human	EFO:0003072	SK-N-SH	immortalized cell line	Homo sampiens
ENCFF000QXY	ENCBS428ENC	ENCSR000BTB	FOXM1-human	EFO:0003072	SK-N-SH	immortalized cell line	Homo sampiens
ENCFF866PHS	ENCBS118YJZ	ENCSR429QPP	FOXM1-human	EFO:0002067	K562	immortalized cell line	Homo sampiens
ENCFF350LLA	ENCBS048GNZ	ENCSR429QPP	FOXM1-human	EFO:0002067	K562	immortalized cell line	Homo sampiens
ENCFF000NMN	ENCBS034DOC	ENCSR000BUS	FOXM1-human	EFO:0005718	Ishikawa	immortalized cell line	Homo sampiens
ENCFF000NMO	ENCBS034DOC	ENCSR000BUS	FOXM1-human	EFO:0005718	Ishikawa	immortalized cell line	Homo sampiens
ENCFF000QMN	ENCBS056AAA	ENCSR000BUJ	FOXM1-human	EFO:0001203	MCF-7	immortalized cell line	Homo sampiens
ENCFF000QMQ	ENCBS056AAA	ENCSR000BUJ	FOXM1-human	EFO:0001203	MCF-7	immortalized cell line	Homo sampiens
ENCFF000NVR	ENCBS110ENC	ENCSR000BRU	FOXM1-human	EFO:0002784	GM12878	immortalized cell line	Homo sampiens
ENCFF000NVU	ENCBS110ENC	ENCSR000BRU	FOXM1-human	EFO:0002784	GM12878	immortalized cell line	Homo sampiens
ENCFF287NFR	ENCBS110ENC	ENCSR000BRU	FOXM1-human	EFO:0002784	GM12878	immortalized cell line	Homo sampiens
ENCFF766UTH	ENCBS110ENC	ENCSR000BRU	FOXM1-human	EFO:0002784	GM12878	immortalized cell line	Homo sampiens
ENCFF694UQR	ENCBS716YFX	ENCSR029LBT	FOXP1-human	EFO:0001187	HepG2	immortalized cell line	Homo sampiens
ENCFF856DSG	ENCBS541YFT	ENCSR029LBT	FOXP1-human	EFO:0001187	HepG2	immortalized cell line	Homo sampiens
ENCFF000QWI	ENCBS426ENC	ENCSR000BGB	FOXP2-human	EFO:0002860	SK-N-MC	immortalized cell line	Homo sampiens
ENCFF000QWK	ENCBS426ENC	ENCSR000BGB	FOXP2-human	EFO:0002860	SK-N-MC	immortalized cell line	Homo sampiens
ENCFF257YRW	ENCBS426ENC	ENCSR000BGB	FOXP2-human	EFO:0002860	SK-N-MC	immortalized cell line	Homo sampiens
ENCFF161AYB	ENCBS426ENC	ENCSR000BGB	FOXP2-human	EFO:0002860	SK-N-MC	immortalized cell line	Homo sampiens
ENCFF000QTZ	ENCBS054ENC	ENCSR000BGA	FOXP2-human	EFO:0005234	PFSK-1	immortalized cell line	Homo sampiens
ENCFF000QUA	ENCBS054ENC	ENCSR000BGA	FOXP2-human	EFO:0005234	PFSK-1	immortalized cell line	Homo sampiens
ENCFF320MKV	ENCBS054ENC	ENCSR000BGA	FOXP2-human	EFO:0005234	PFSK-1	immortalized cell line	Homo sampiens
ENCFF054FYX	ENCBS054ENC	ENCSR000BGA	FOXP2-human	EFO:0005234	PFSK-1	immortalized cell line	Homo sampiens
ENCFF000NAM	ENCBS423ENC	ENCSR000BPY	GABPA-human	EFO:0001086	A549	immortalized cell line	Homo sampiens
ENCFF000NAN	ENCBS423ENC	ENCSR000BPY	GABPA-human	EFO:0001086	A549	immortalized cell line	Homo sampiens
ENCFF883ZYB	ENCBS423ENC	ENCSR000BPY	GABPA-human	EFO:0001086	A549	immortalized cell line	Homo sampiens
ENCFF092HRP	ENCBS423ENC	ENCSR000BPY	GABPA-human	EFO:0001086	A549	immortalized cell line	Homo sampiens
ENCFF000PIO	ENCBS114ENC	ENCSR000BJK	GABPA-human	EFO:0001187	HepG2	immortalized cell line	Homo sampiens
ENCFF000PIR	ENCBS114ENC	ENCSR000BJK	GABPA-human	EFO:0001187	HepG2	immortalized cell line	Homo sampiens
ENCFF500QLL	ENCBS114ENC	ENCSR000BJK	GABPA-human	EFO:0001187	HepG2	immortalized cell line	Homo sampiens
ENCFF802GPW	ENCBS114ENC	ENCSR000BJK	GABPA-human	EFO:0001187	HepG2	immortalized cell line	Homo sampiens
ENCFF249FIH	ENCBS110ENC	ENCSR331HPA	GABPA-human	EFO:0002784	GM12878	immortalized cell line	Homo sampiens
[truncated: 2,387 more rows]

## Sheet: Table S4_Params of EnContact
Table S4: Parameters of the deep neural network in EnContact.
Inputs	Sequence 1	Sequence 2
CNNs	ConvLayer (1024, 4 × 40)	ConvLayer (1024, 4 × 40)
	MaxPooling (1 × 20)	MaxPooling (1 × 20)
	Merge
Attention-based RNN	BatchNormalization + Dropout (0.5)
	BLSTM (100)
	Attention Layer
	BatchNormalization + Dropout (0.5)
	Dense (925)
	BatchNormalization + Dropout (0.5)
Prediction	Dense (1)
Note: ConvLayer means one convolutional layer with parameters formatted as (num_filters, filter_size).
MaxPooling means one maxpooling layer with parameters formatted as (pooling_size).
R represents the number of replicates for a given cell line.

## Sheet: Table S5_another splitting way
Table S5: Model performance (AUROC) of EnContact across seven cell lines.
We trained and evaluated our model using the new training and testing set, where we considered interactions derived from chromosome 1-18 as training set, and interactions derived from other chromosomes as testing set.
	Random contacts	Random enhancers	Random pairs
GM	0.802	0.823	0.845
K562	0.832	0.839	0.861
HCASMC	0.816	0.804	0.828
MyLa	0.796	0.813	0.834
Naive	0.851	0.865	0.831
Th17	0.846	0.853	0.866
Treg	0.829	0.838	0.842
Mean	0.824571	0.833571	0.843857
